# Supplementary material for: Synthesis of novel heterocyclic oleanolic acid derivatives with improved antiproliferative activity in solid tumor cells
Source: Royal Society of Chemistry journal article supplement (doi:10.1039/c3ob00011g), 2013-01-01

## Supporting information

### **Synthesis of novel heterocyclic oleanolic acid derivatives with improved antiproliferative activity in solid tumor cells**

Ana S. Leal, Jorge A.R. Salvador and Yongkui Jing

#### **Table of contents**

|                                                |     |
|------------------------------------------------|-----|
| 1. Spectral data for compound <b>15</b> .....  | S2  |
| 2. Spectral data for compound <b>16</b> .....  | S6  |
| 3. Spectral data for compound <b>17</b> .....  | S12 |
| 4. Spectral data for compound <b>18</b> .....  | S18 |
| 5. Spectral data for compound <b>19</b> .....  | S24 |
| 6. Spectral data for compound <b>20</b> .....  | S28 |
| 7. Spectral data for compound <b>21</b> .....  | S34 |
| 8. Spectral data for compound <b>22</b> .....  | S40 |
| 9. Spectral data for compound <b>23</b> .....  | S44 |
| 10. Spectral data for compound <b>24</b> ..... | S48 |
| 11. Spectral data for compound <b>25</b> ..... | S52 |
| 11. Spectral data for compound <b>26</b> ..... | S56 |
| 13. Spectral data for compound <b>27</b> ..... | S62 |
| 14. Spectral data for compound <b>28</b> ..... | S68 |

## 1. Spectral data for compound **15**

$^1\text{H}$  NMR spectrum for compound **15** recorded in  $\text{CDCl}_3$ .

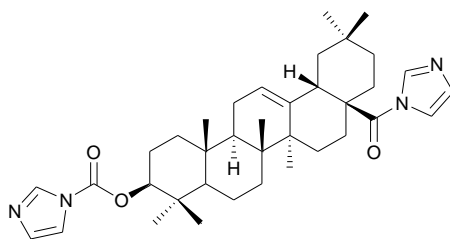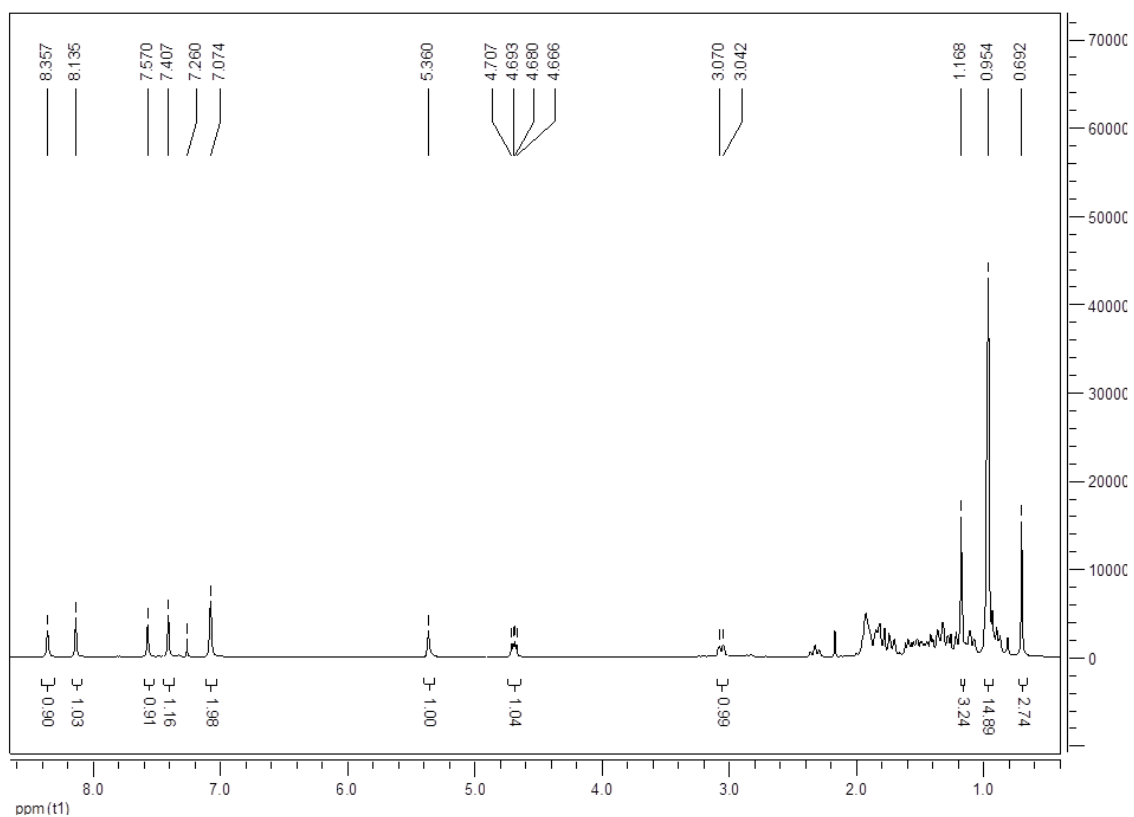

$^{13}\text{C}$  NMR spectrum for compound **15** recorded in  $\text{CDCl}_3$ .

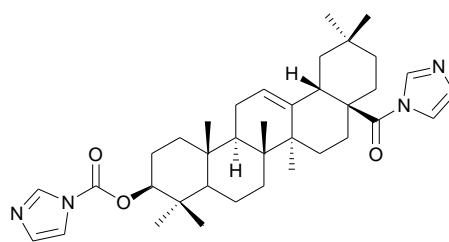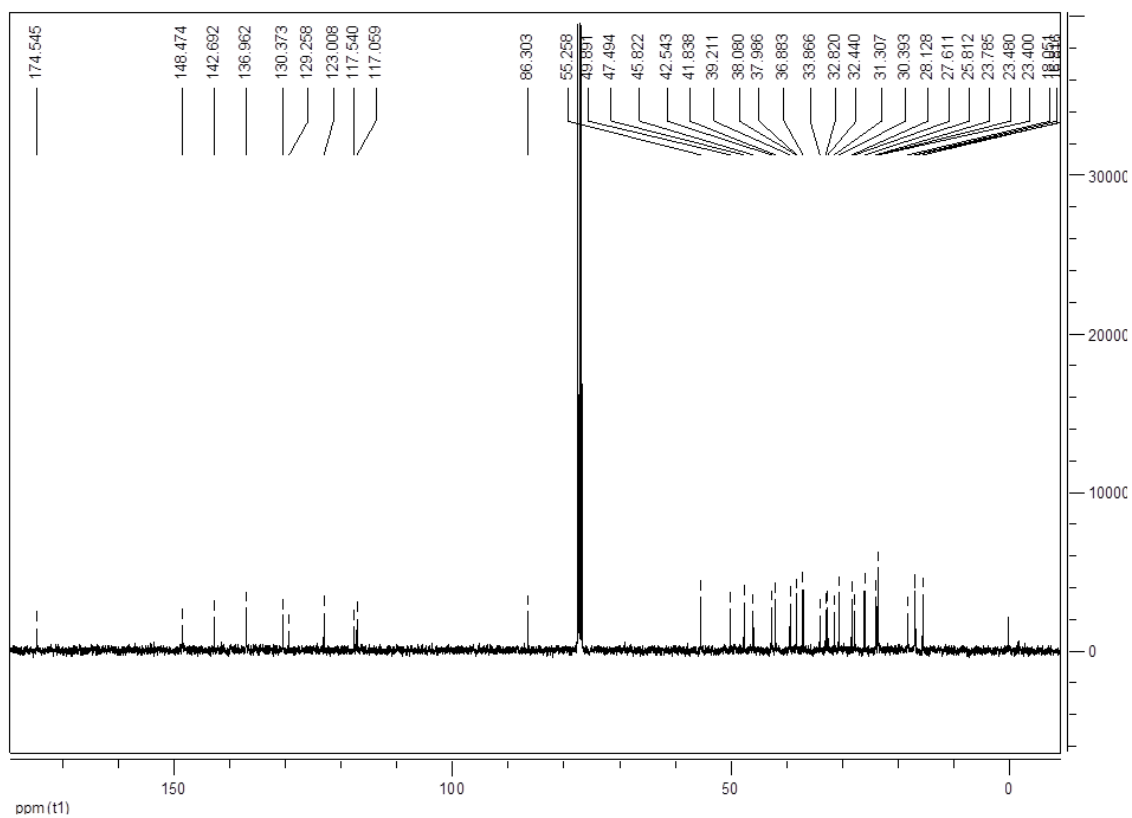

$^{13}\text{C}$  NMR spectrum detail of compound **15**.

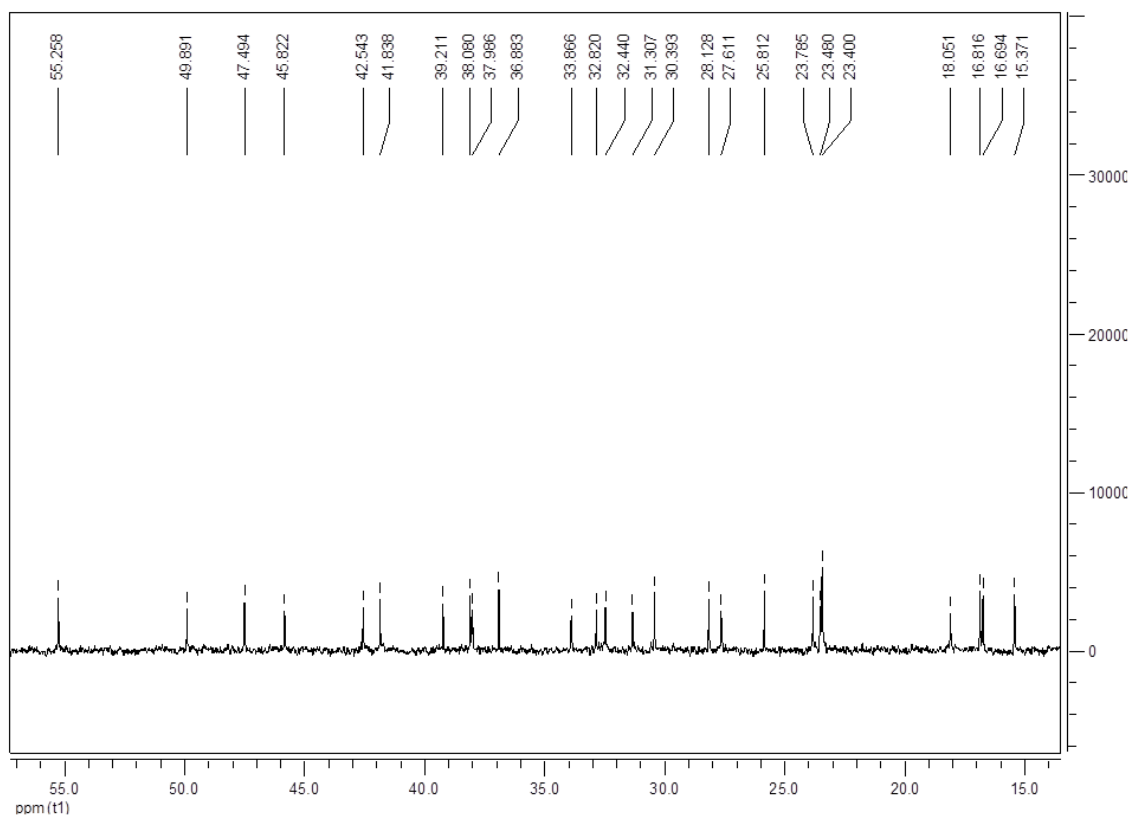

DEPT-135 NMR spectrum for compound **15** recorded in CDCl<sub>3</sub>

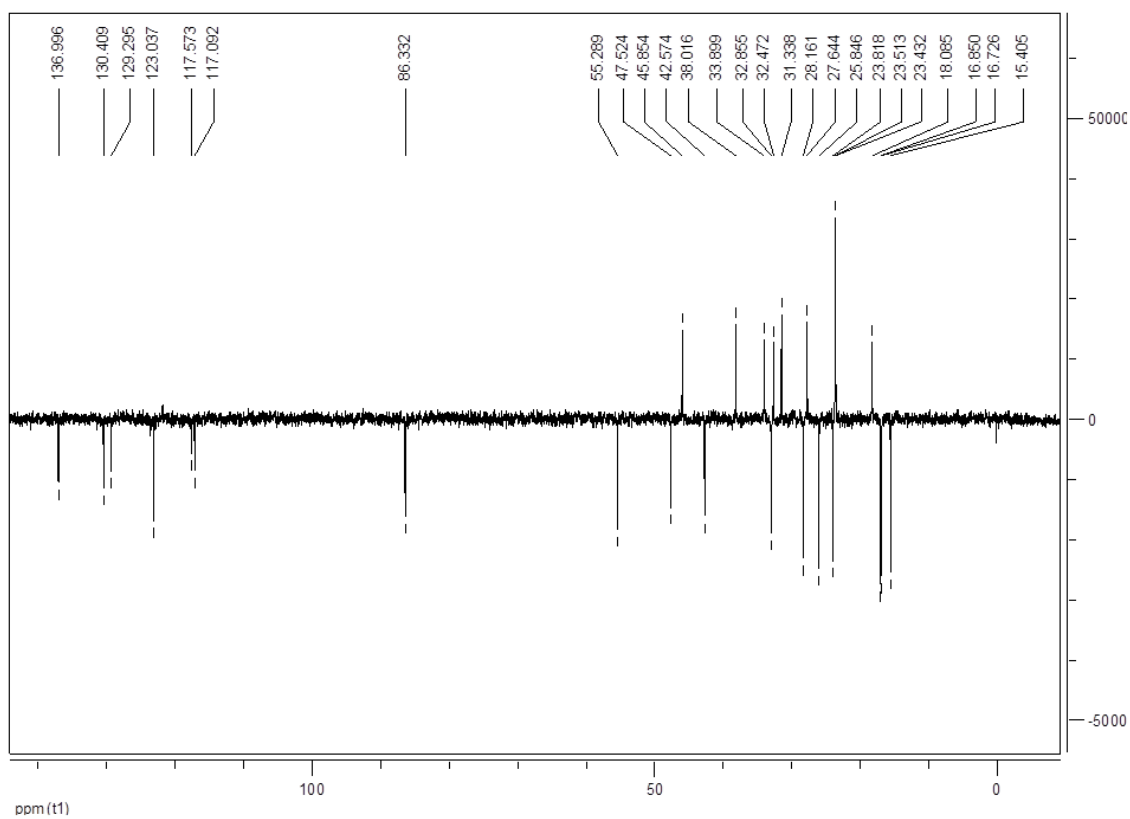

## 2. Spectral data for compound 16

$^1\text{H}$  NMR spectrum for compound **16** recorded in  $\text{CDCl}_3$ .

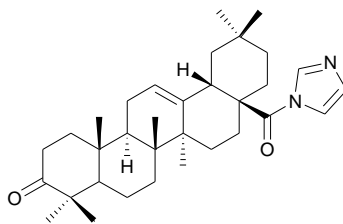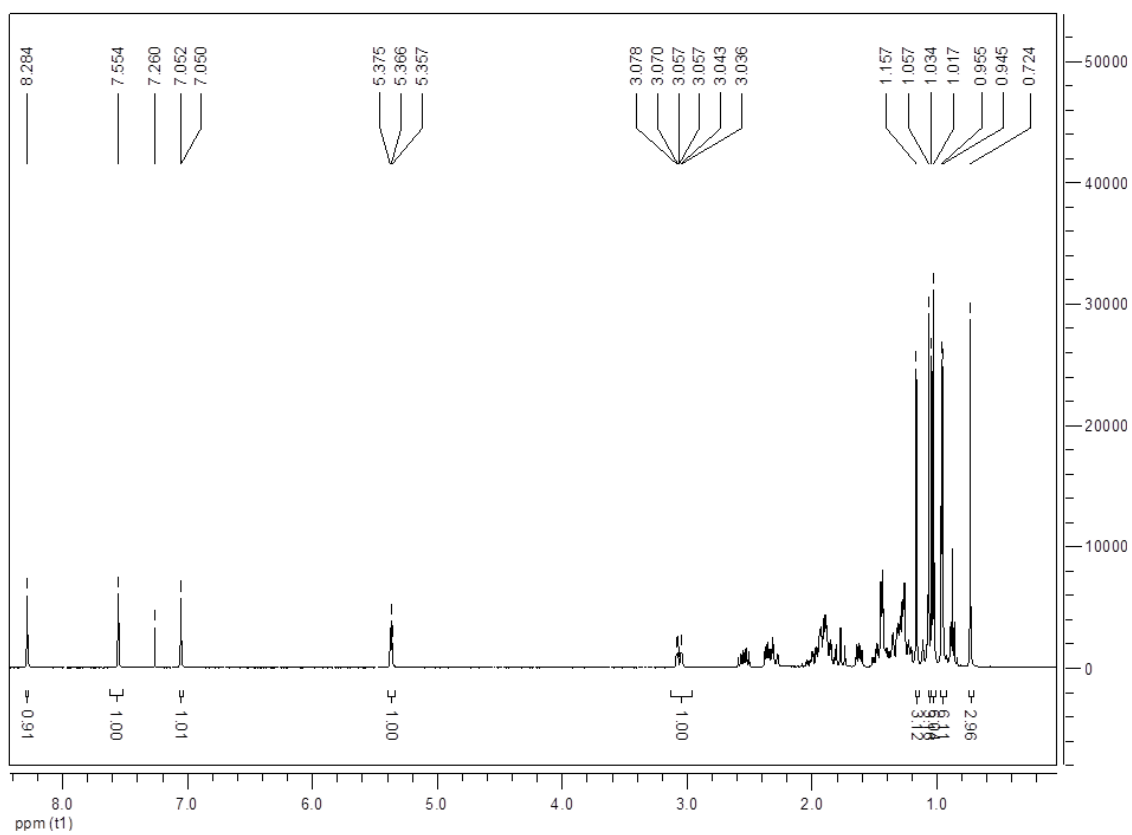

$^{13}\text{C}$  NMR spectrum for compound **16** recorded in  $\text{CDCl}_3$ .

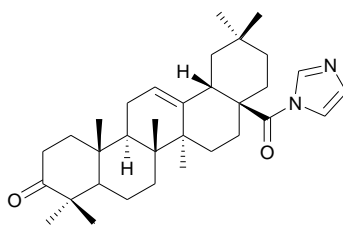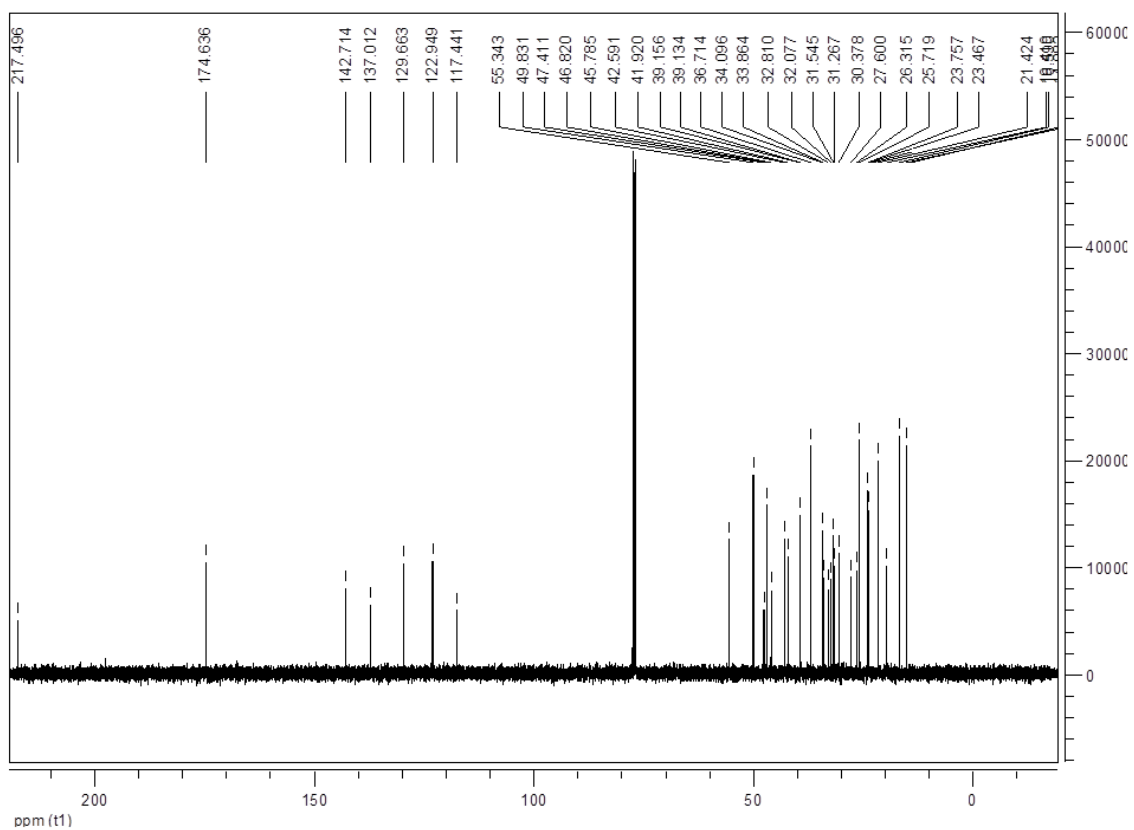

$^{13}\text{C}$  NMR spectrum detail of compound **16**.

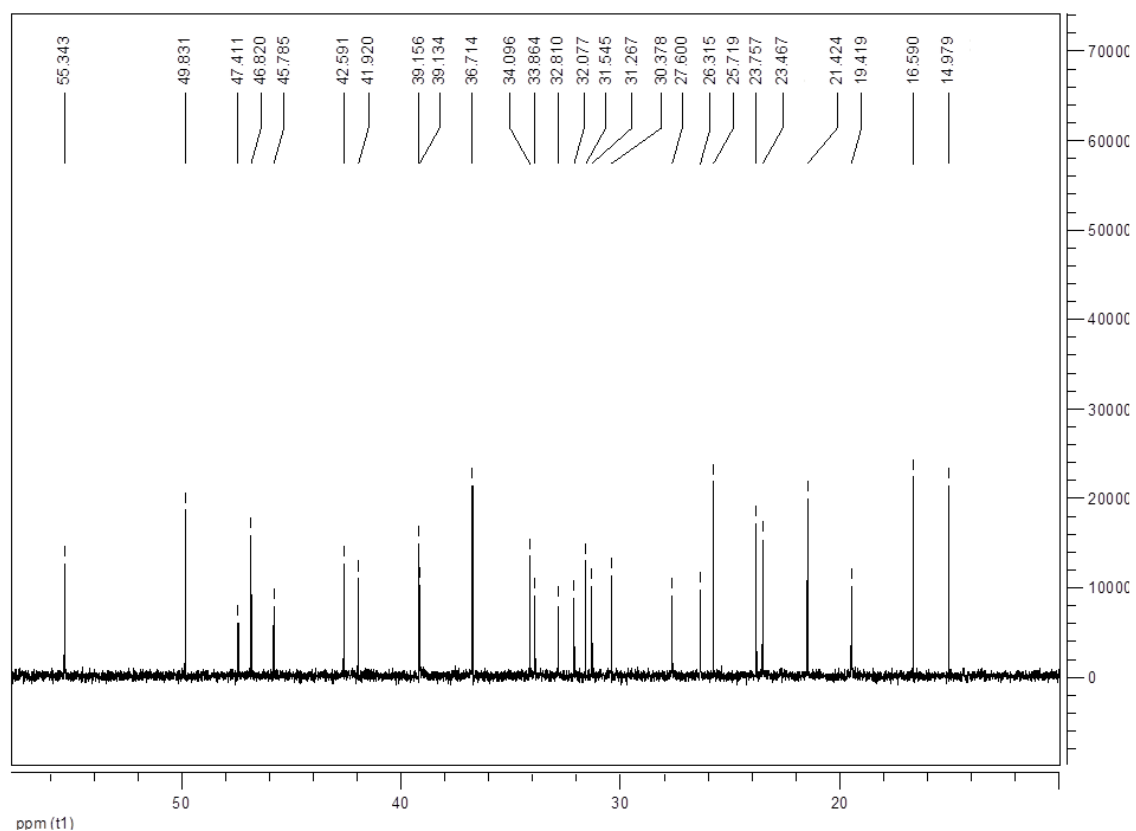



DEPT-135 NMR spectrum for compound **16** recorded in CDCl<sub>3</sub>.

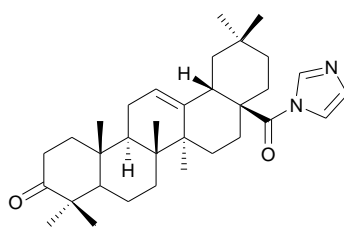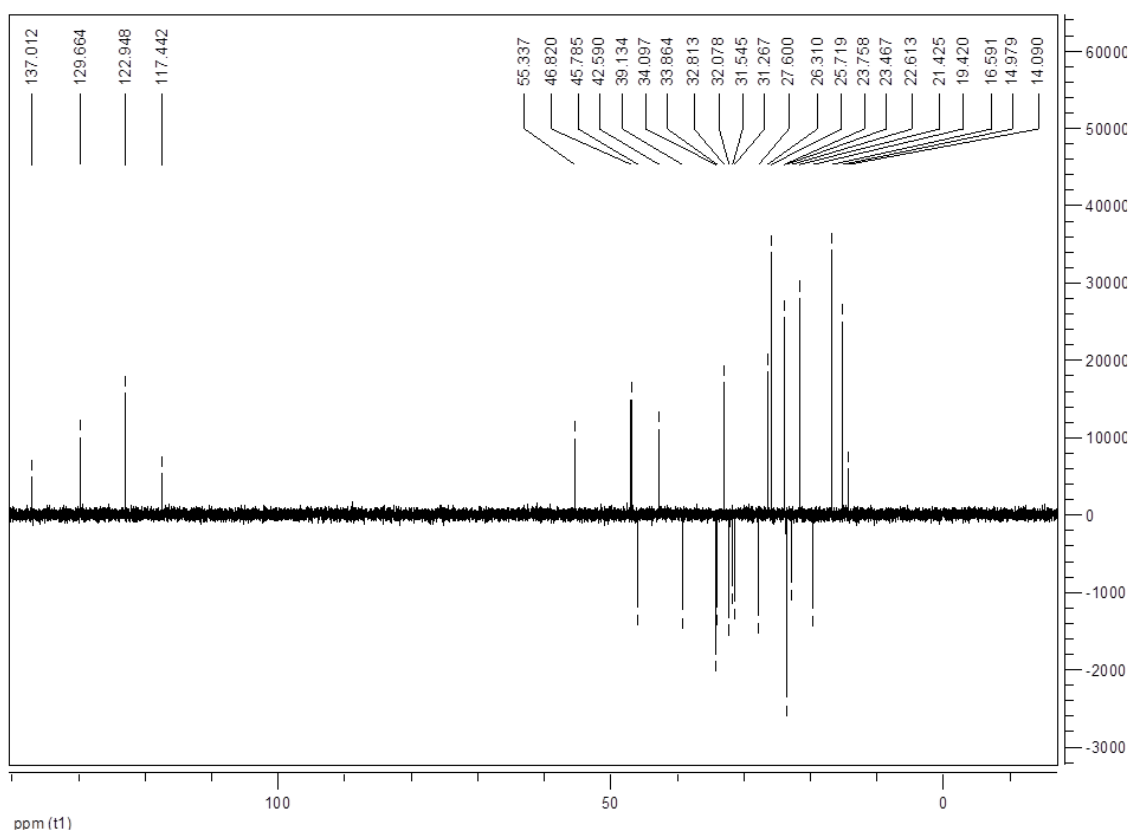

HMQC NMR spectrum for compound **16** recorded in CDCl<sub>3</sub>.

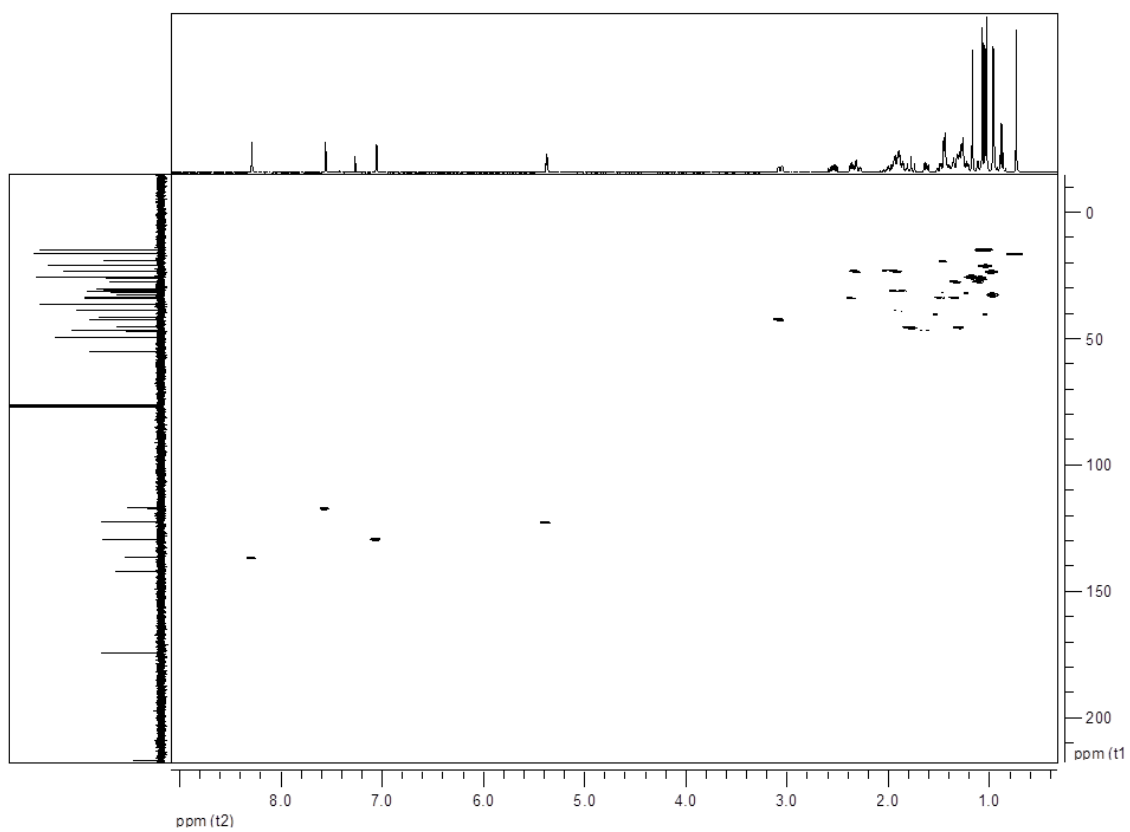

HMBC NMR spectrum for compound **16** recorded in CDCl<sub>3</sub>.

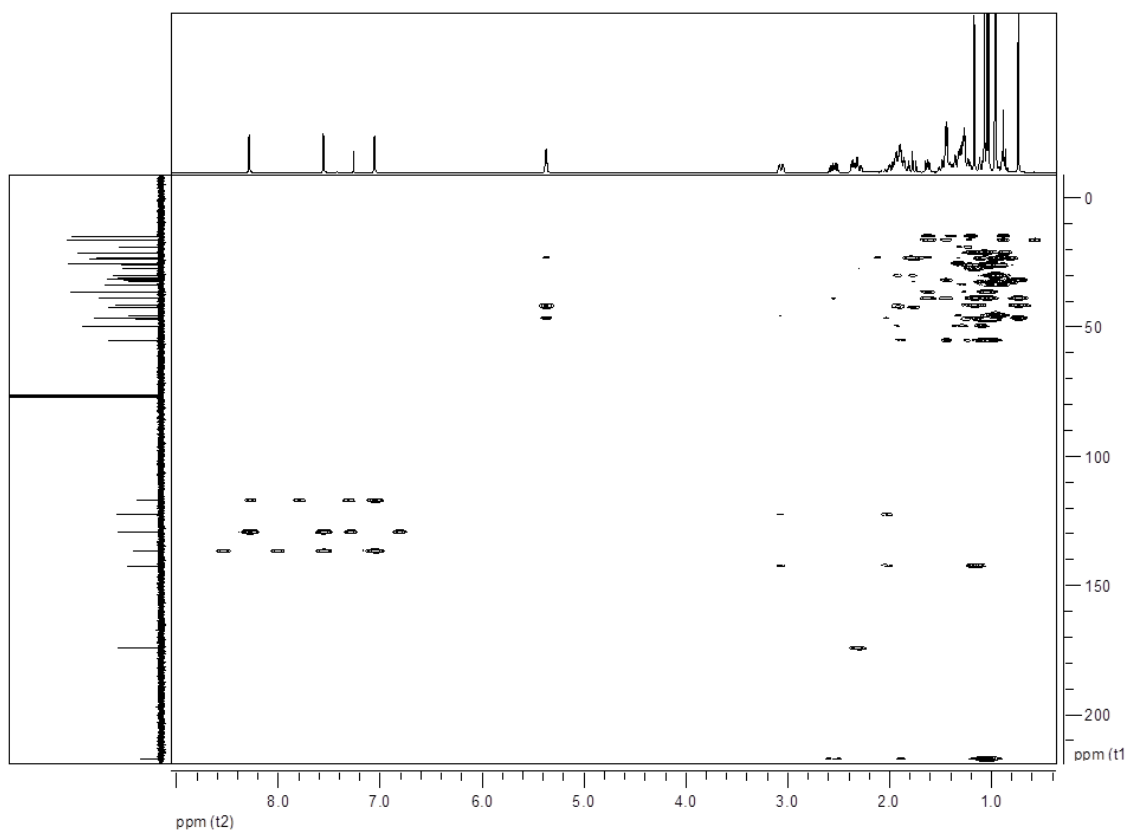

### 3. Spectral data for compound 17

$^1\text{H}$  NMR spectrum for compound 17 recorded in  $\text{CDCl}_3$ .

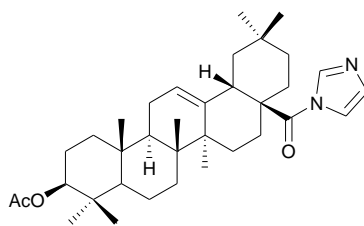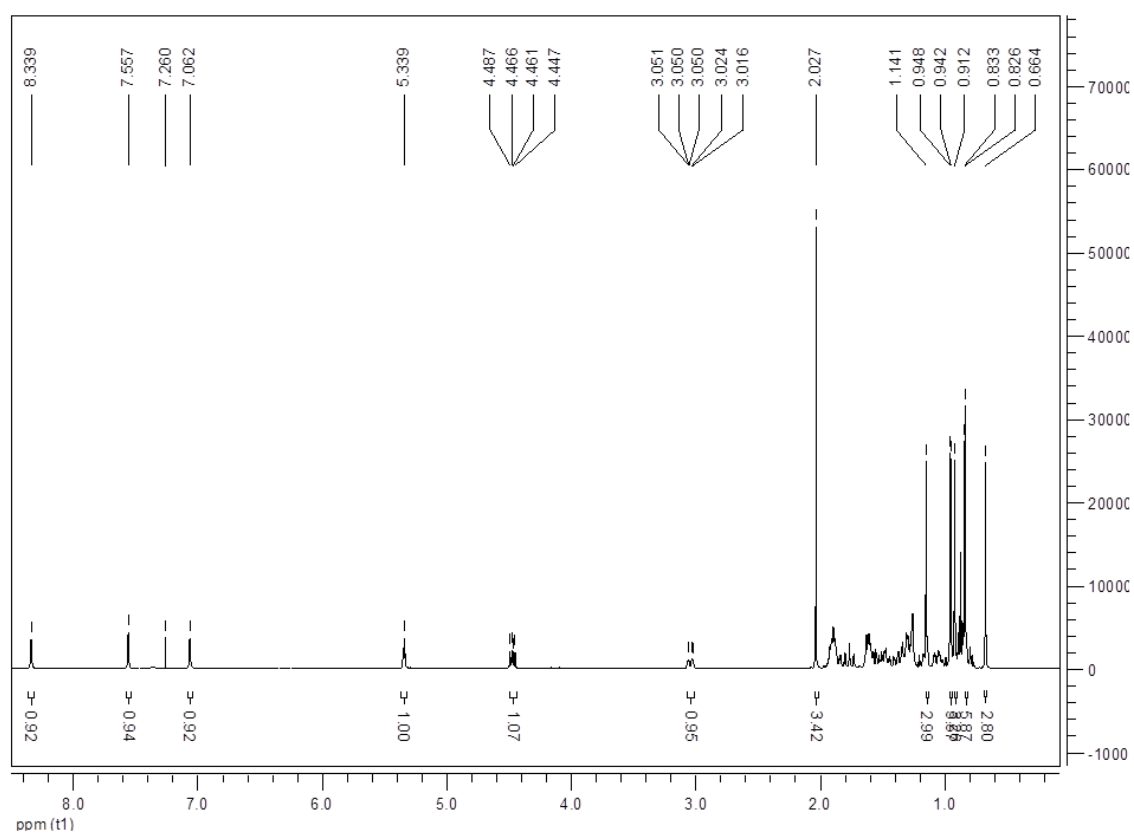

$^{13}\text{C}$  NMR spectrum for compound **17** recorded in  $\text{CDCl}_3$ .

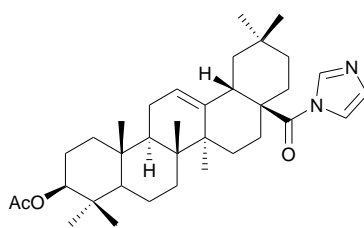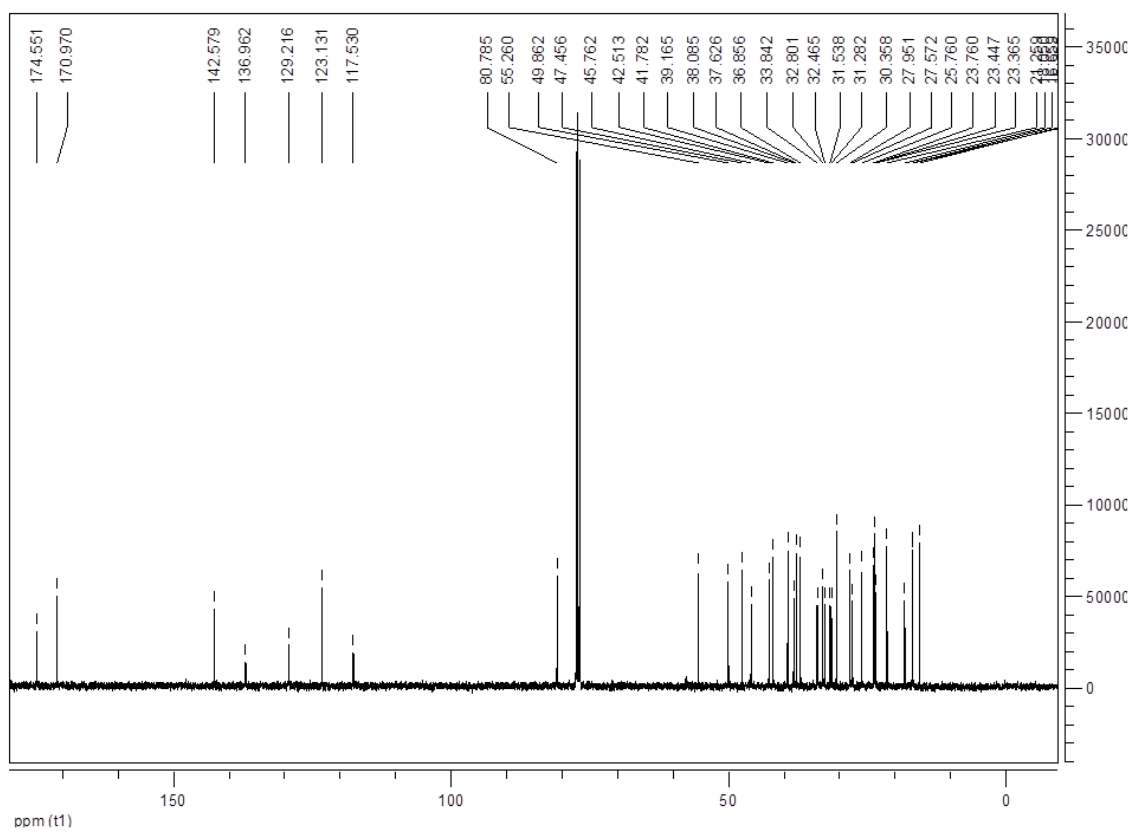

$^{13}\text{C}$  NMR spectrum detail of compound **17**.

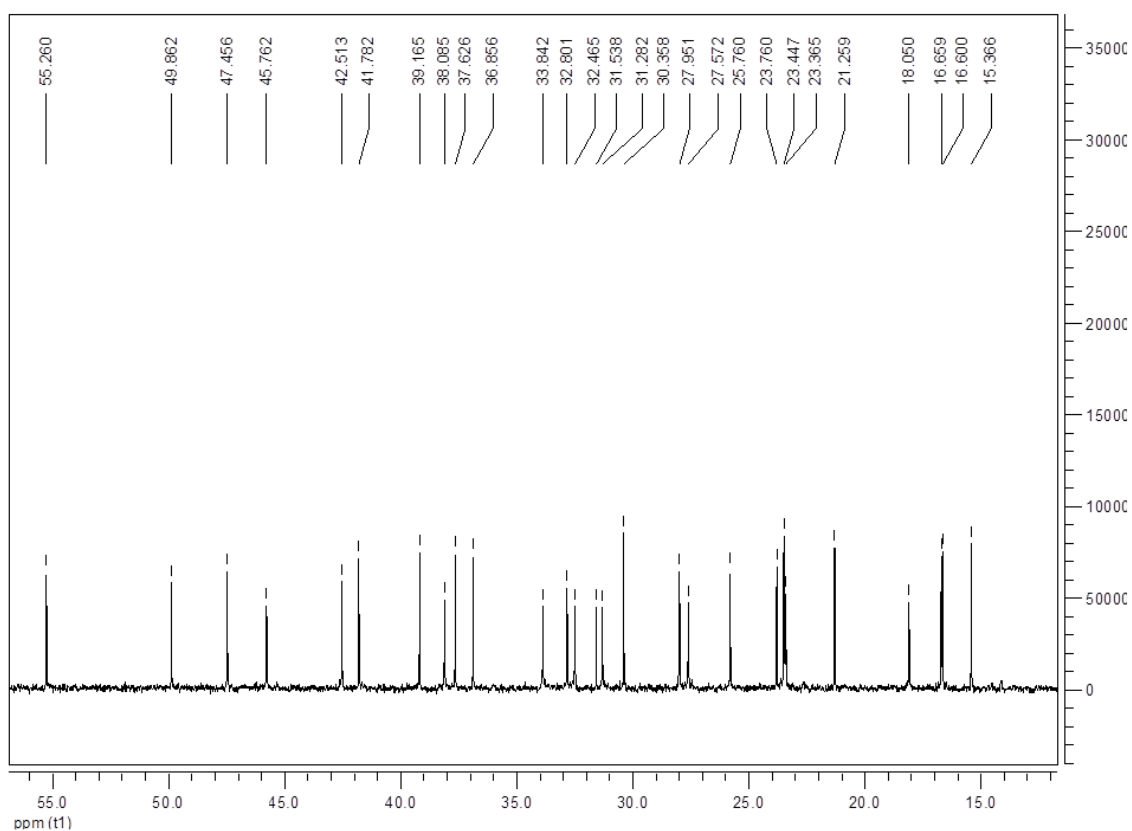

DEPT-135 NMR spectrum for compound **17** recorded in CDCl<sub>3</sub>.

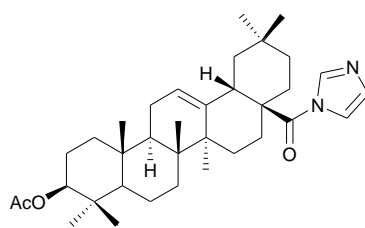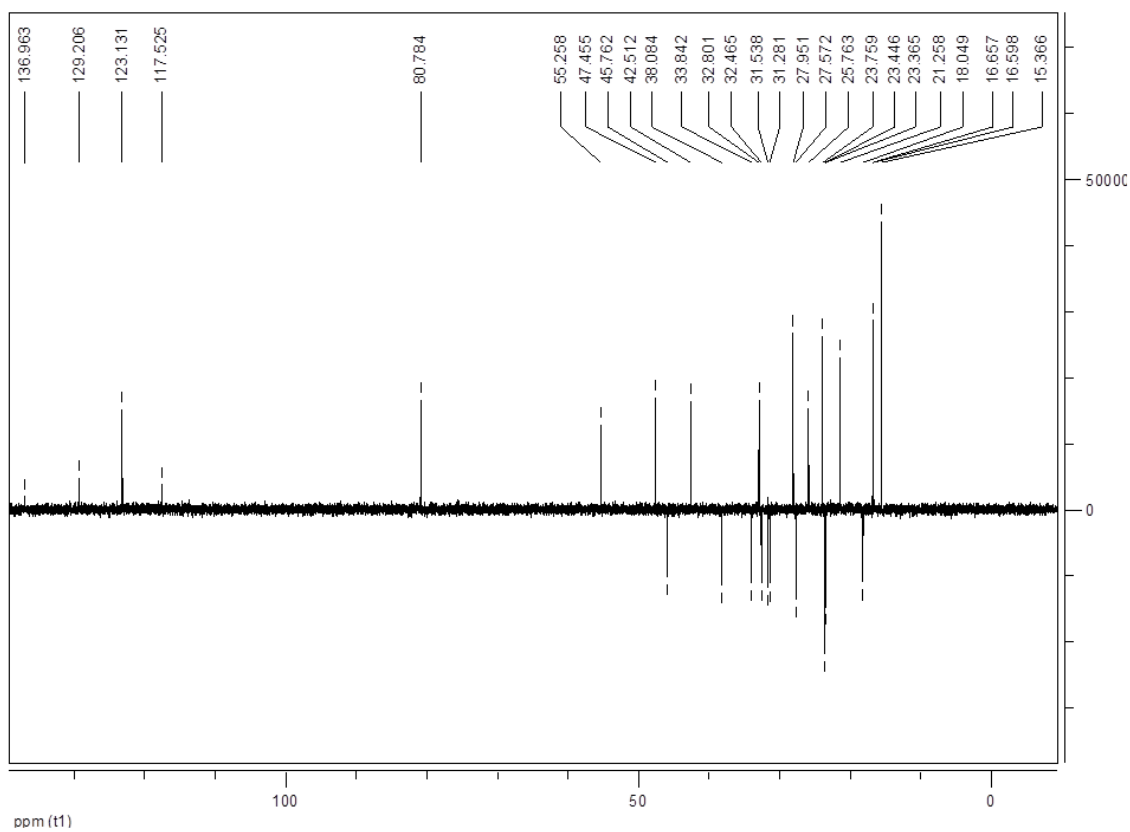

HMQC NMR spectrum for compound **17** recorded in CDCl<sub>3</sub>.

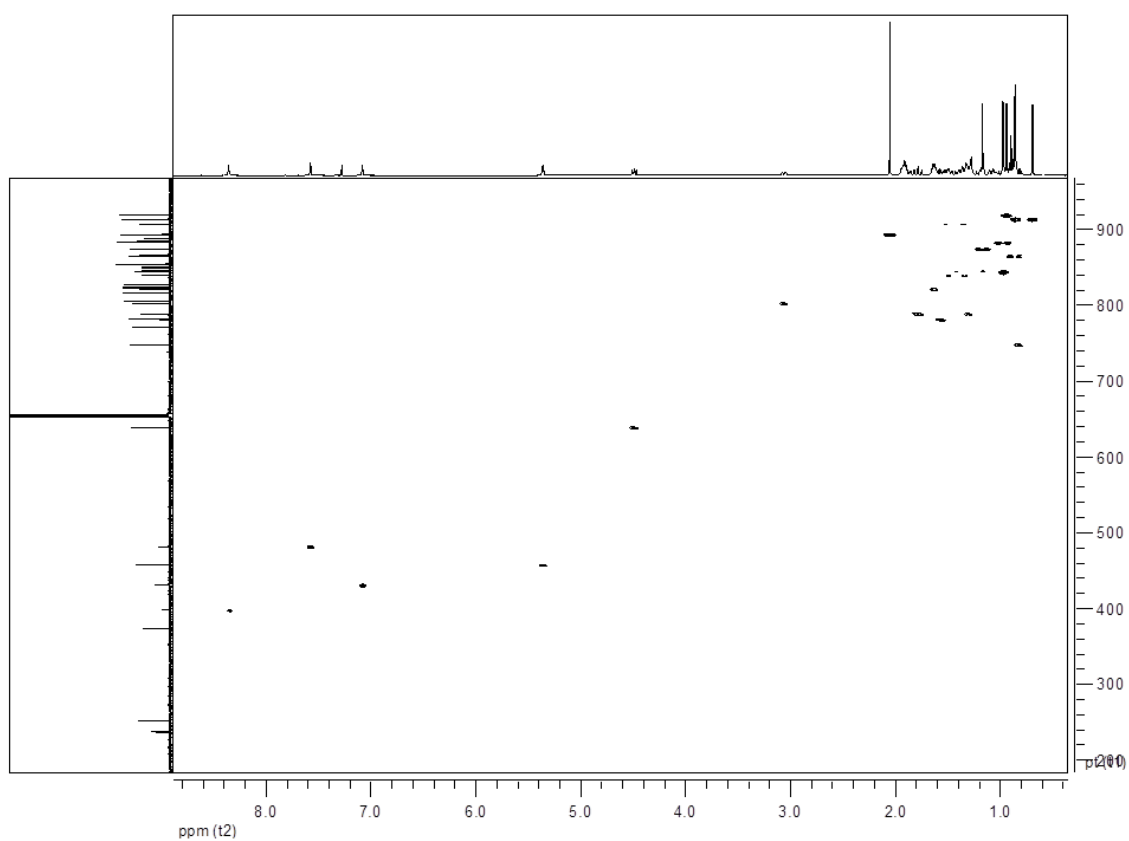



HMBC NMR spectrum for compound **17** recorded in CDCl<sub>3</sub>.

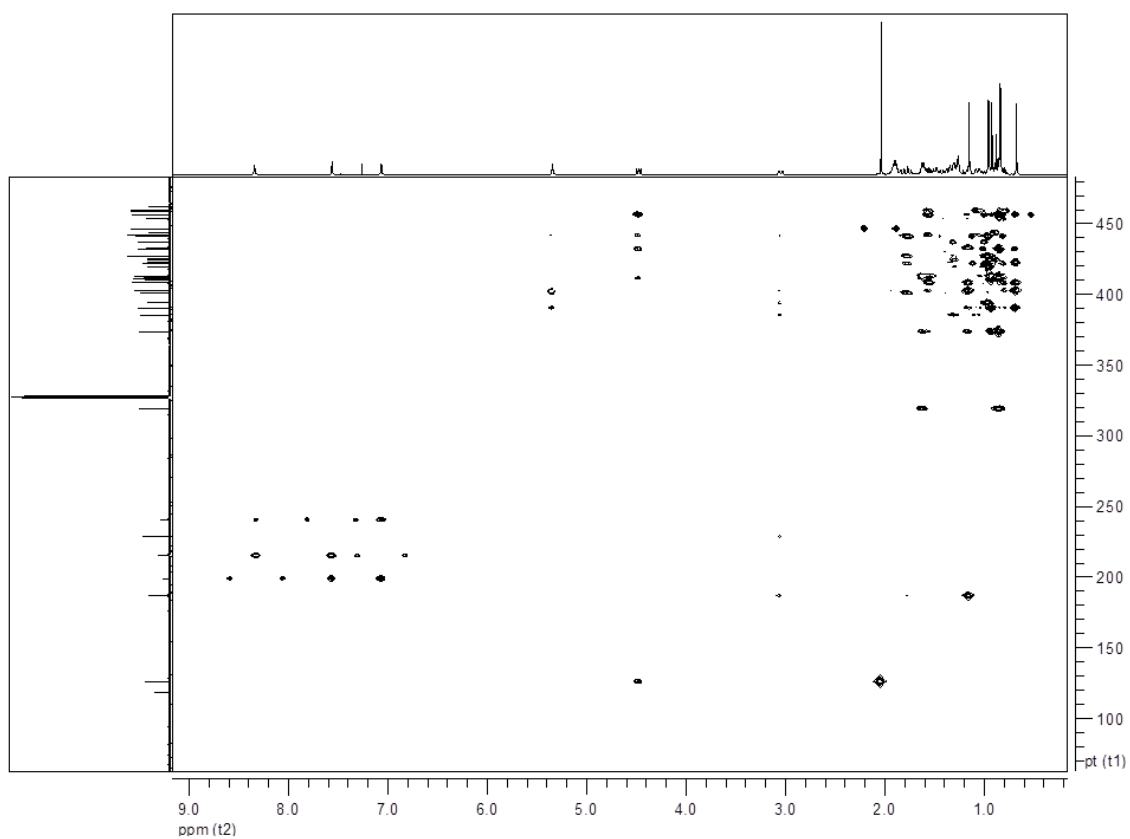

#### 4. Spectral data for compound **18**

$^1\text{H}$  NMR spectrum for compound **18** recorded in  $\text{CDCl}_3$ .

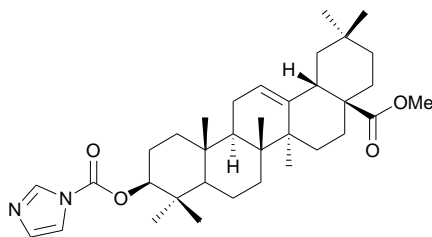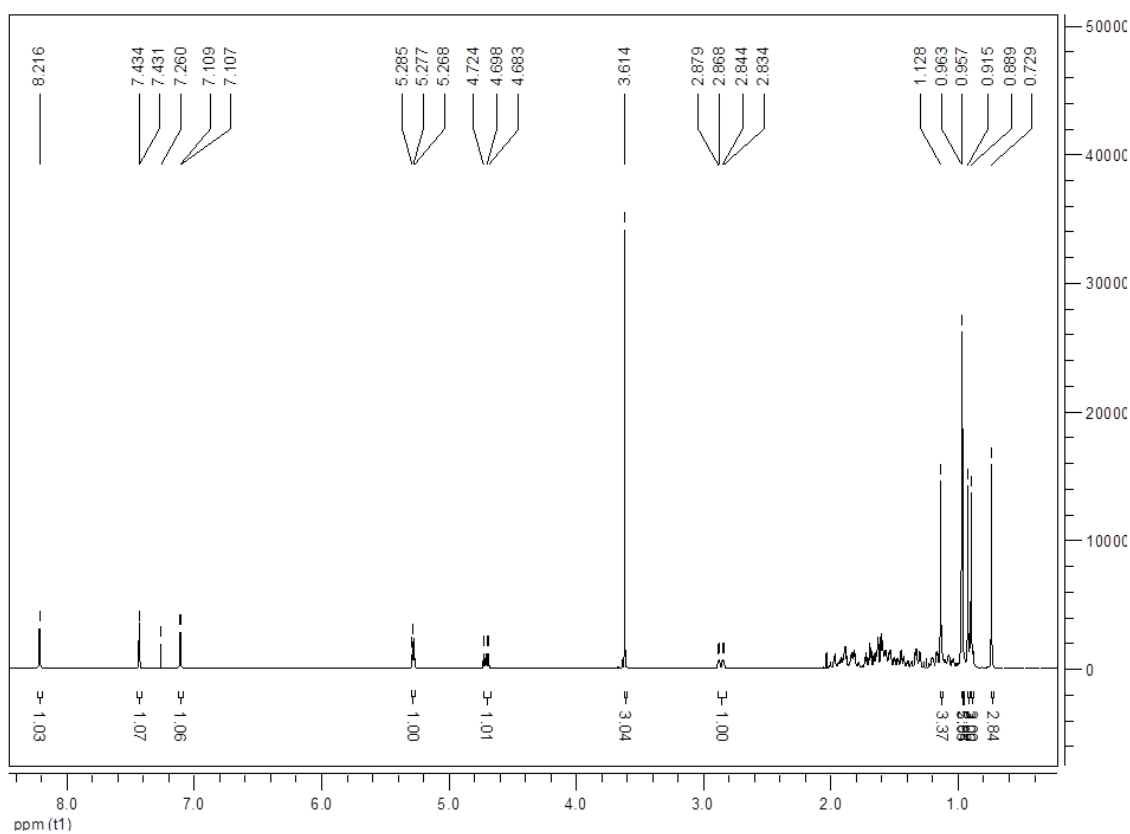

$^{13}\text{C}$  NMR spectrum for compound **18** recorded in  $\text{CDCl}_3$ .

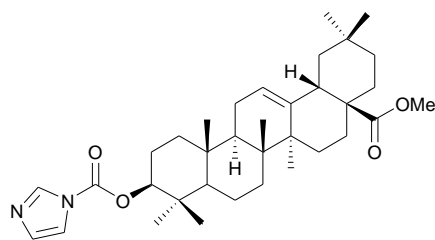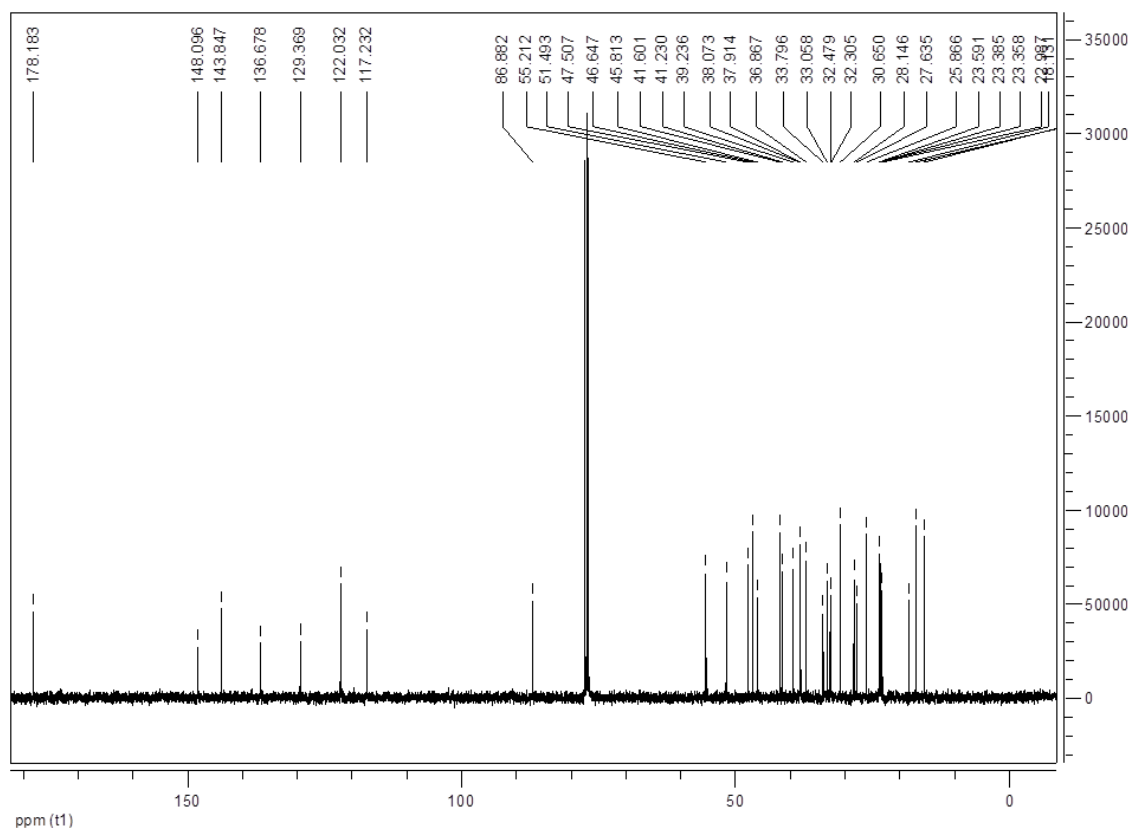

$^{13}\text{C}$  NMR spectrum detail of compound **18**.

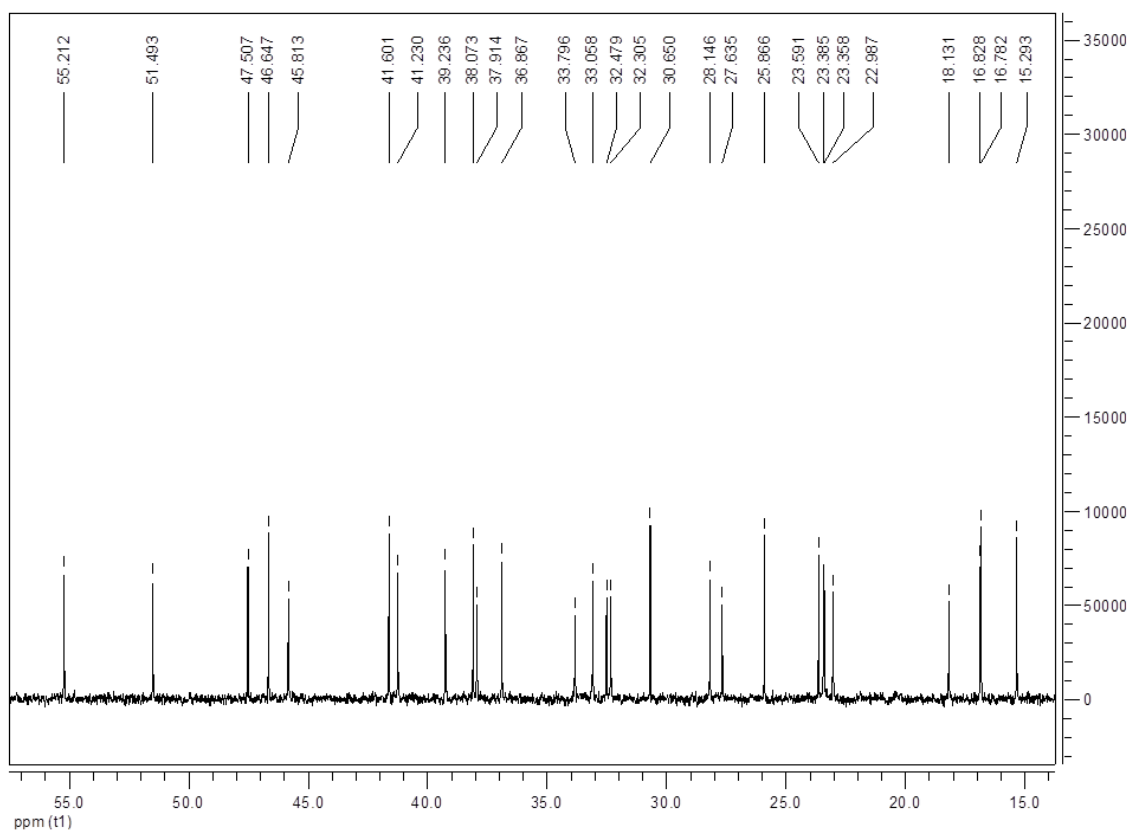

DEPT-135 NMR spectrum for compound **18** recorded in CDCl<sub>3</sub>.

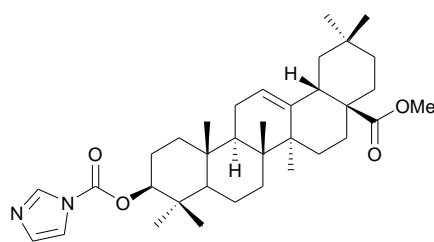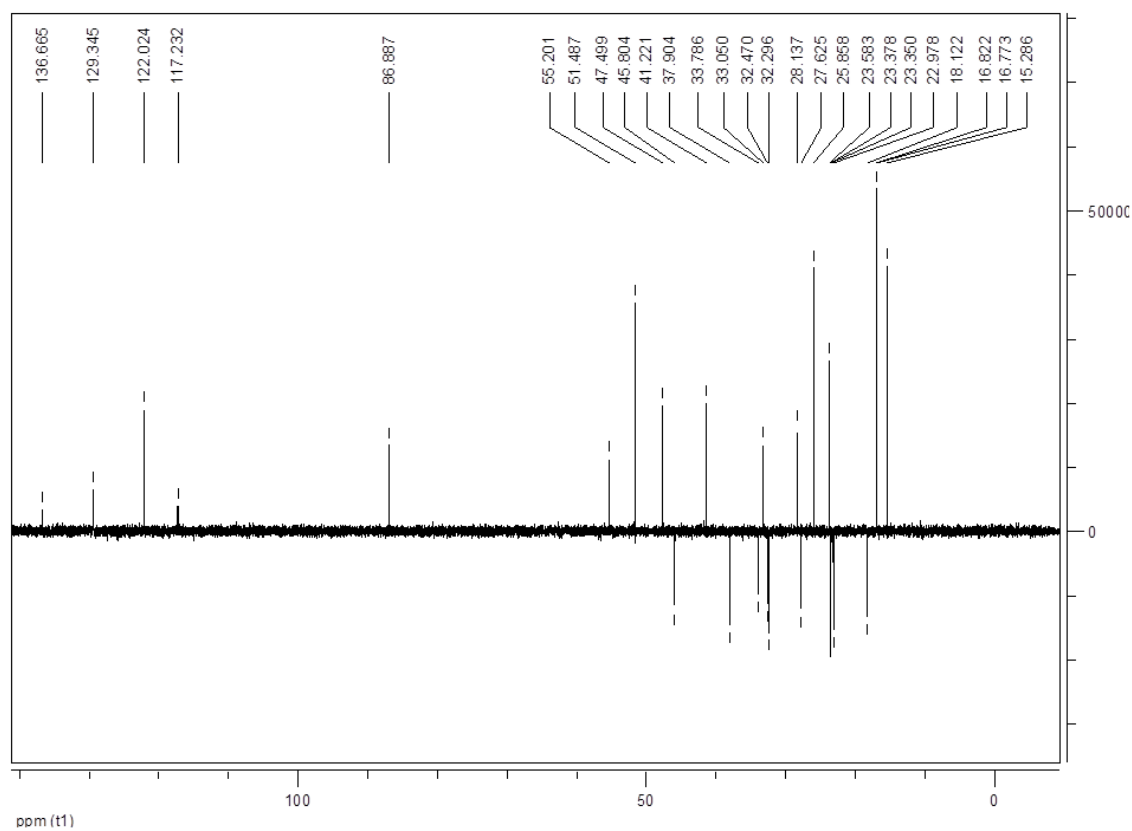

HMQC NMR spectrum for compound **18** recorded in CDCl<sub>3</sub>.

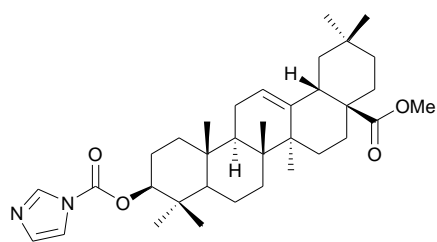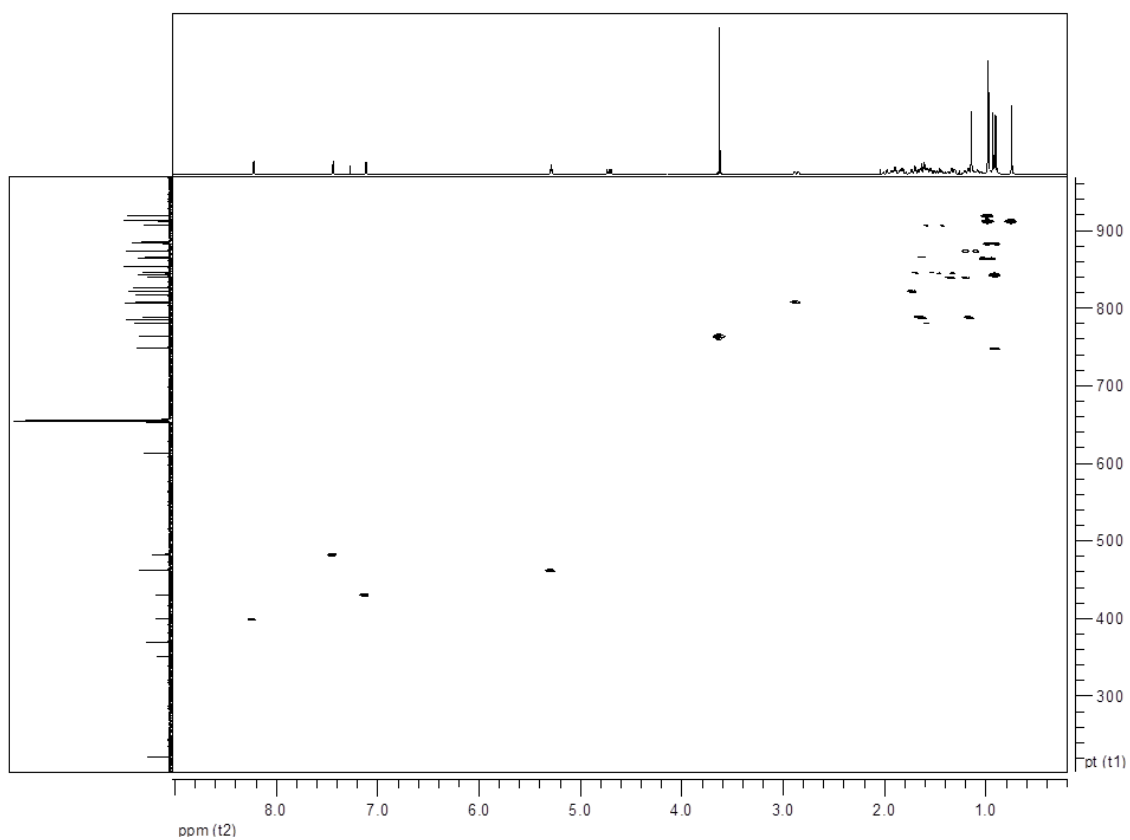

HMBC NMR spectrum for compound **18** recorded in CDCl<sub>3</sub>.

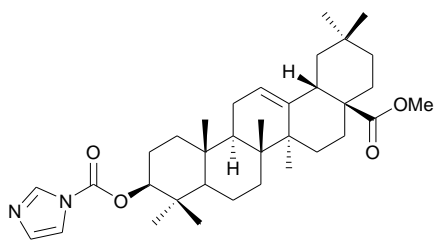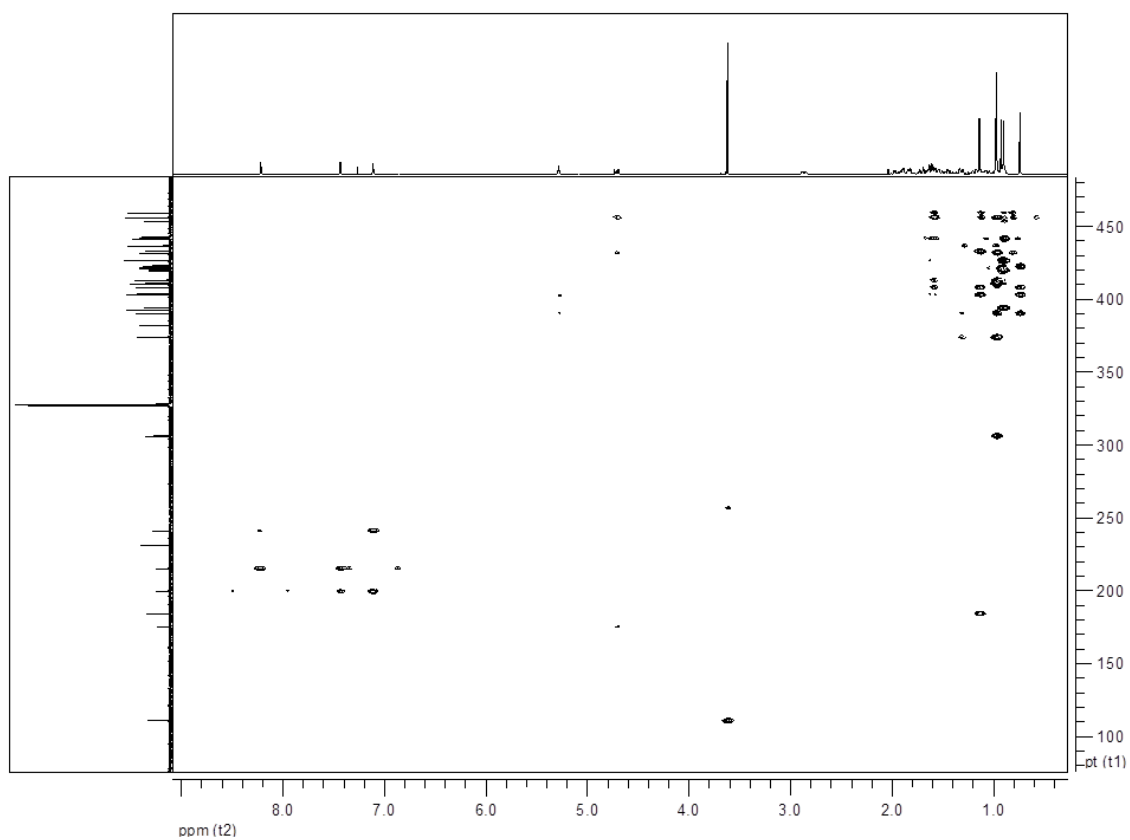

## 5. Spectral data for compound **19**

$^1\text{H}$  NMR spectrum for compound **19** recorded in  $\text{CDCl}_3$ .

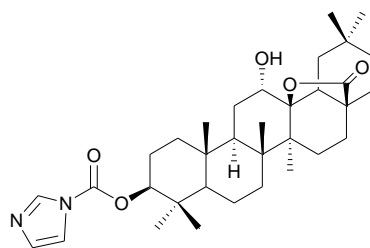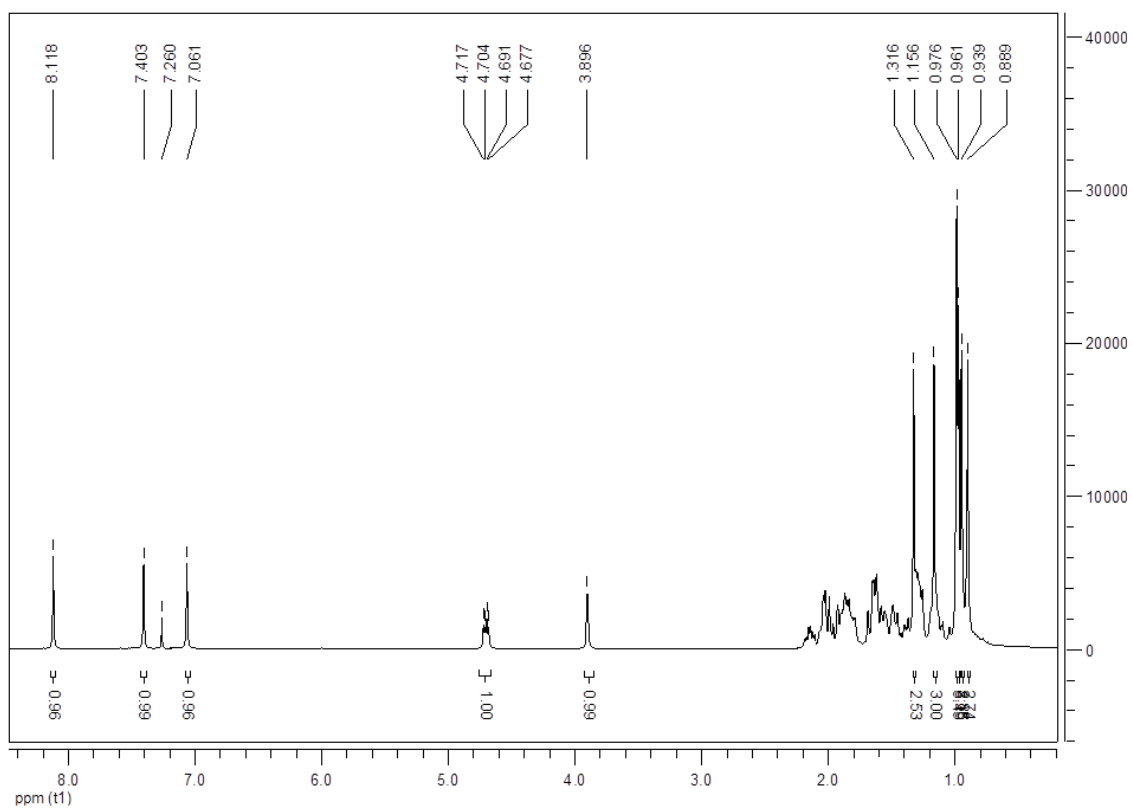



$^{13}\text{C}$  NMR spectrum for compound **19** recorded in  $\text{CDCl}_3$ .

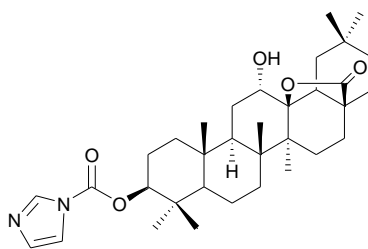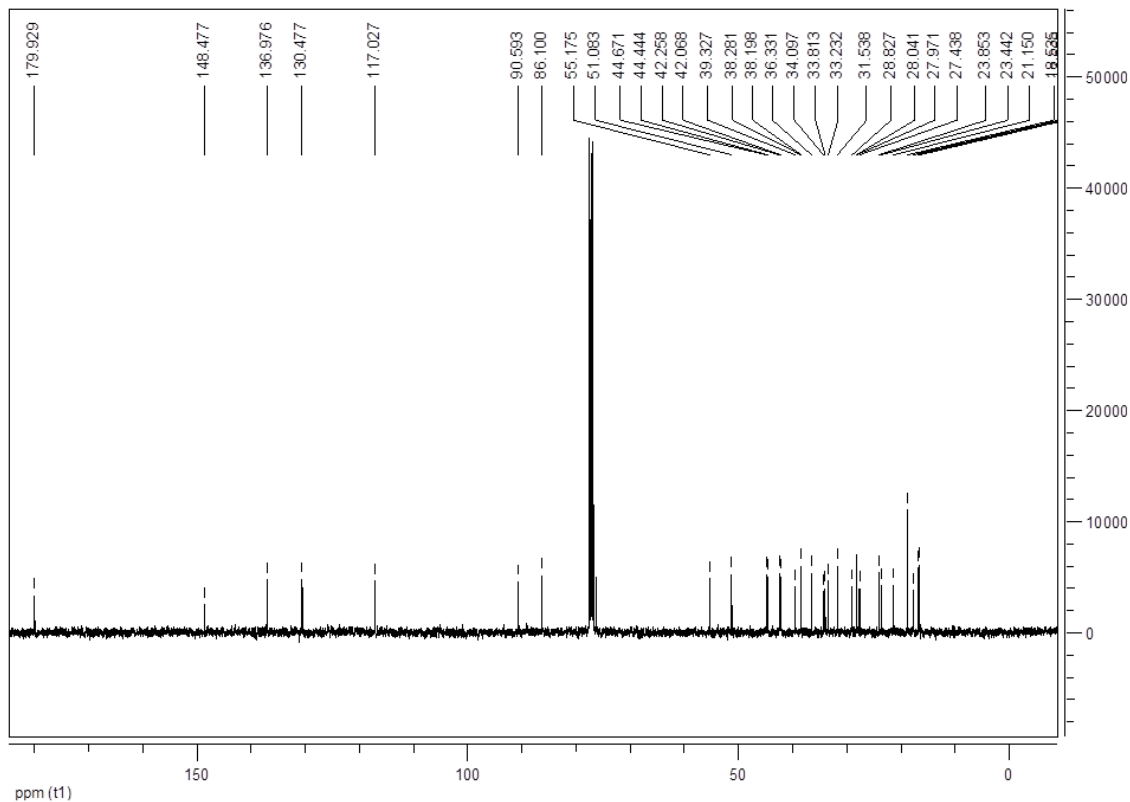

$^{13}\text{C}$  NMR spectrum detail of compound **19**.

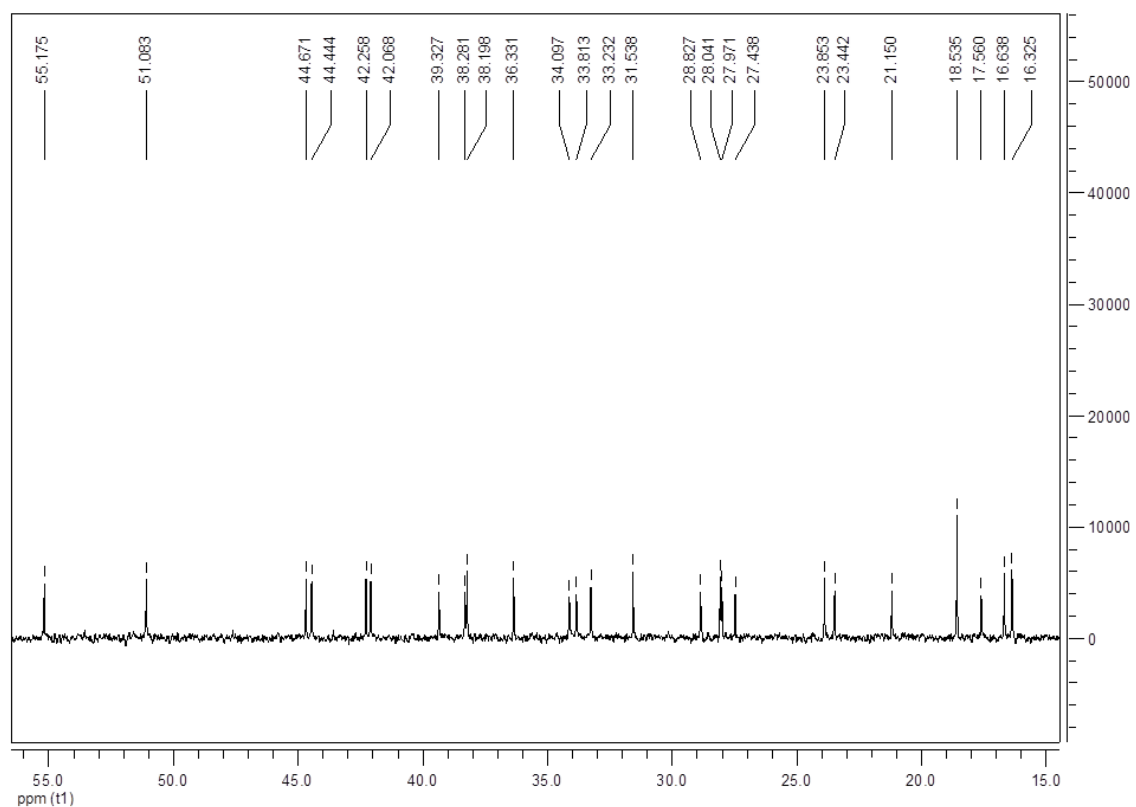

DEPT-135 NMR spectrum for compound **19** recorded in CDCl<sub>3</sub>.

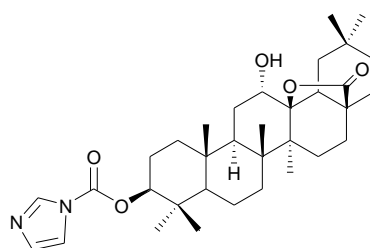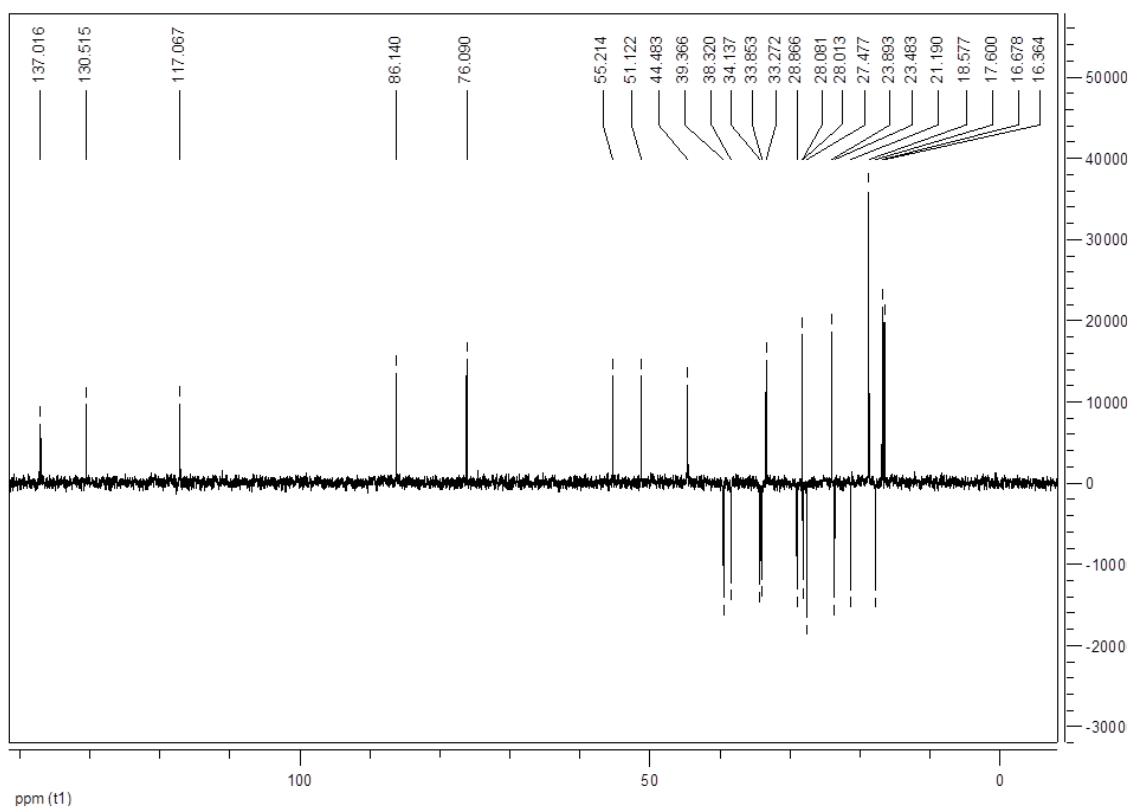

## 6. Spectral data for compound 20

$^1\text{H}$  NMR spectrum for compound **20** recorded in  $\text{CDCl}_3$ .

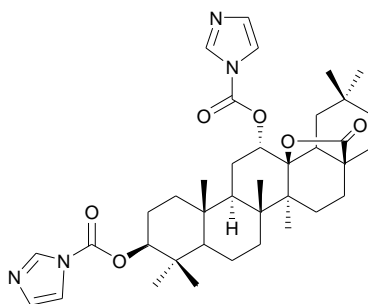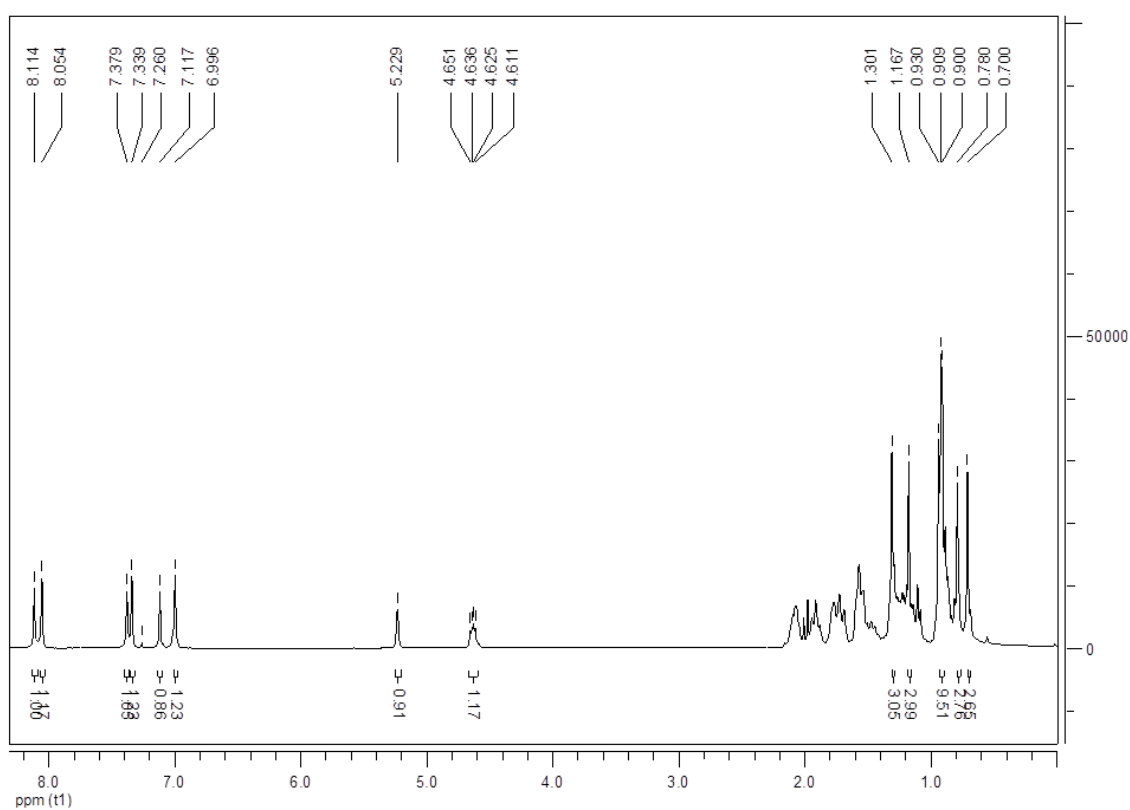

$^{13}\text{C}$  NMR spectrum for compound **20** recorded in  $\text{CDCl}_3$ .

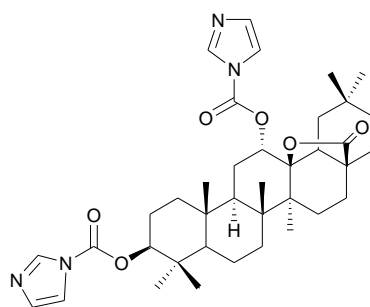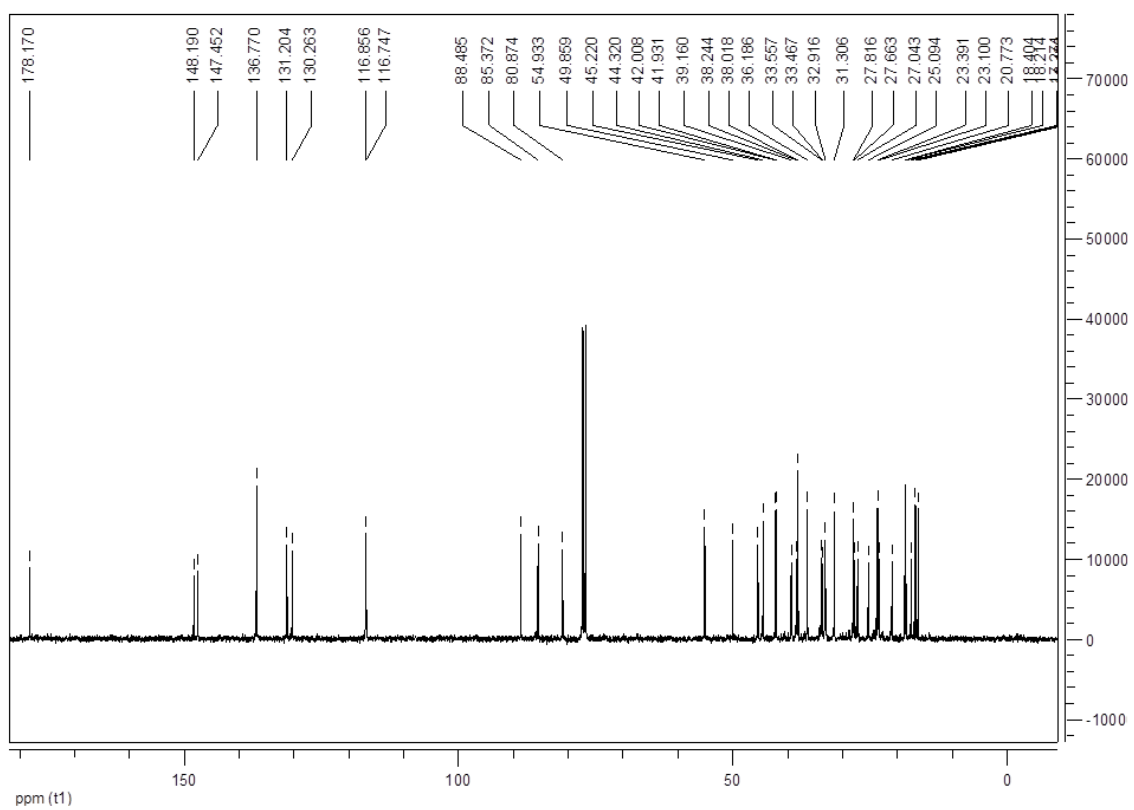

$^{13}\text{C}$  NMR spectrum detail of compound **20**.

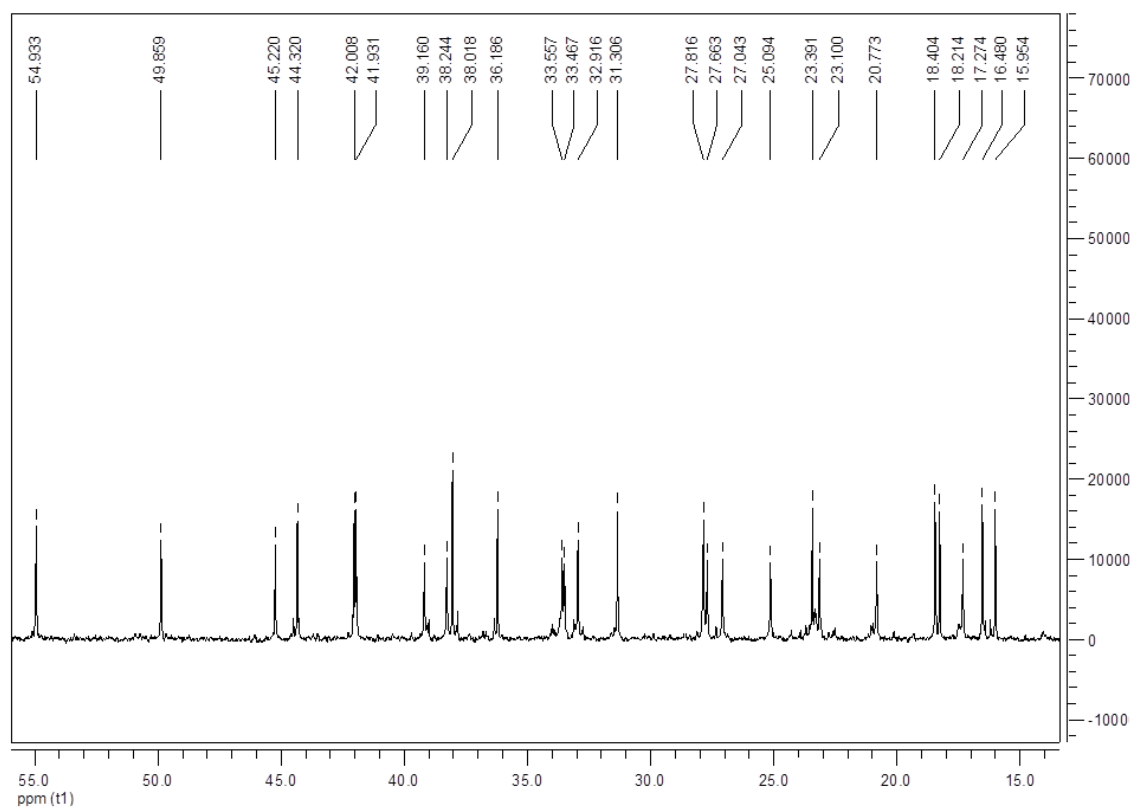

DEPT-135 NMR spectrum for compound **20** recorded in CDCl<sub>3</sub>.

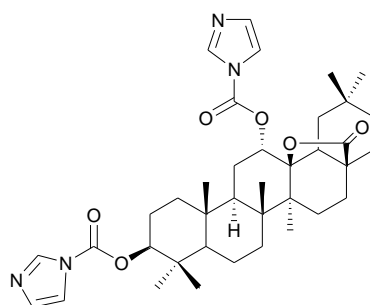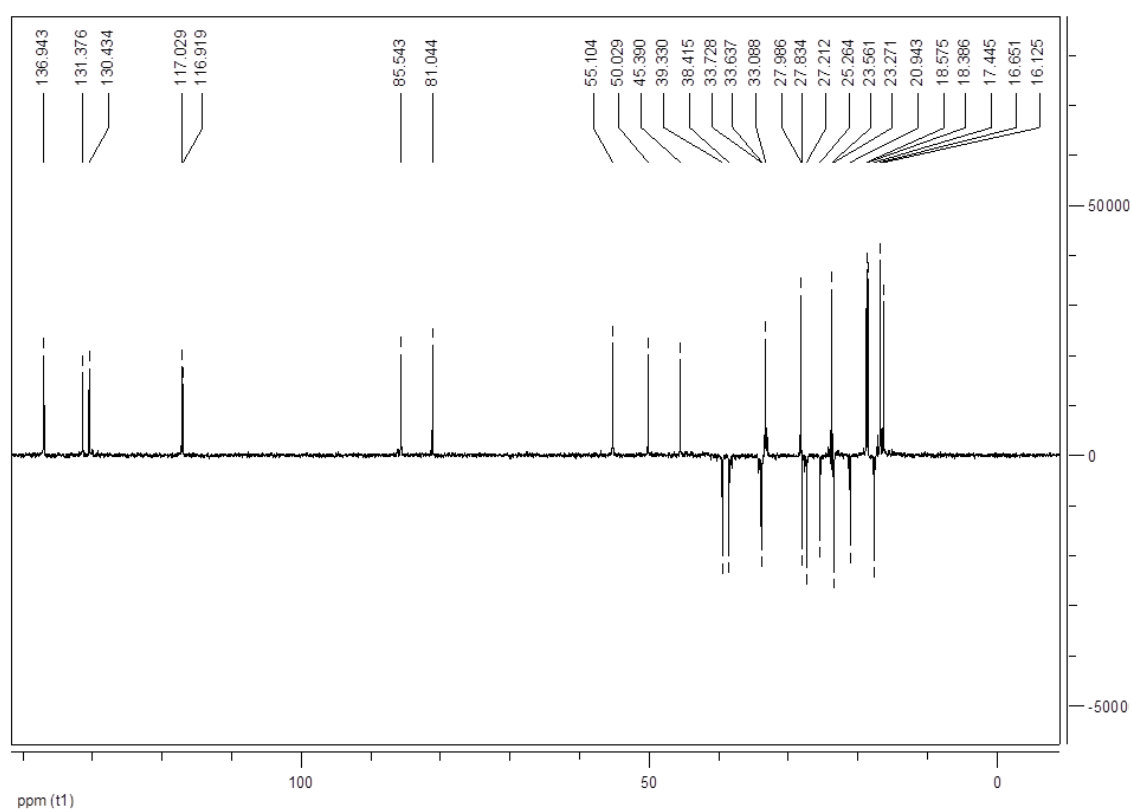

HMQC NMR spectrum for compound **20** recorded in CDCl<sub>3</sub>.

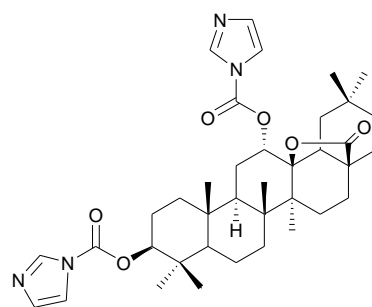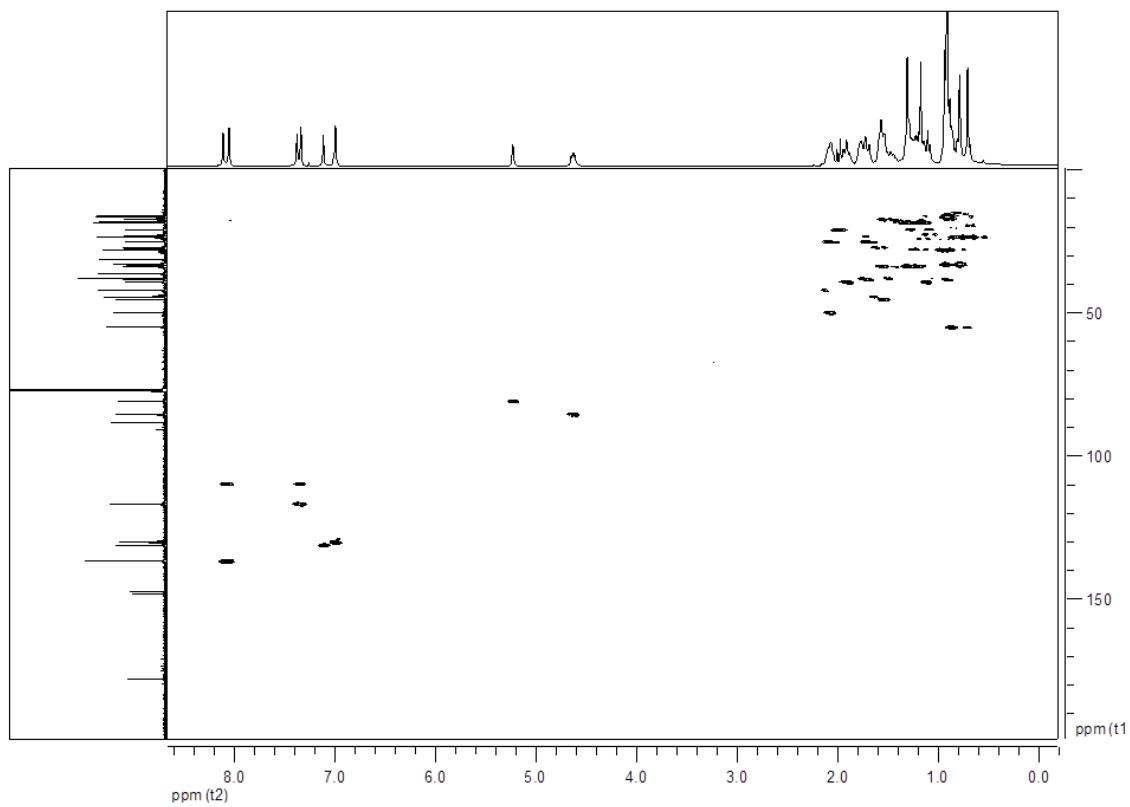



HMBC NMR spectrum for compound **20** recorded in CDCl<sub>3</sub>.

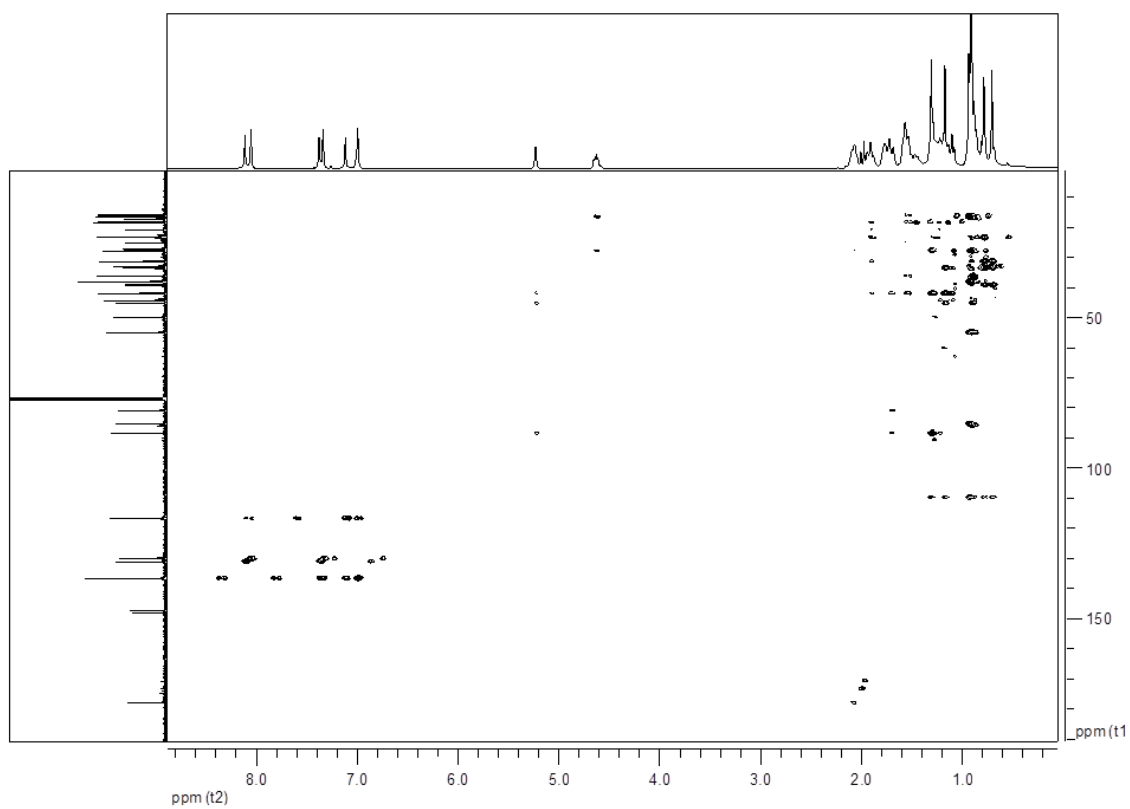

## 7. Spectral data for compound **21**

$^1\text{H}$  NMR spectrum for compound **21** recorded in  $\text{CDCl}_3$ .

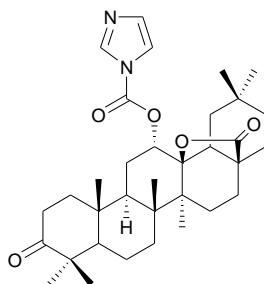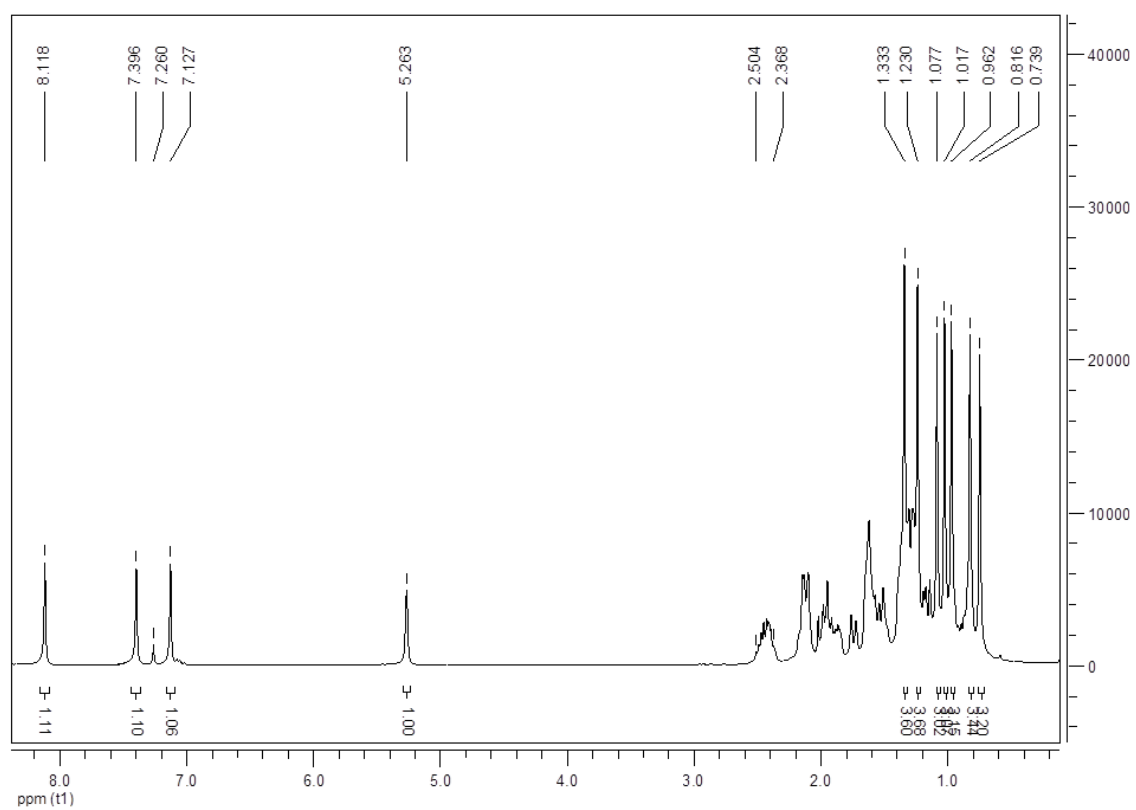

$^{13}\text{C}$  NMR spectrum for compound **21** recorded in  $\text{CDCl}_3$ .

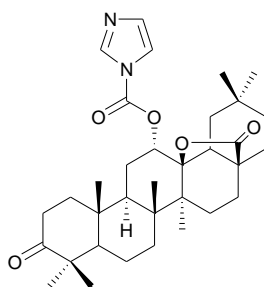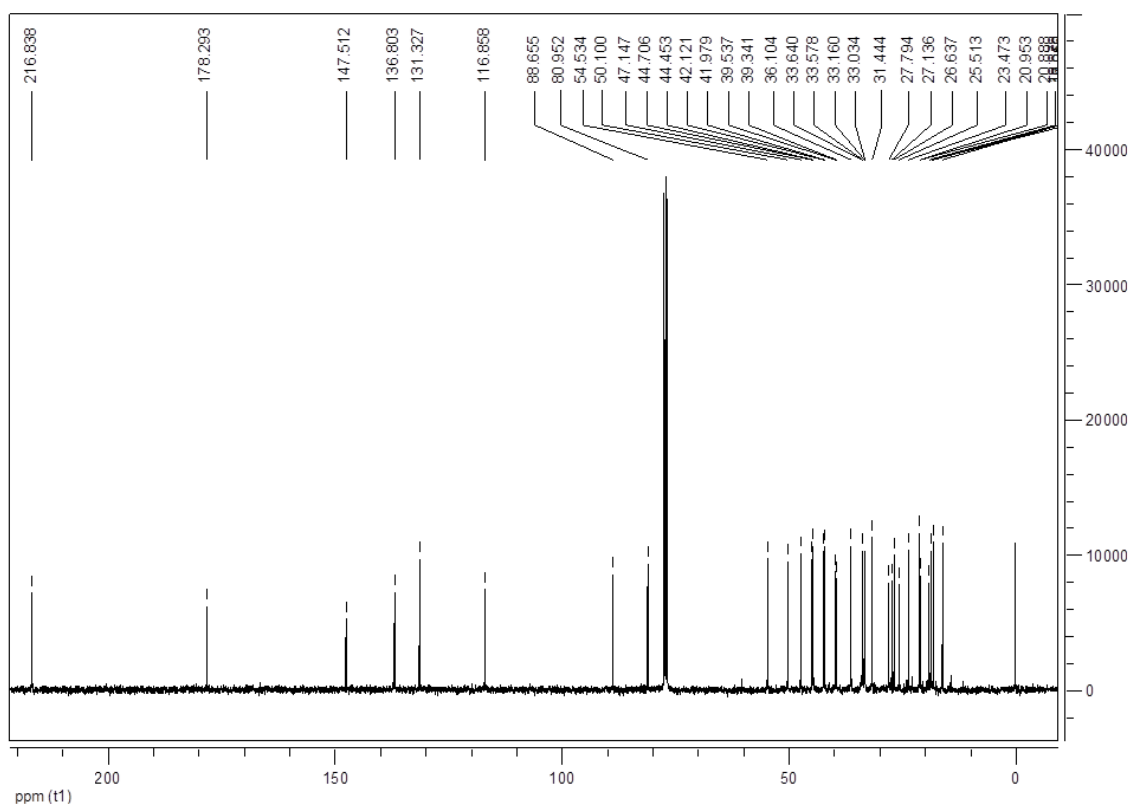

$^{13}\text{C}$  NMR spectrum detail of compound **21**.

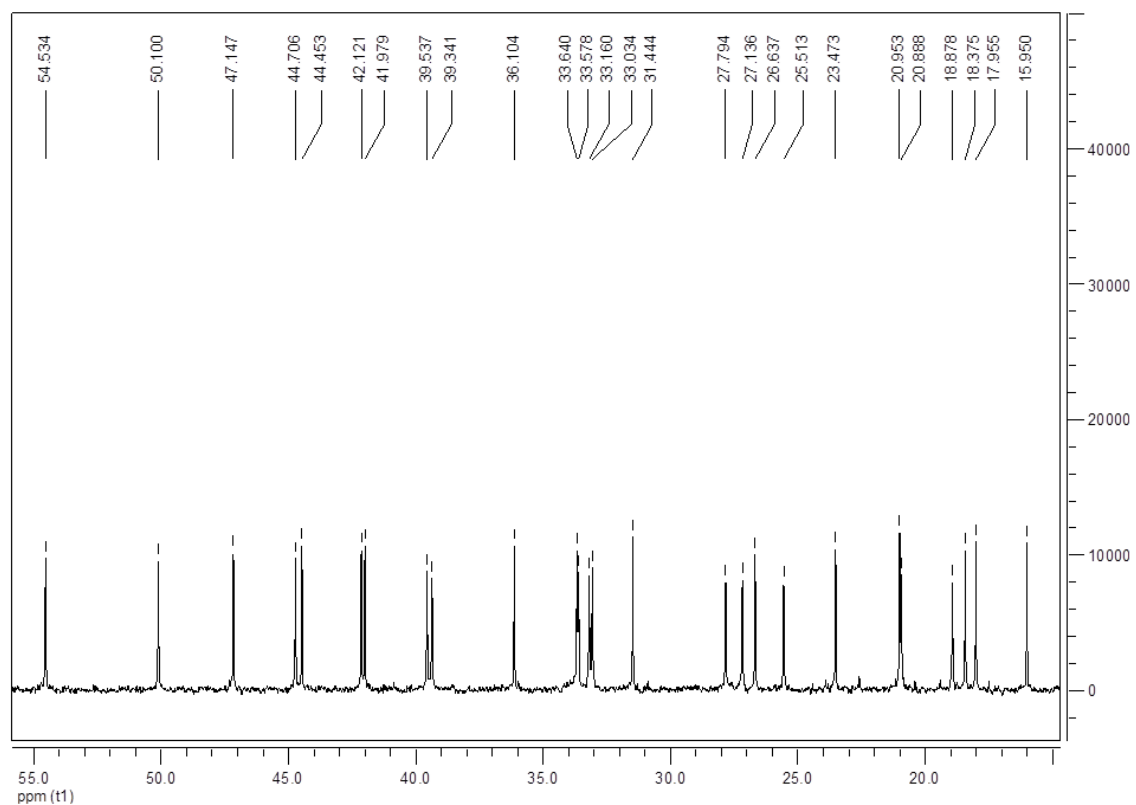

DEPT-135 NMR spectrum for compound **21** recorded in CDCl<sub>3</sub>.

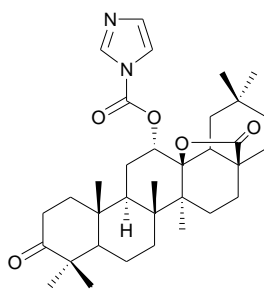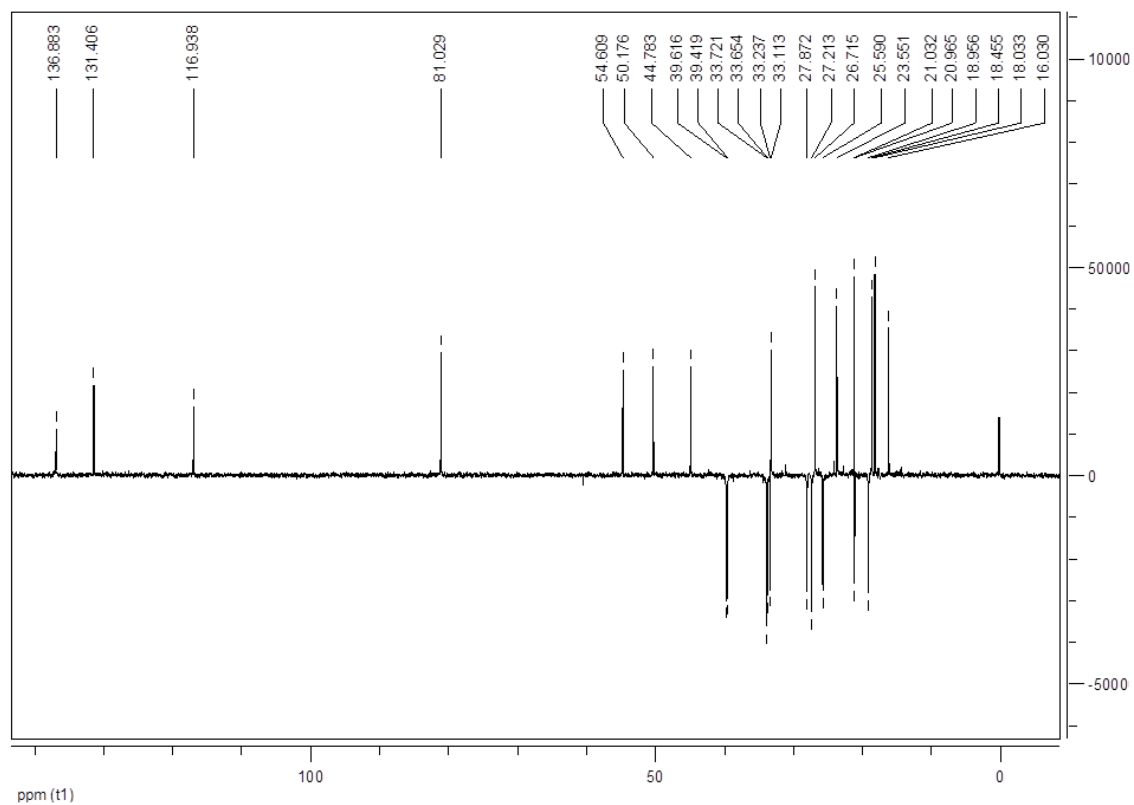

HMQC NMR spectrum for compound **21** recorded in CDCl<sub>3</sub>.

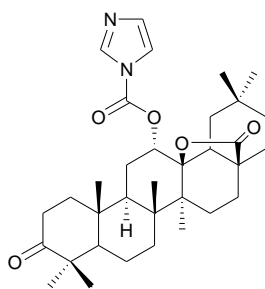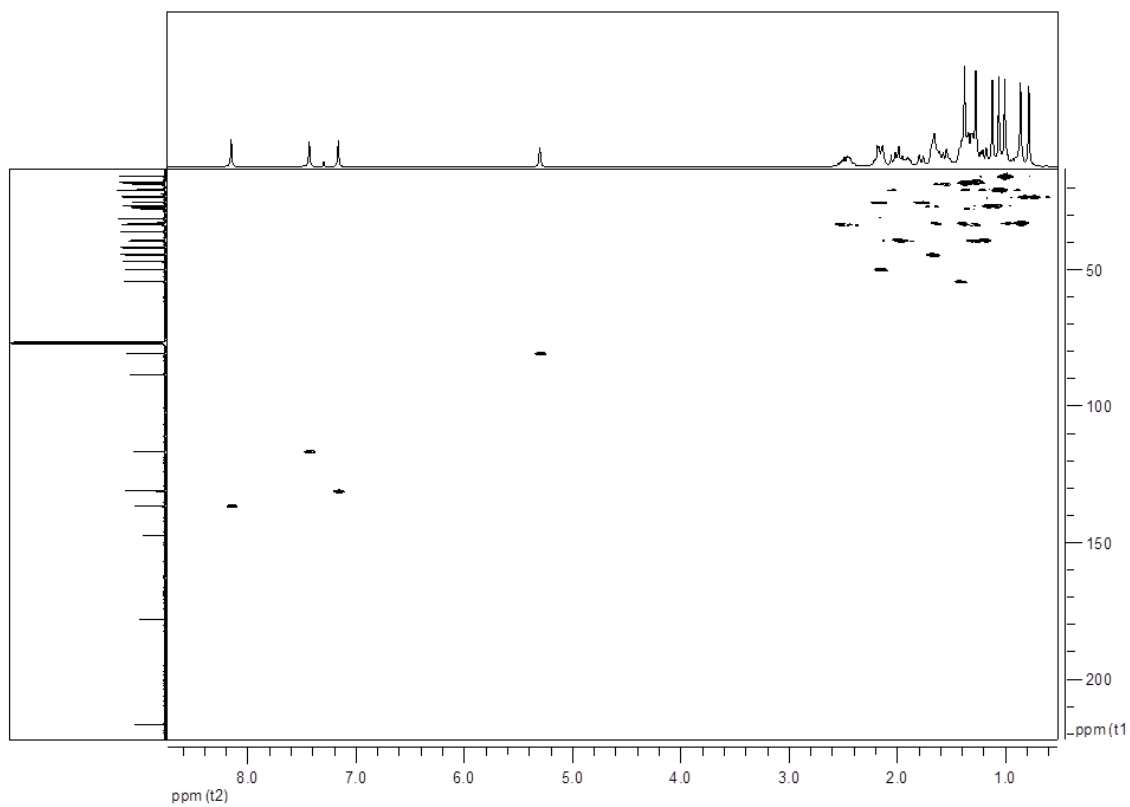

HMBC NMR spectrum for compound **21** recorded in CDCl<sub>3</sub>.

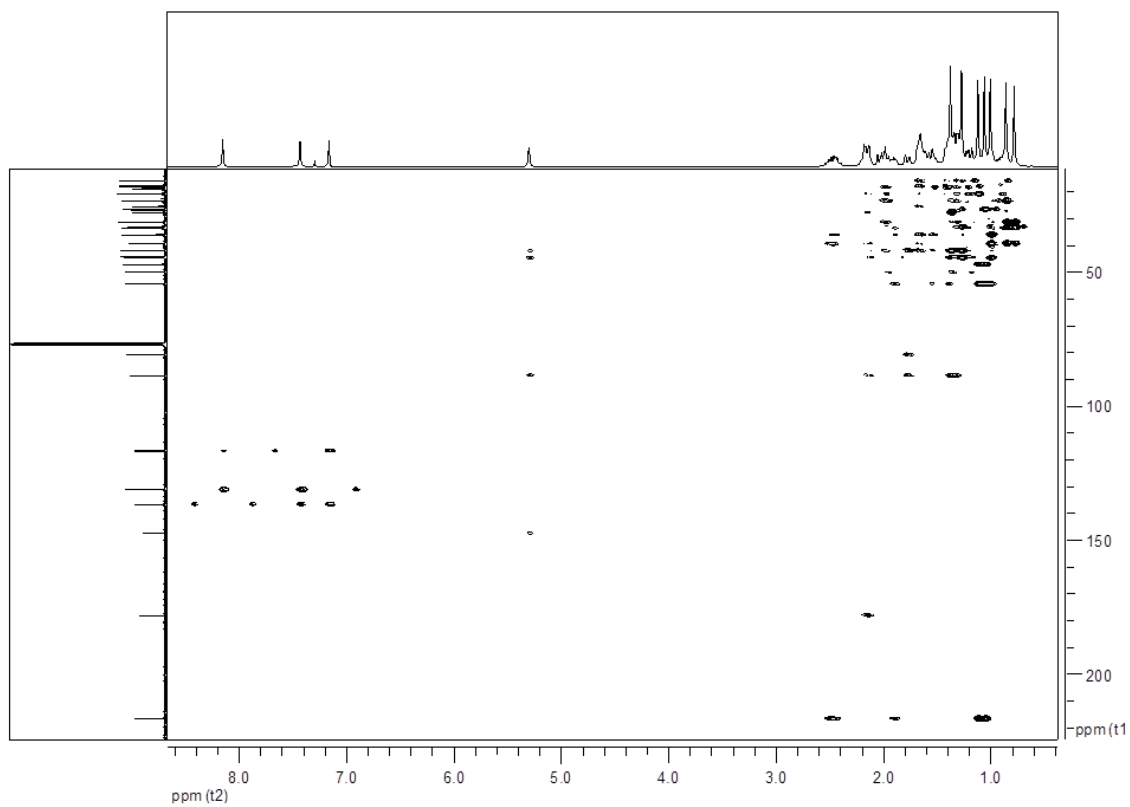

## 8. Spectral data for compound **22**

$^1\text{H}$  NMR spectrum for compound **22** recorded in  $\text{CDCl}_3$ .

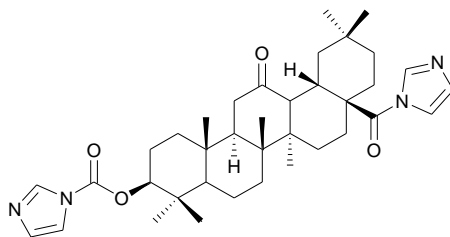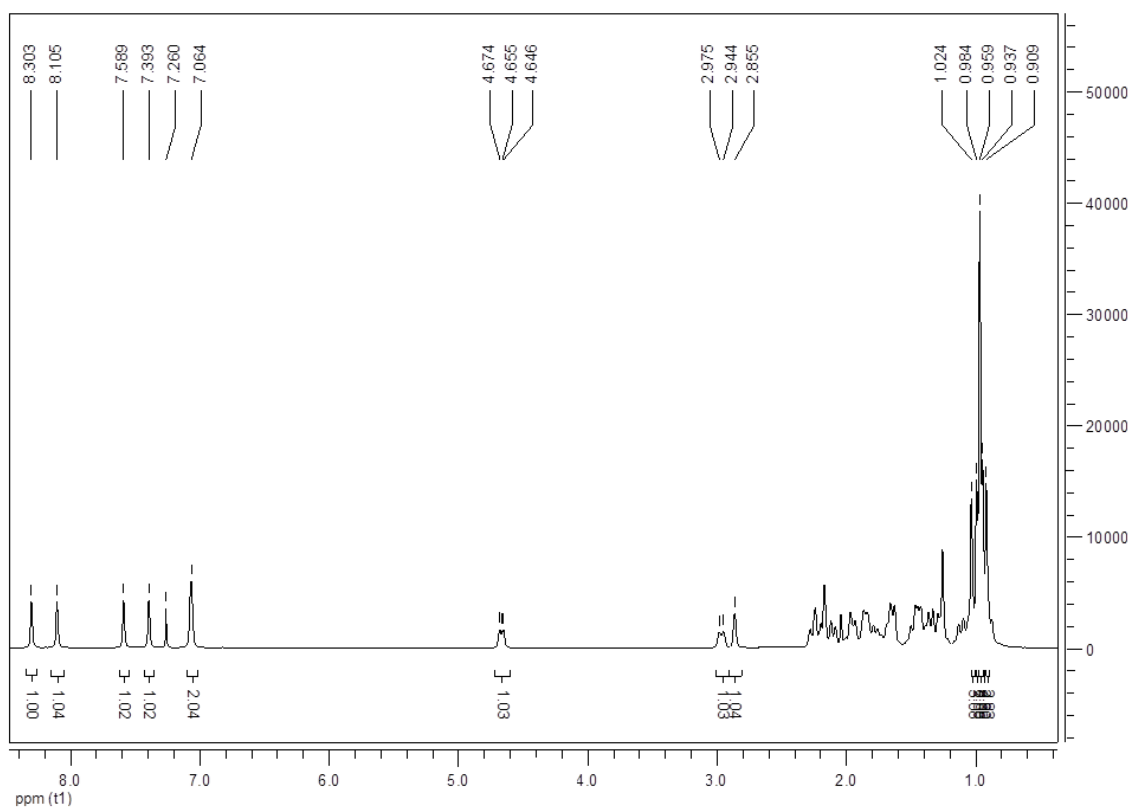



$^{13}\text{C}$  NMR spectrum for compound **22** recorded in  $\text{CDCl}_3$ .

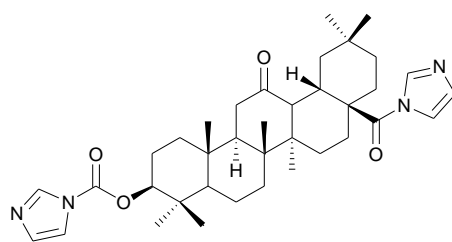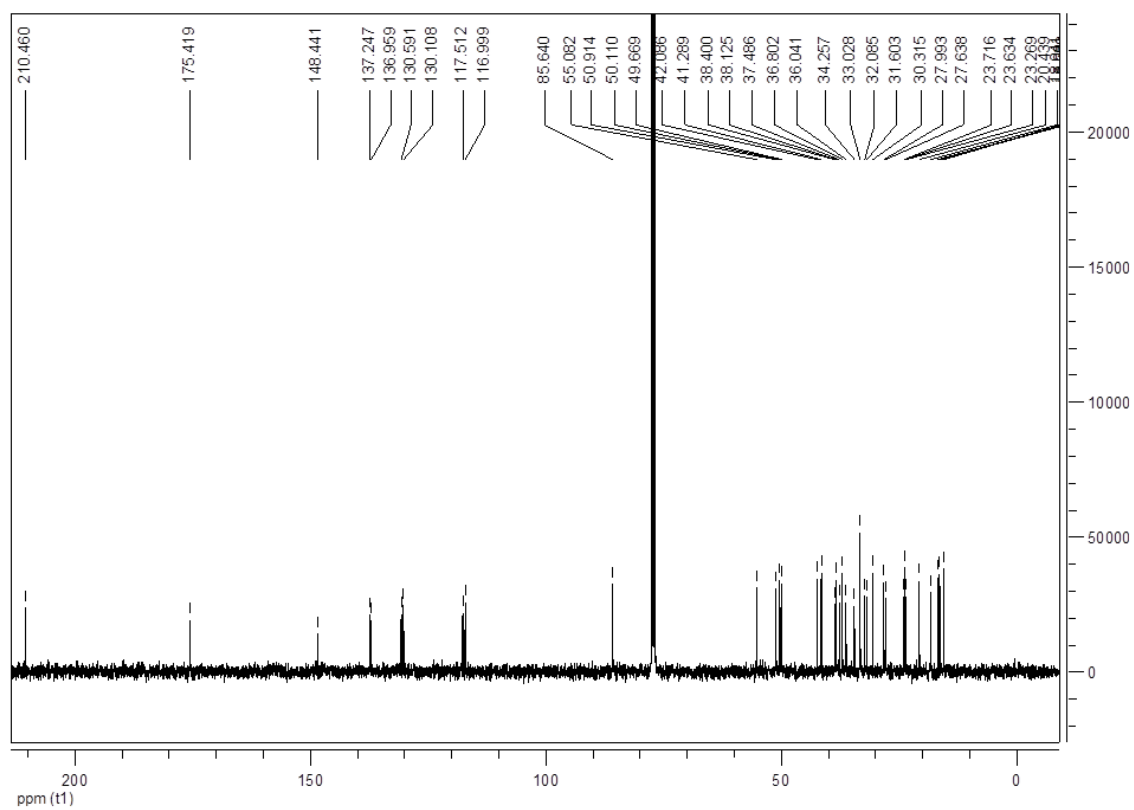

$^{13}\text{C}$  NMR spectrum detail of compound **22**.

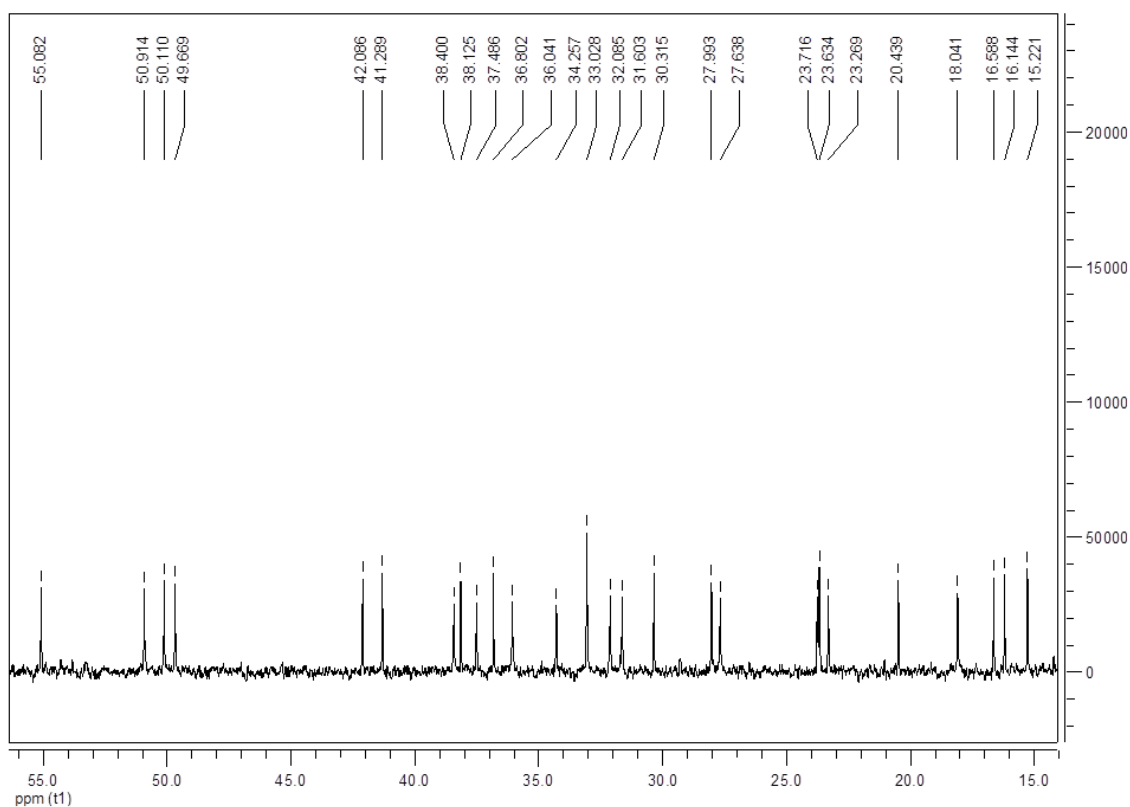

DEPT-135 NMR spectrum for compound **22** recorded in CDCl<sub>3</sub>.

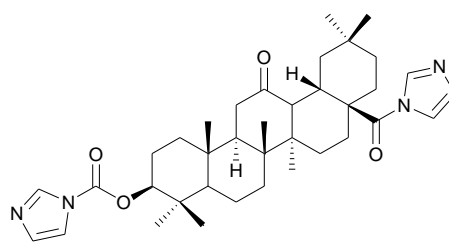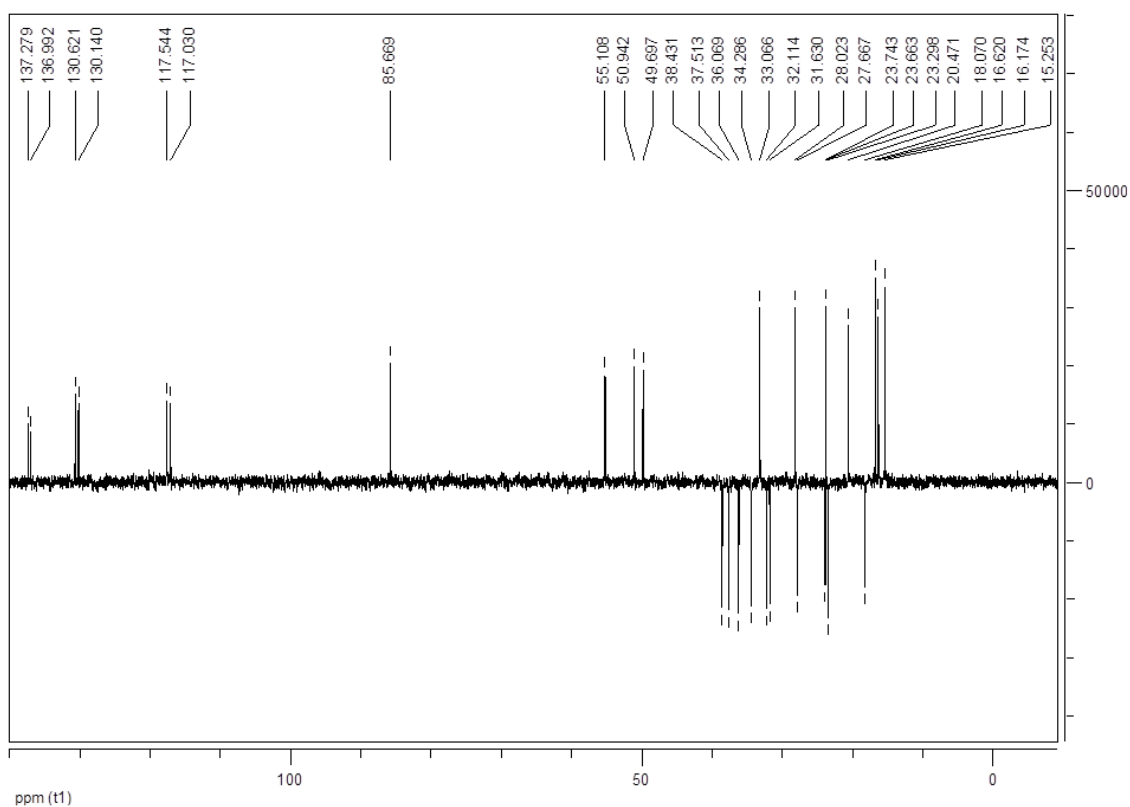

## 9. Spectral data for compound **23**

$^1\text{H}$  NMR spectrum for compound **23** recorded in  $\text{CDCl}_3$ .

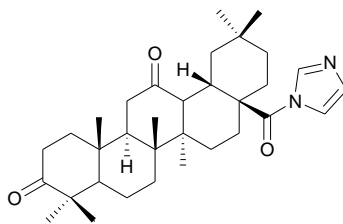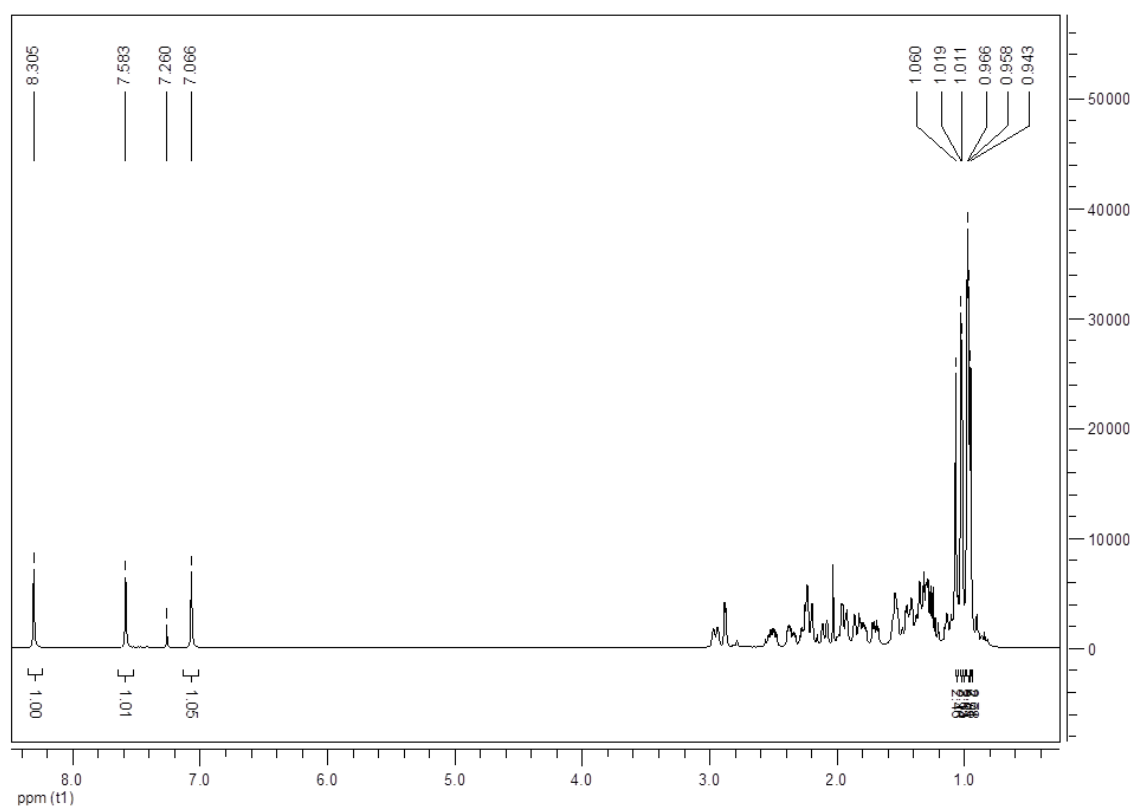

$^{13}\text{C}$  NMR spectrum for compound **23** recorded in  $\text{CDCl}_3$ .

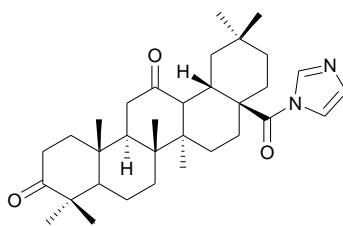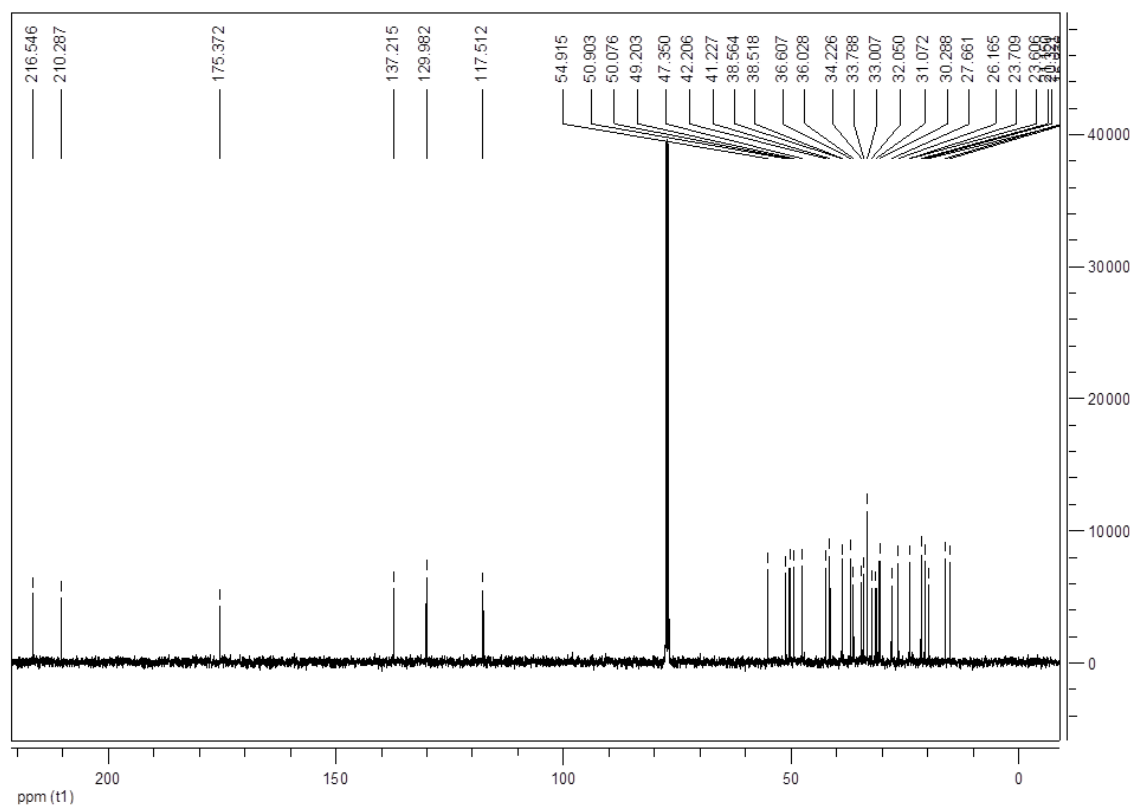

$^{13}\text{C}$  NMR spectrum detail of compound **23**.

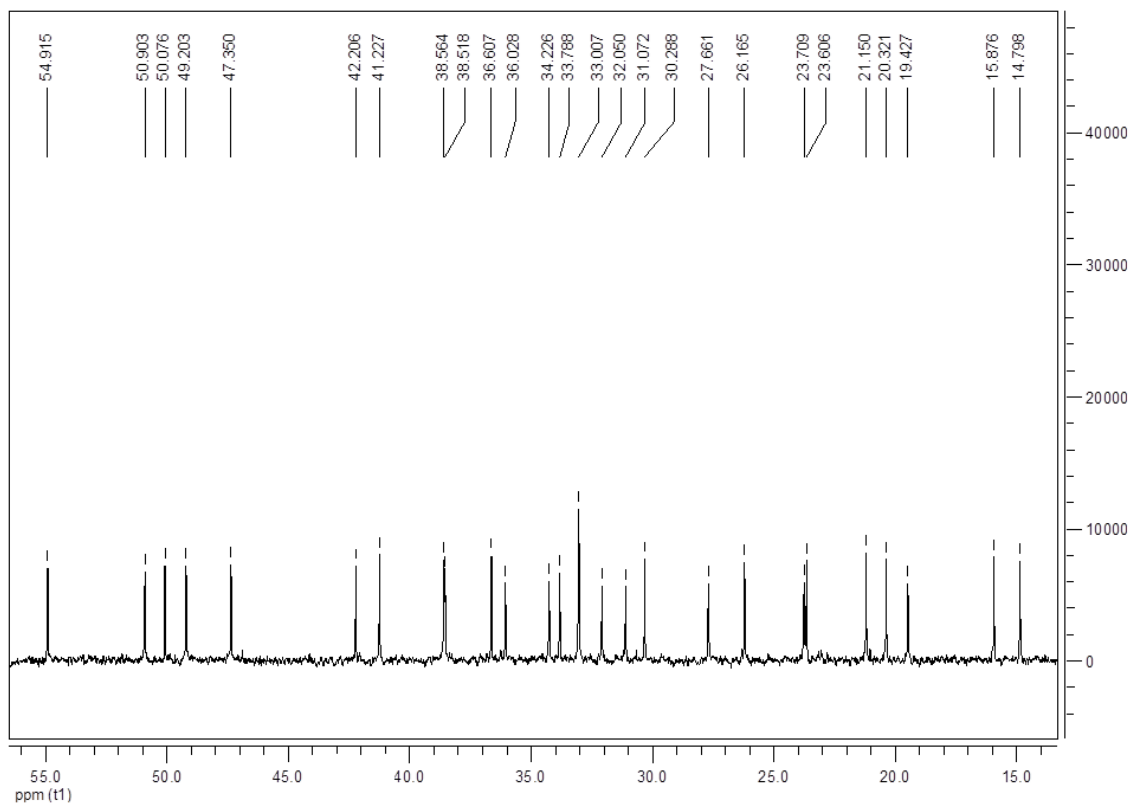

DEPT-135 NMR spectrum for compound **23** recorded in CDCl<sub>3</sub>.

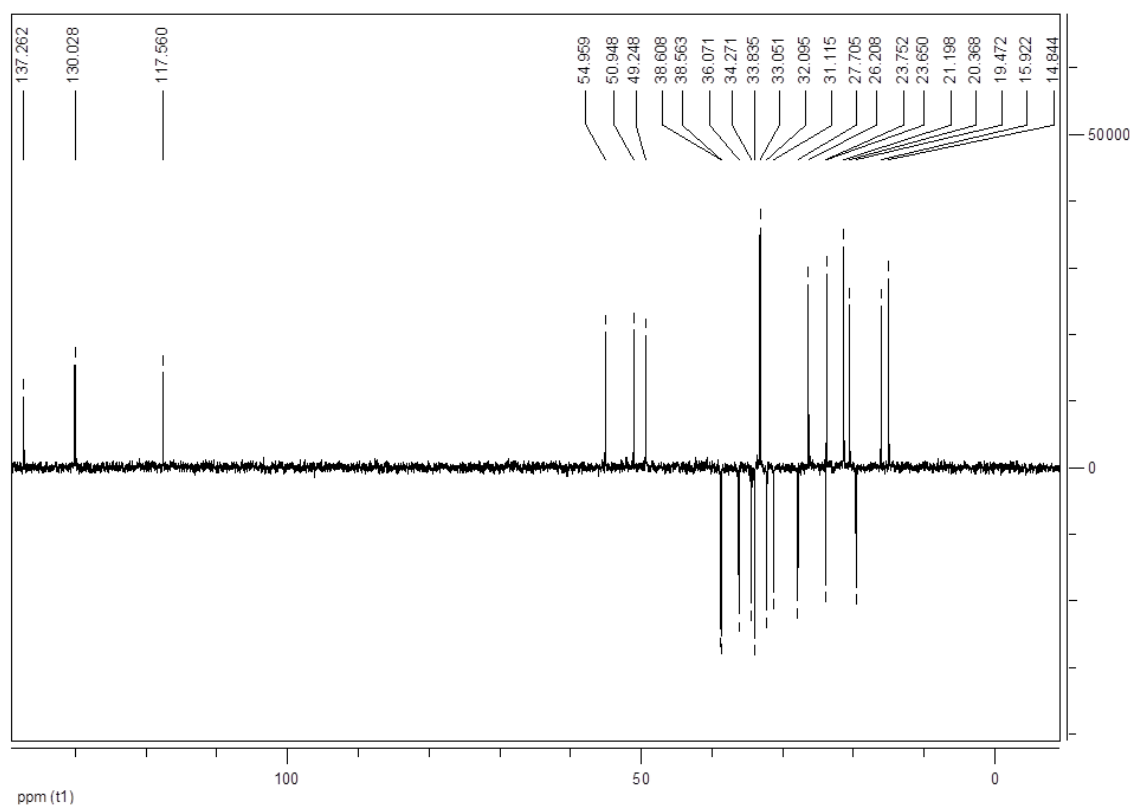

## 10. Spectral data for compound **24**

$^1\text{H}$  NMR spectrum for compound **24** recorded in  $\text{CDCl}_3$ .

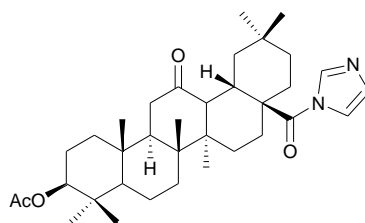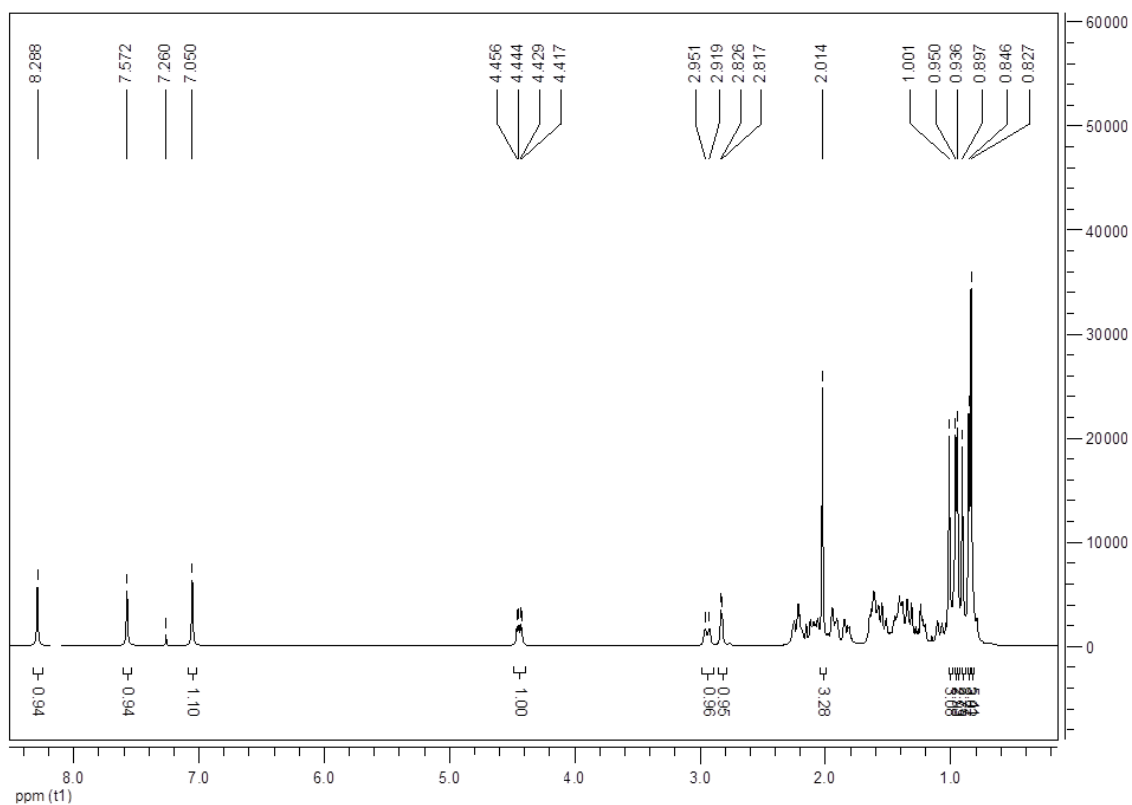



$^{13}\text{C}$  NMR spectrum for compound **24** recorded in  $\text{CDCl}_3$ .

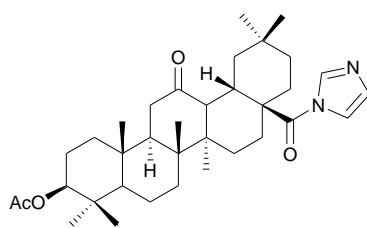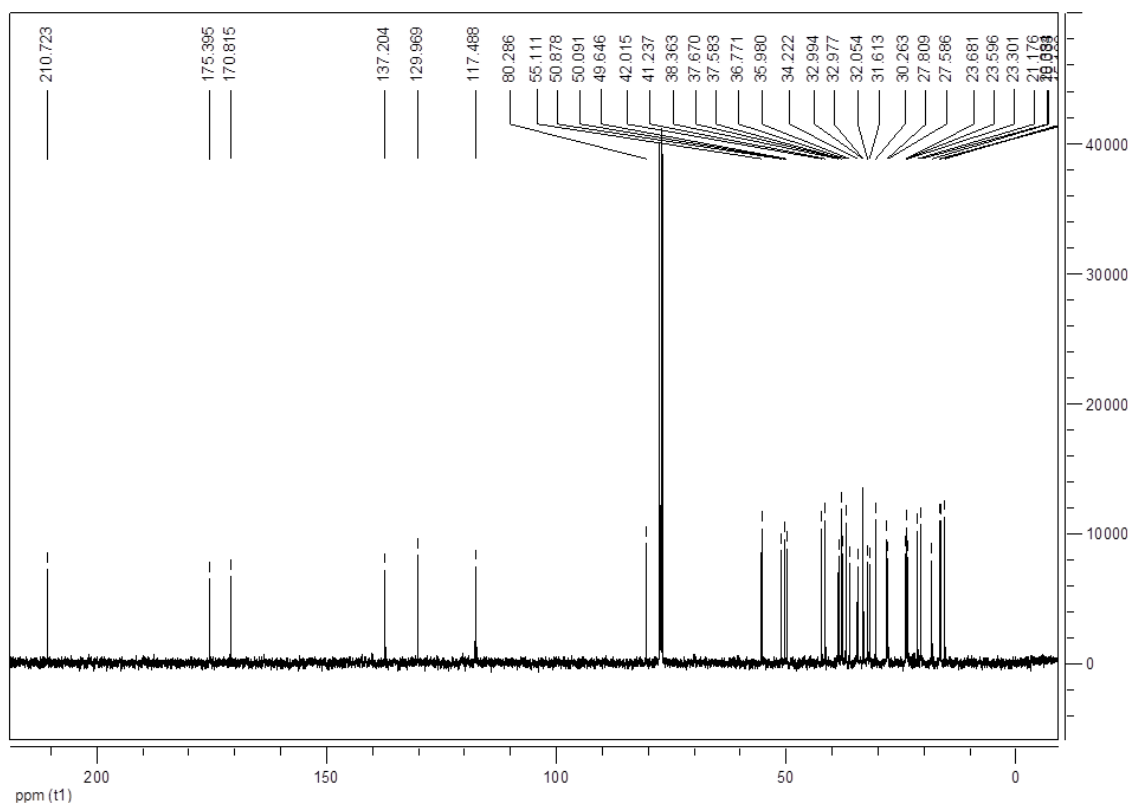

$^{13}\text{C}$  NMR spectrum detail of compound **24**.

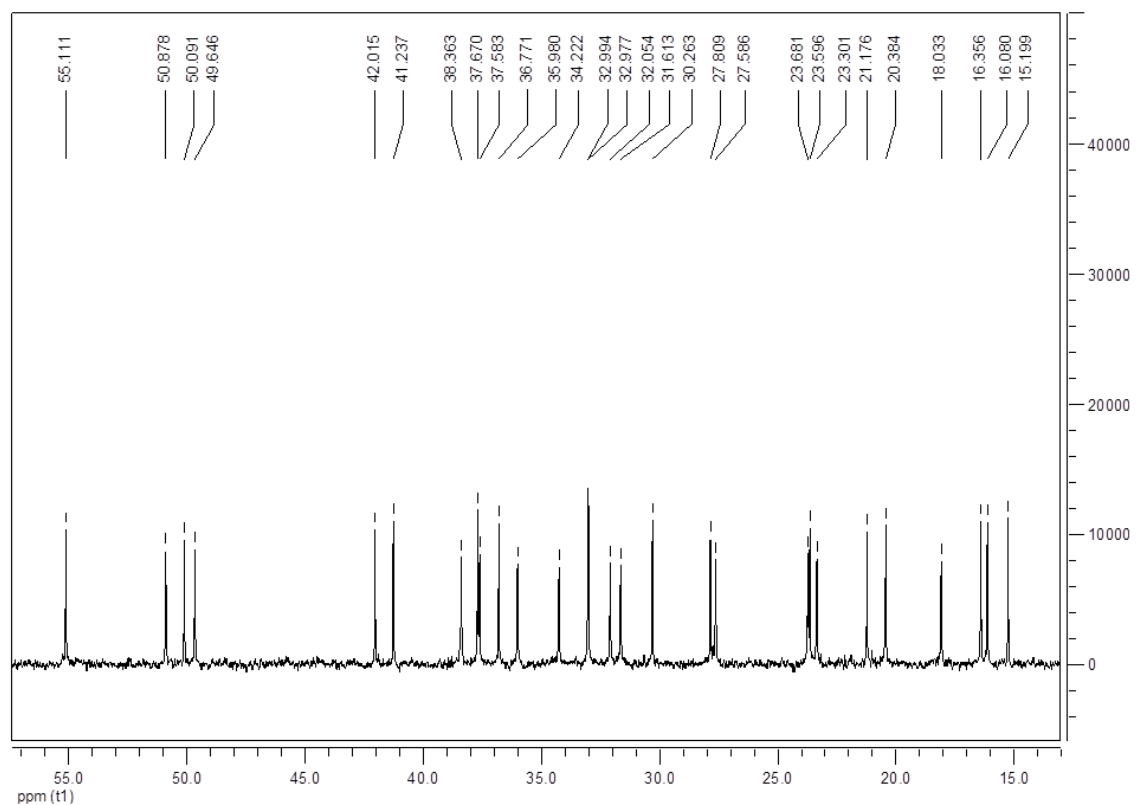

DEPT-135 NMR spectrum for compound **24** recorded in CDCl<sub>3</sub>.

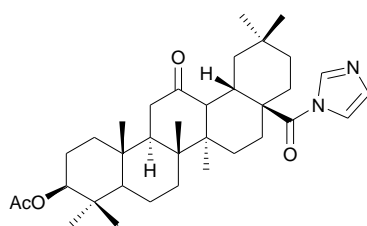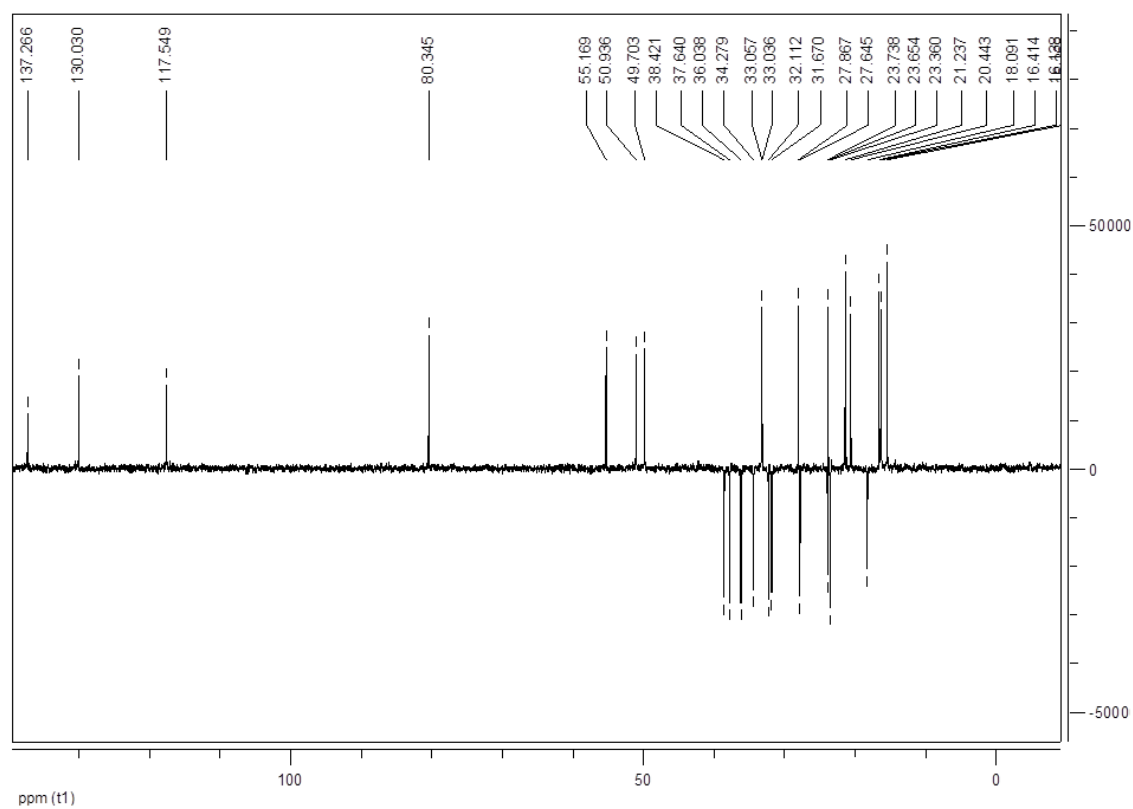

## 11. Spectral data for compound **25**

<sup>1</sup>H NMR spectrum for compound **25** recorded in CDCl<sub>3</sub>.

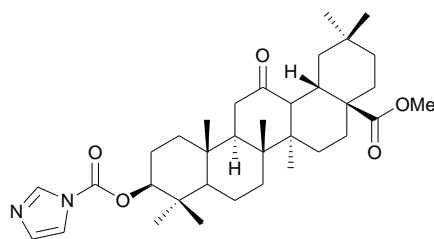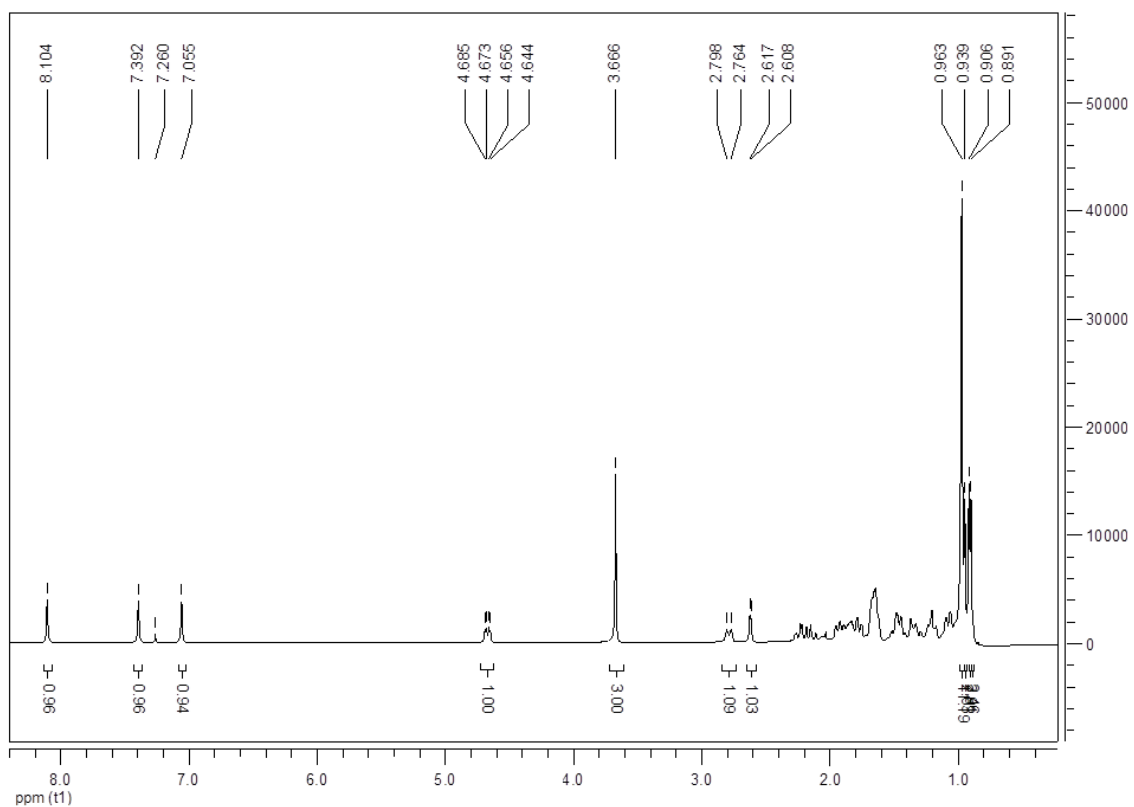

$^{13}\text{C}$  NMR spectrum for compound **25** recorded in  $\text{CDCl}_3$ .

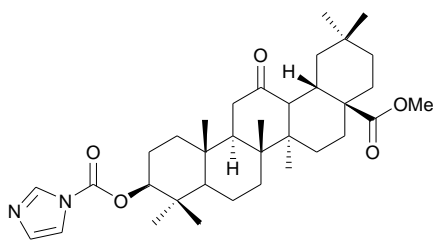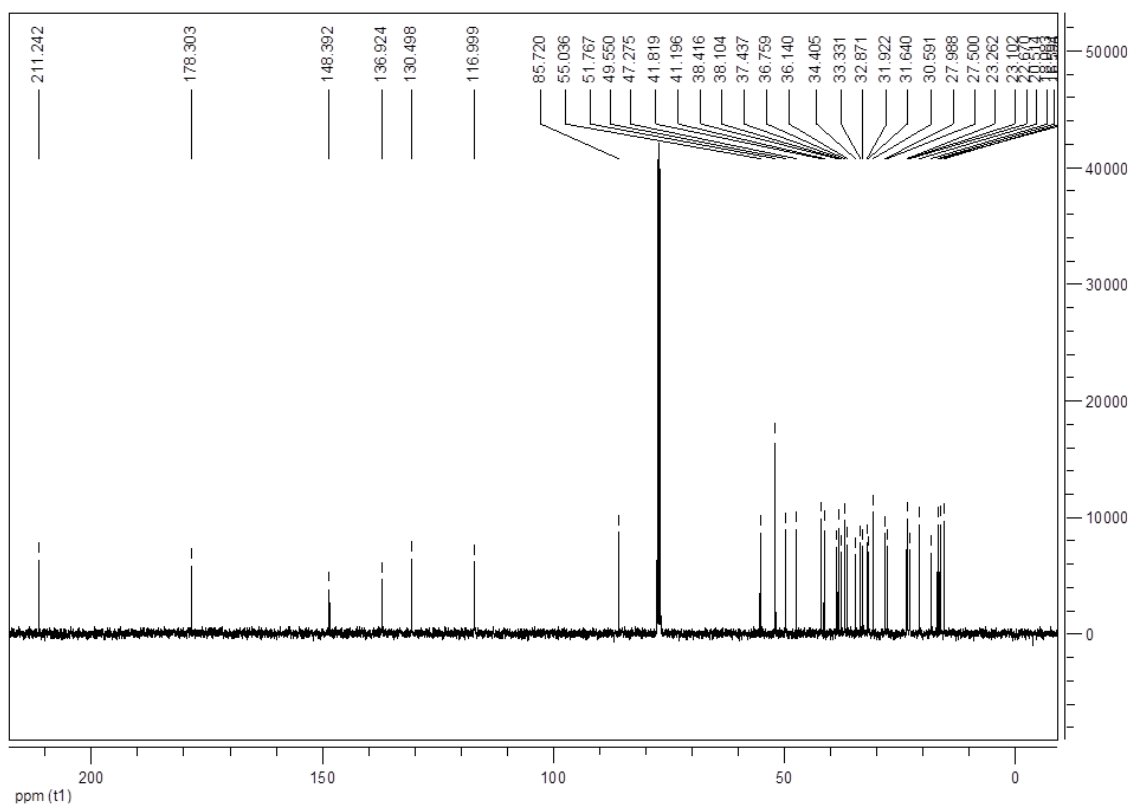

$^{13}\text{C}$  NMR spectrum detail of compound **25**.

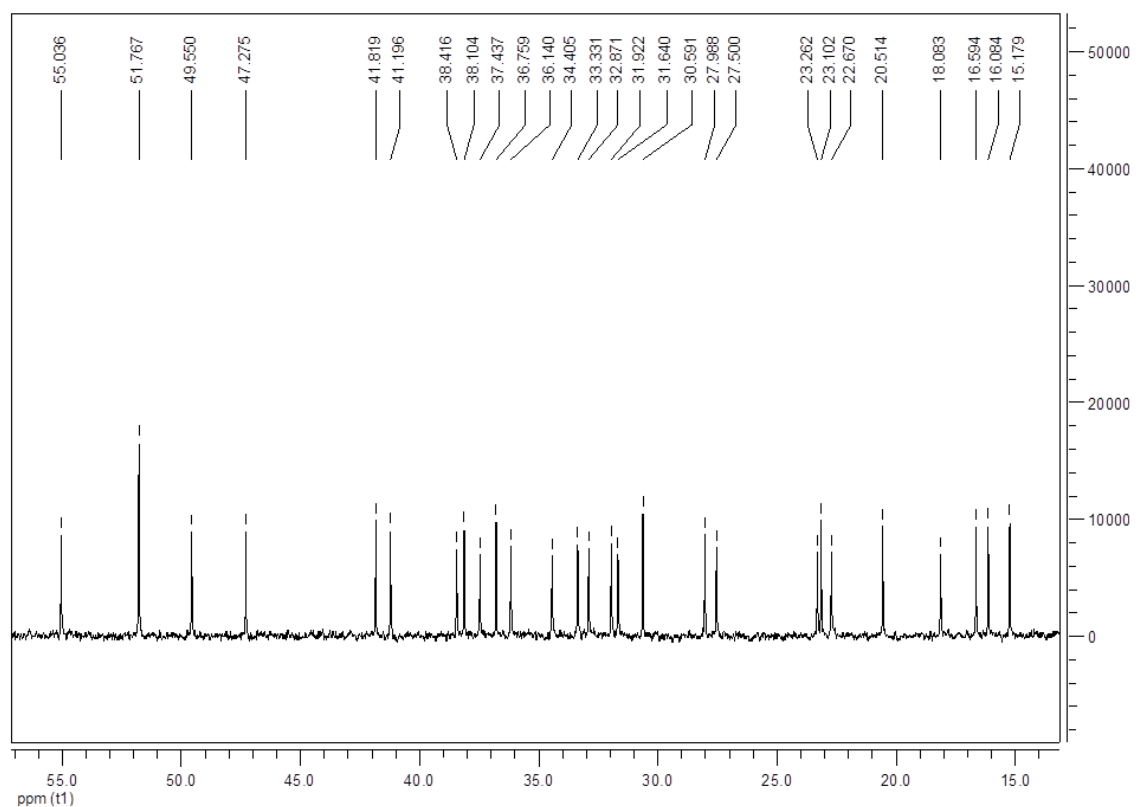

DEPT-135 NMR spectrum for compound **25** recorded in CDCl<sub>3</sub>.

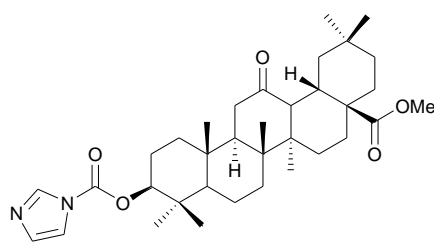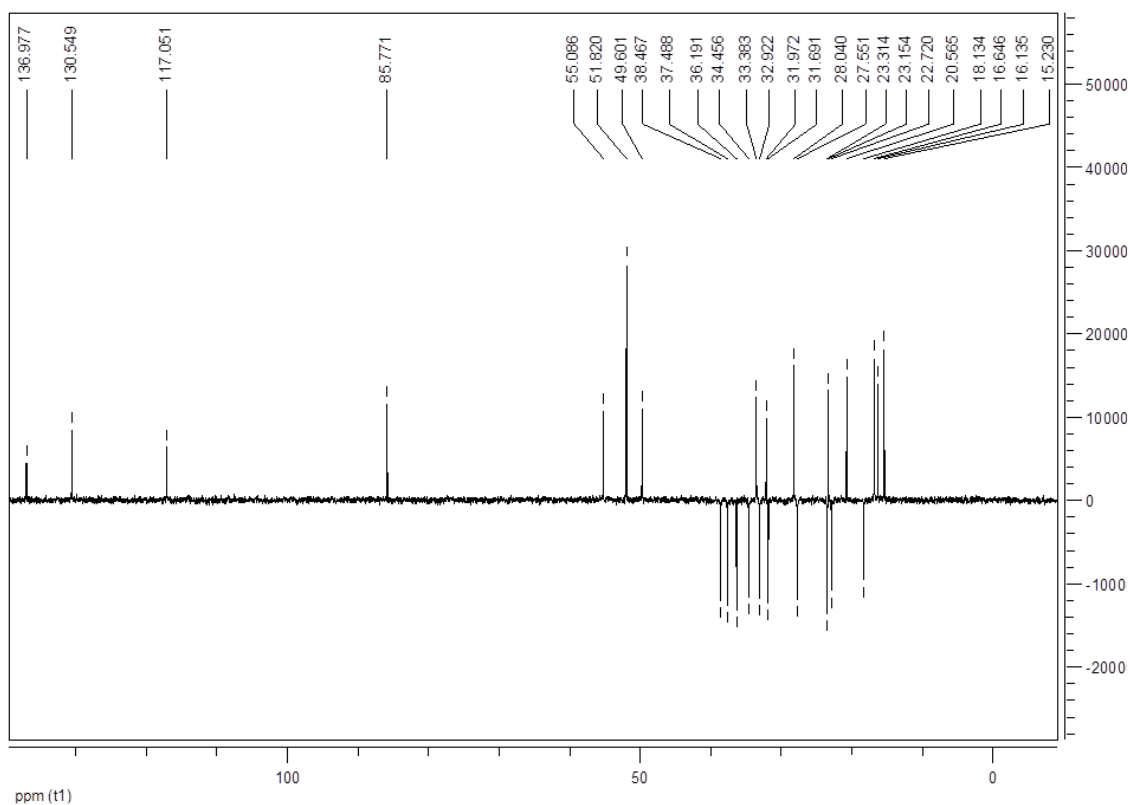

## 11. Spectral data for compound 26

$^1\text{H}$  NMR spectrum for compound 26 recorded in  $\text{CDCl}_3$ .

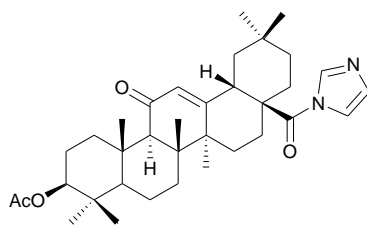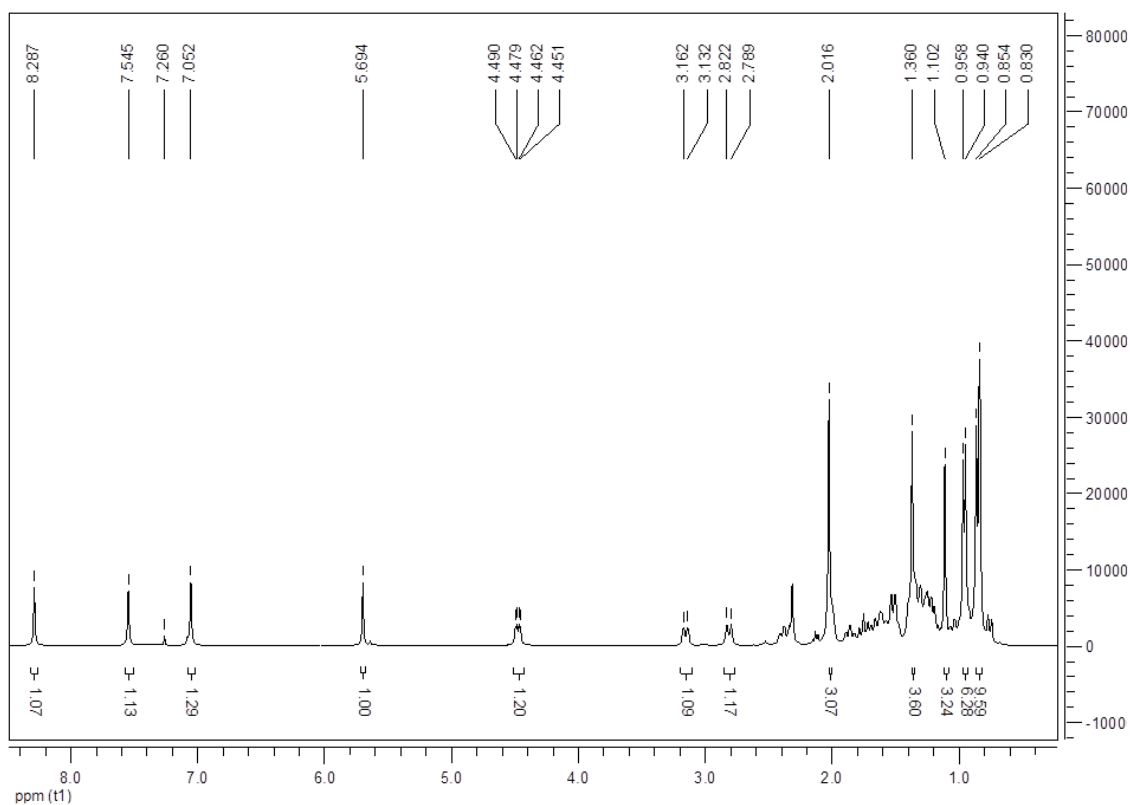



$^{13}\text{C}$  NMR spectrum for compound **26** recorded in  $\text{CDCl}_3$ .

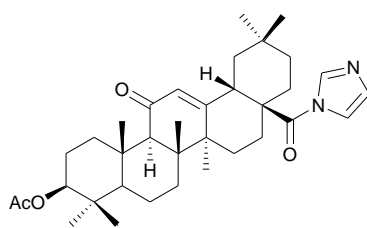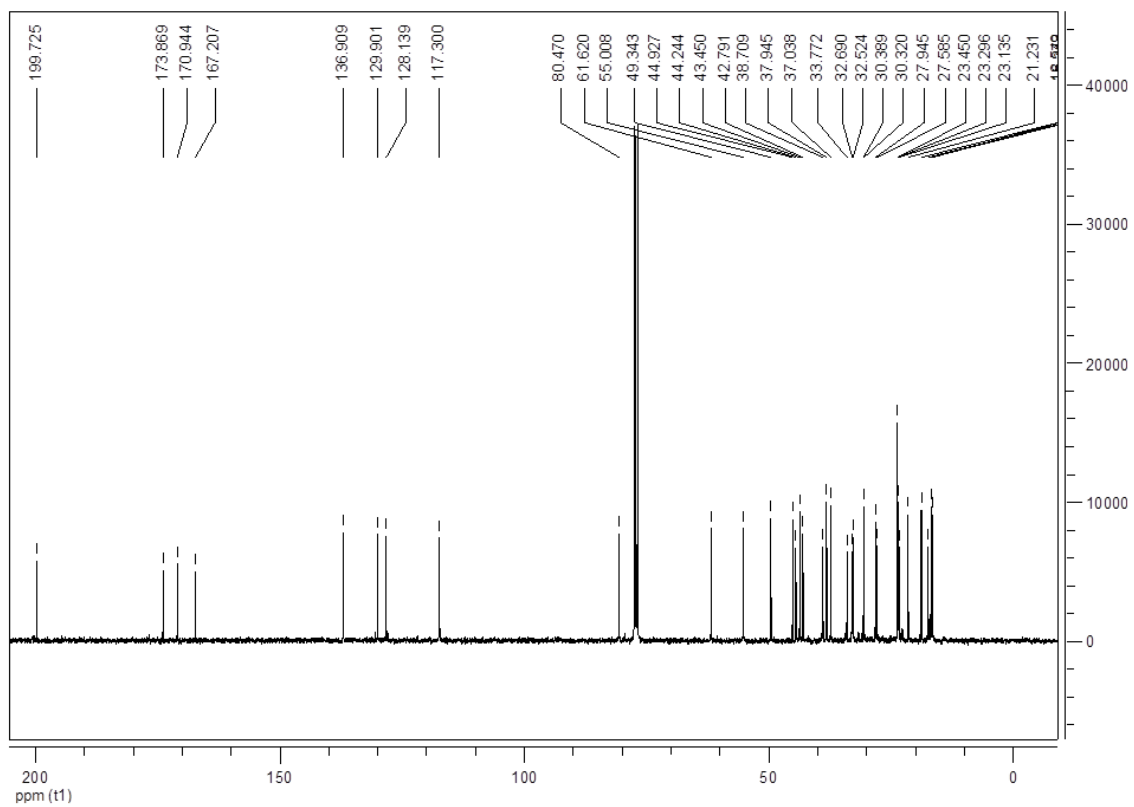

$^{13}\text{C}$  NMR spectrum detail of compound **26**.

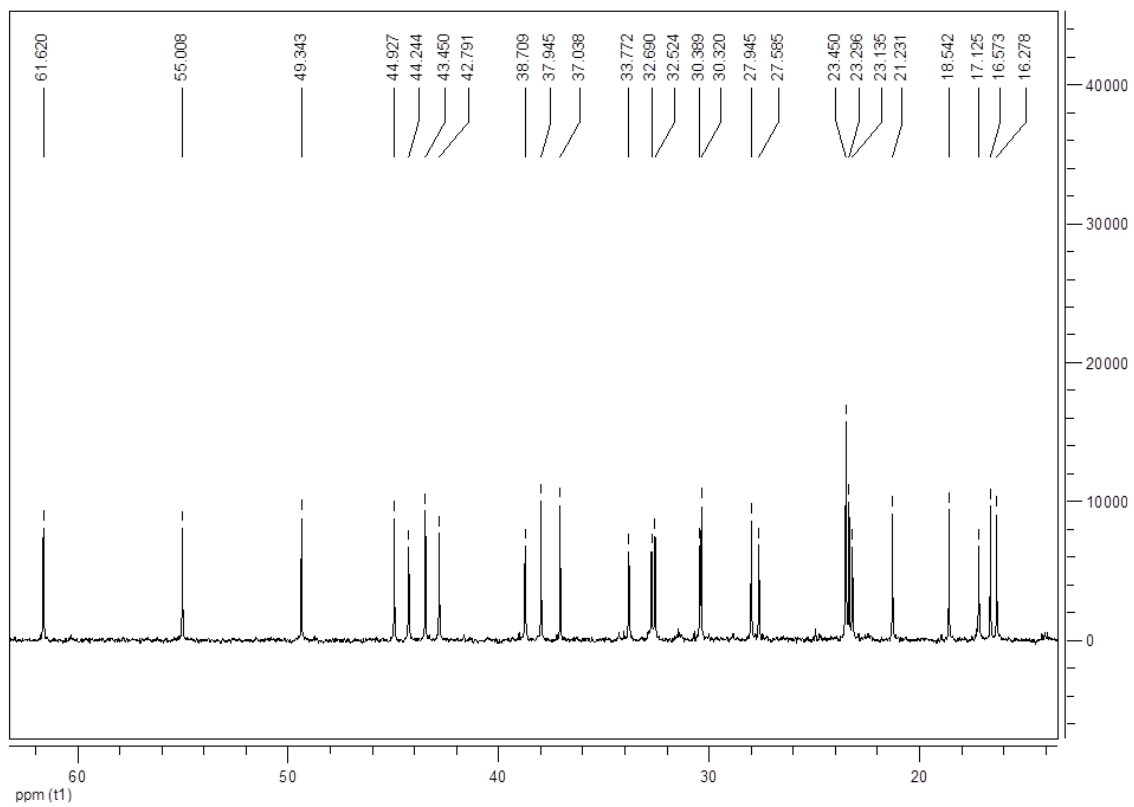

DEPT-135 NMR spectrum for compound **26** recorded in CDCl<sub>3</sub>.

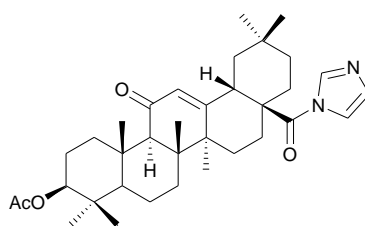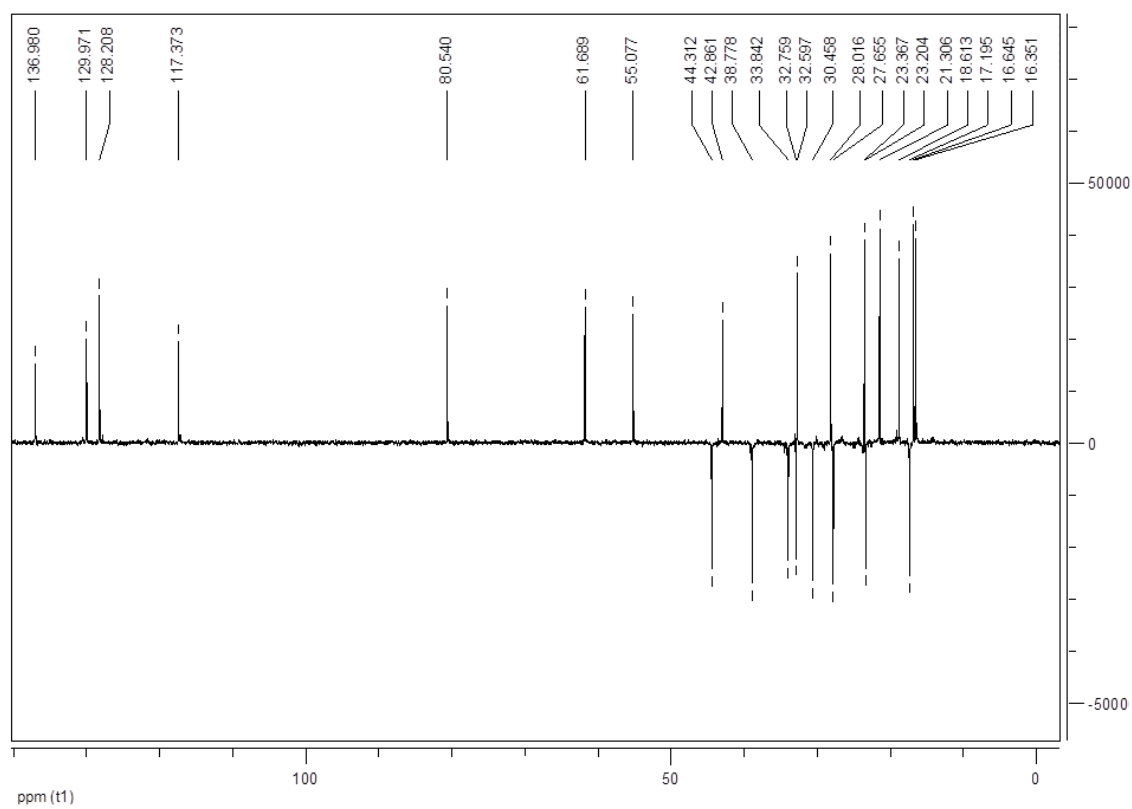

HMQC NMR spectrum for compound **26** recorded in CDCl<sub>3</sub>.

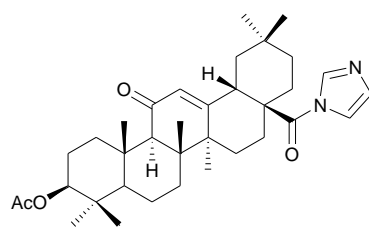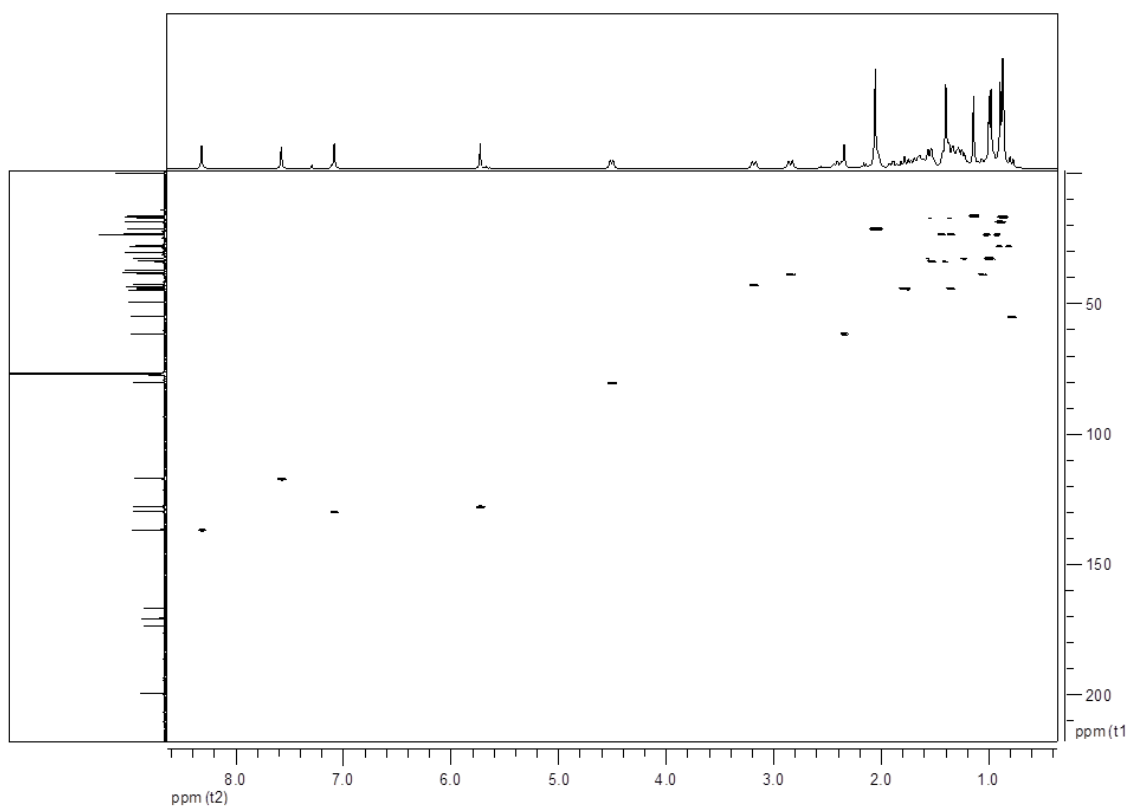

HMBC NMR spectrum for compound **26** recorded in CDCl<sub>3</sub>.

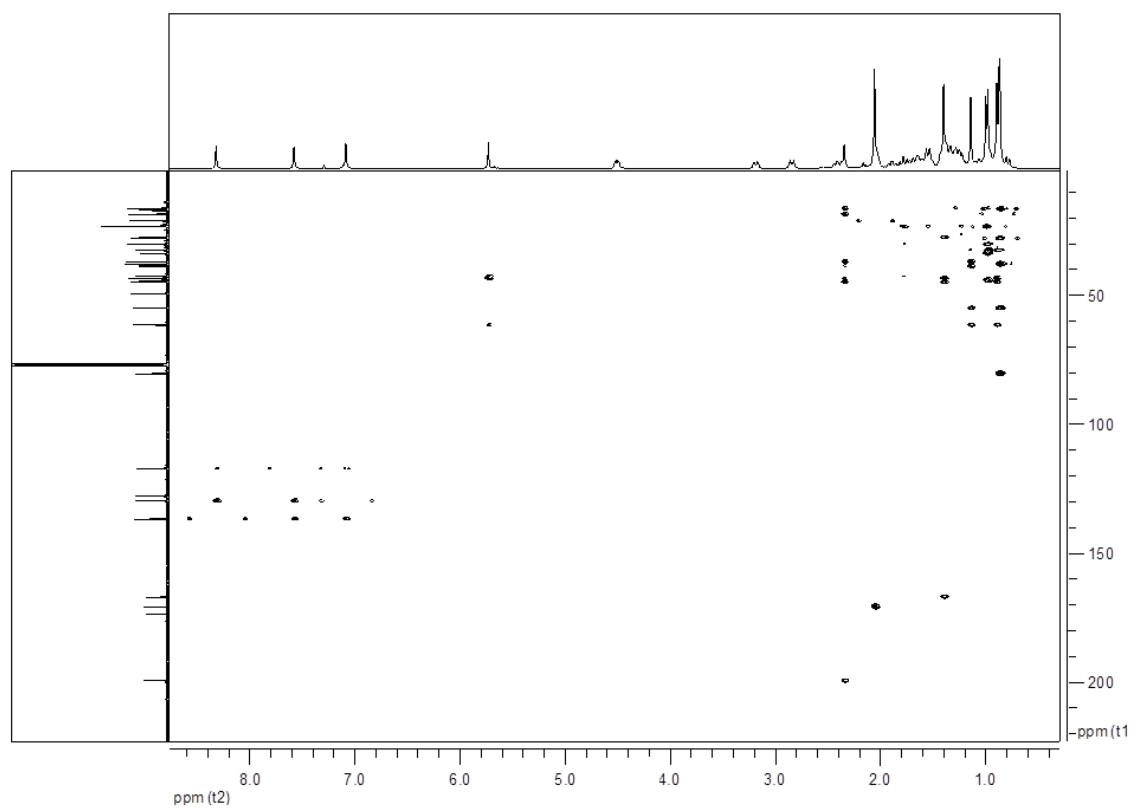

### 13. Spectral data for compound **27**

<sup>1</sup>H NMR spectrum for compound **27** recorded in CDCl<sub>3</sub>.

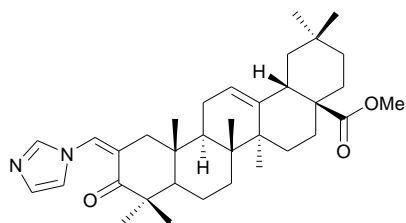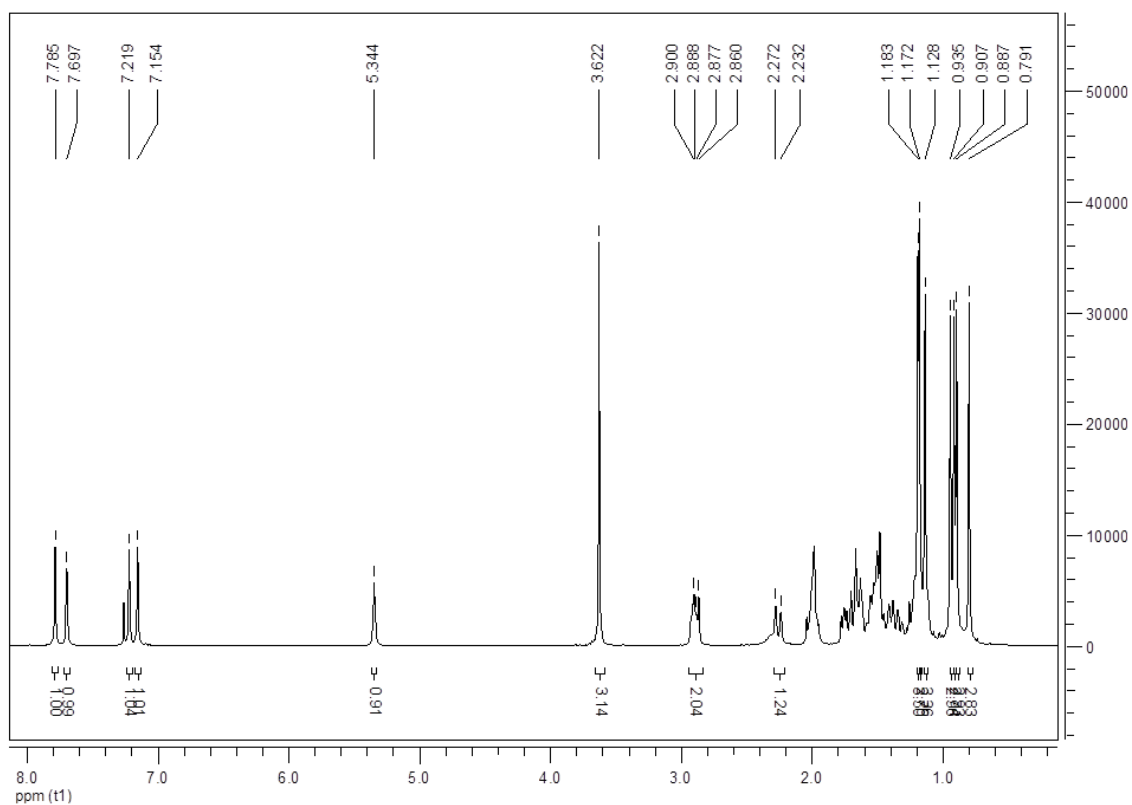

$^{13}\text{C}$  NMR spectrum for compound **27** recorded in  $\text{CDCl}_3$ .

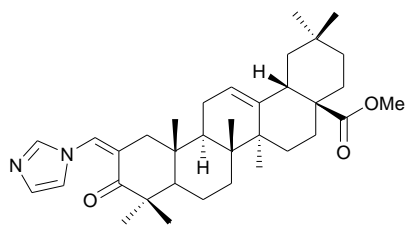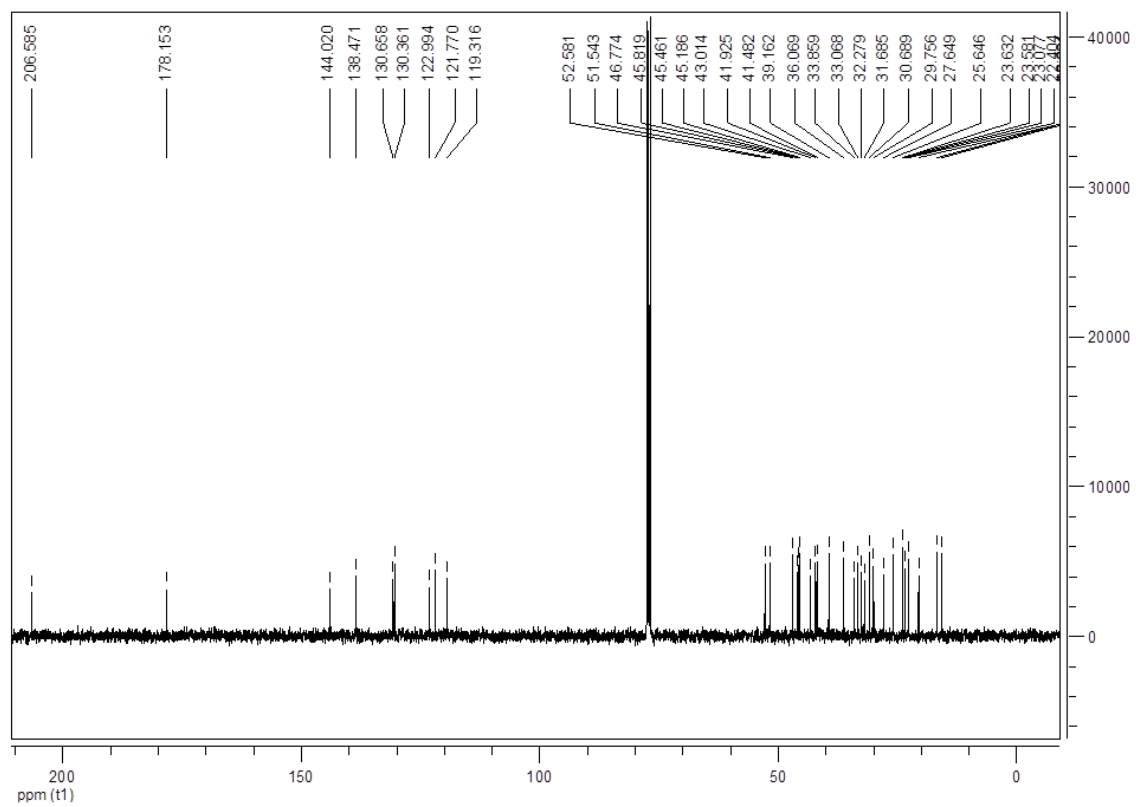

$^{13}\text{C}$  NMR spectrum detail of compound **27**.

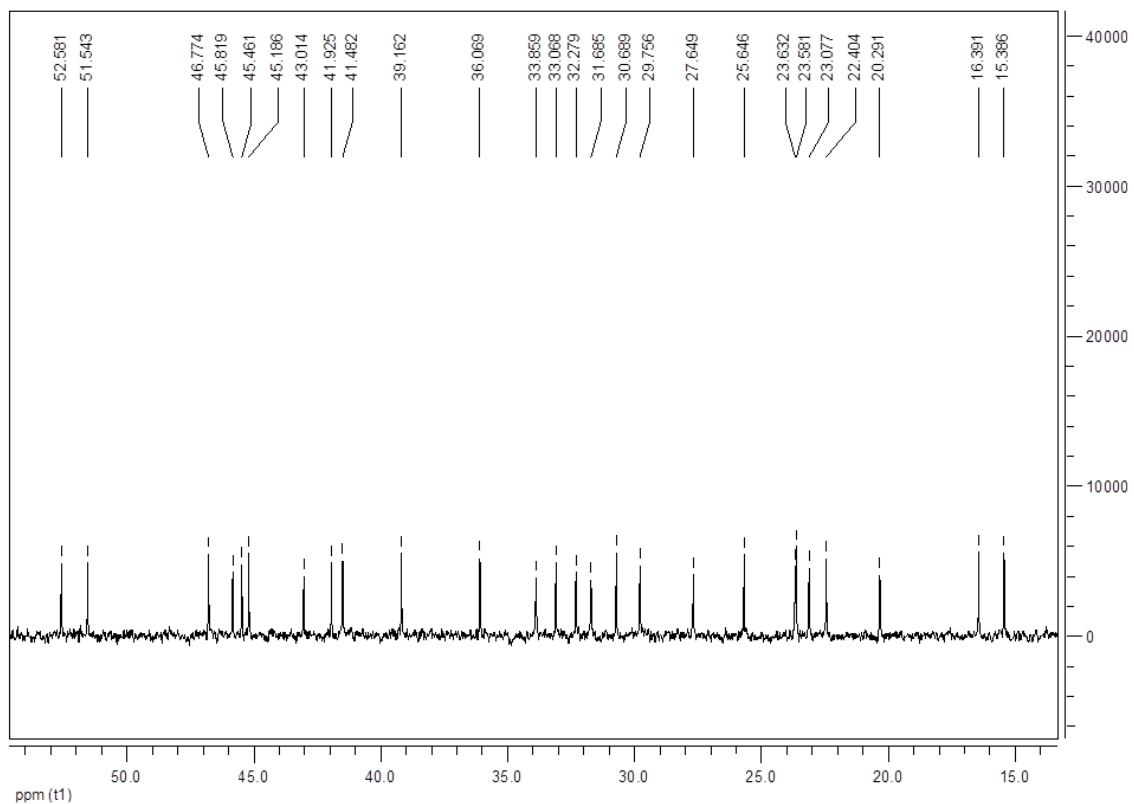



DEPT-135 NMR spectrum for compound **27** recorded in CDCl<sub>3</sub>.

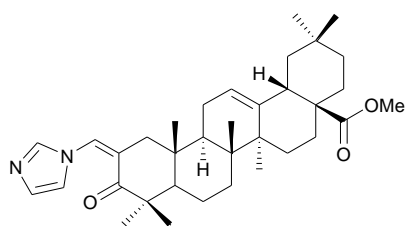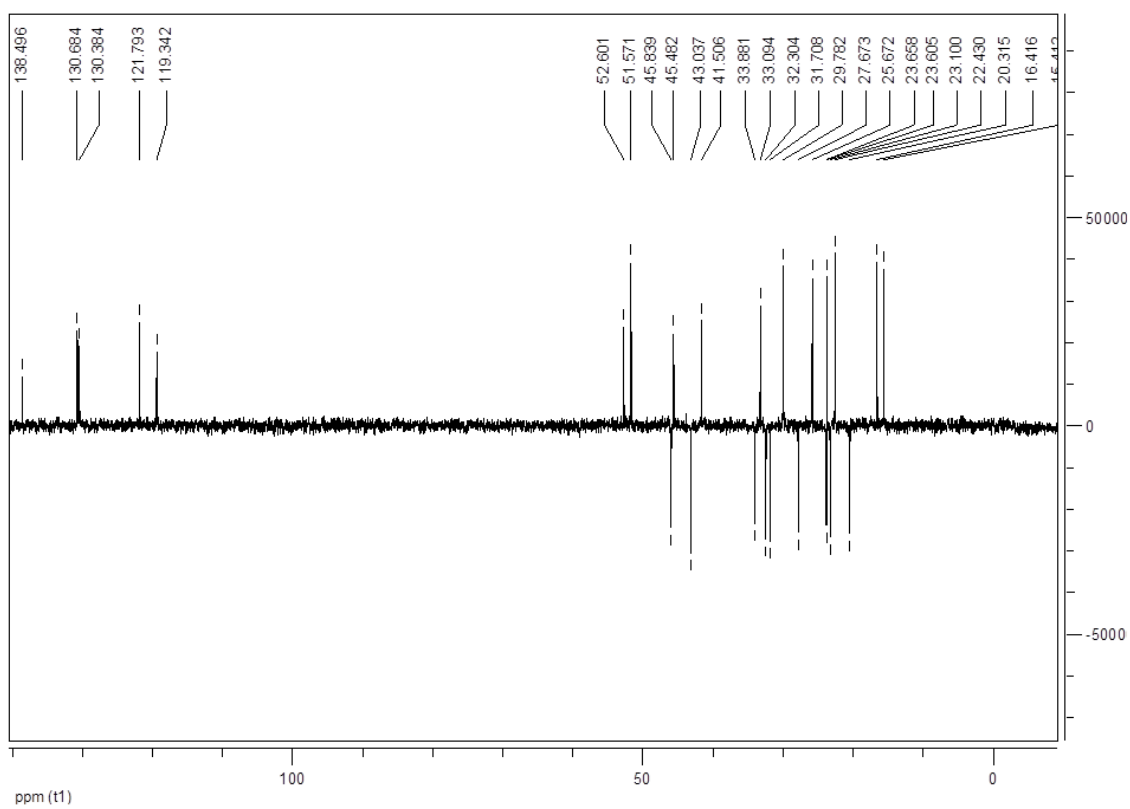

HMQC NMR spectrum for compound **27** recorded in CDCl<sub>3</sub>.

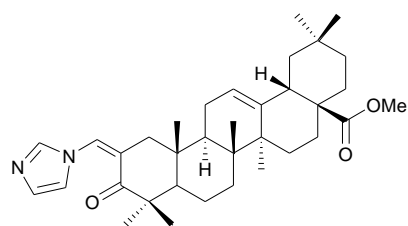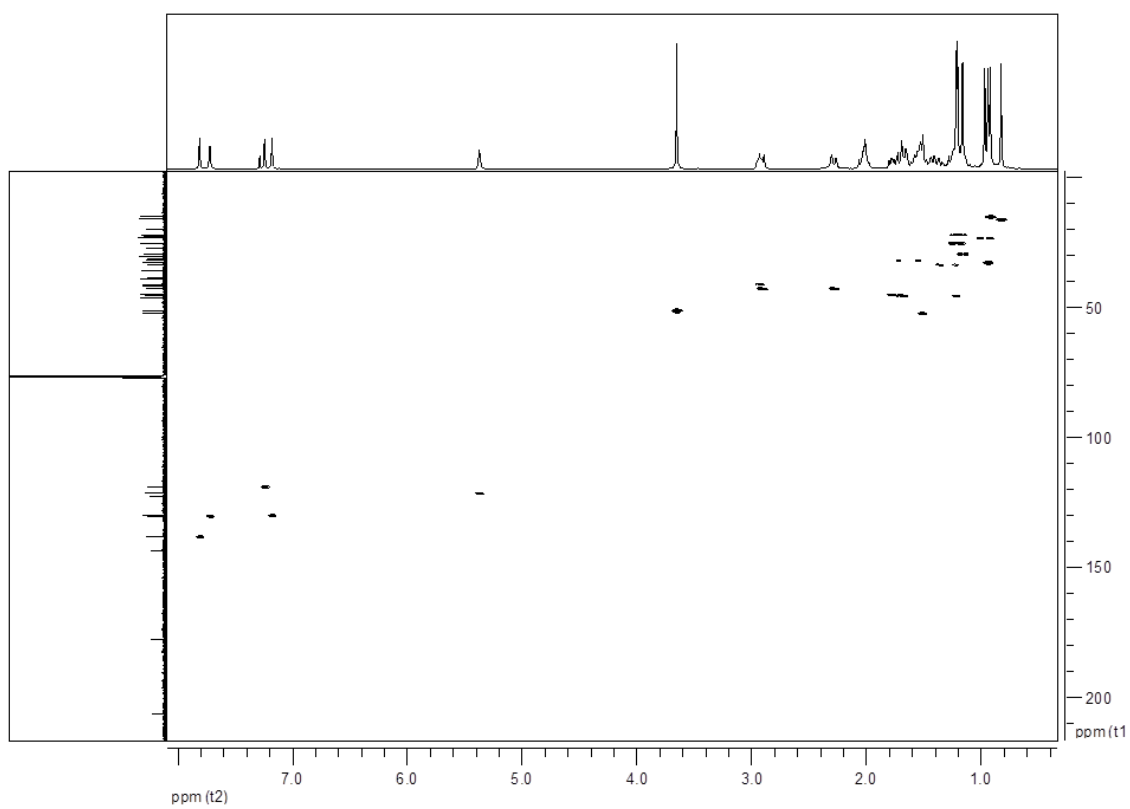

HMBC NMR spectrum for compound **27** recorded in CDCl<sub>3</sub>.

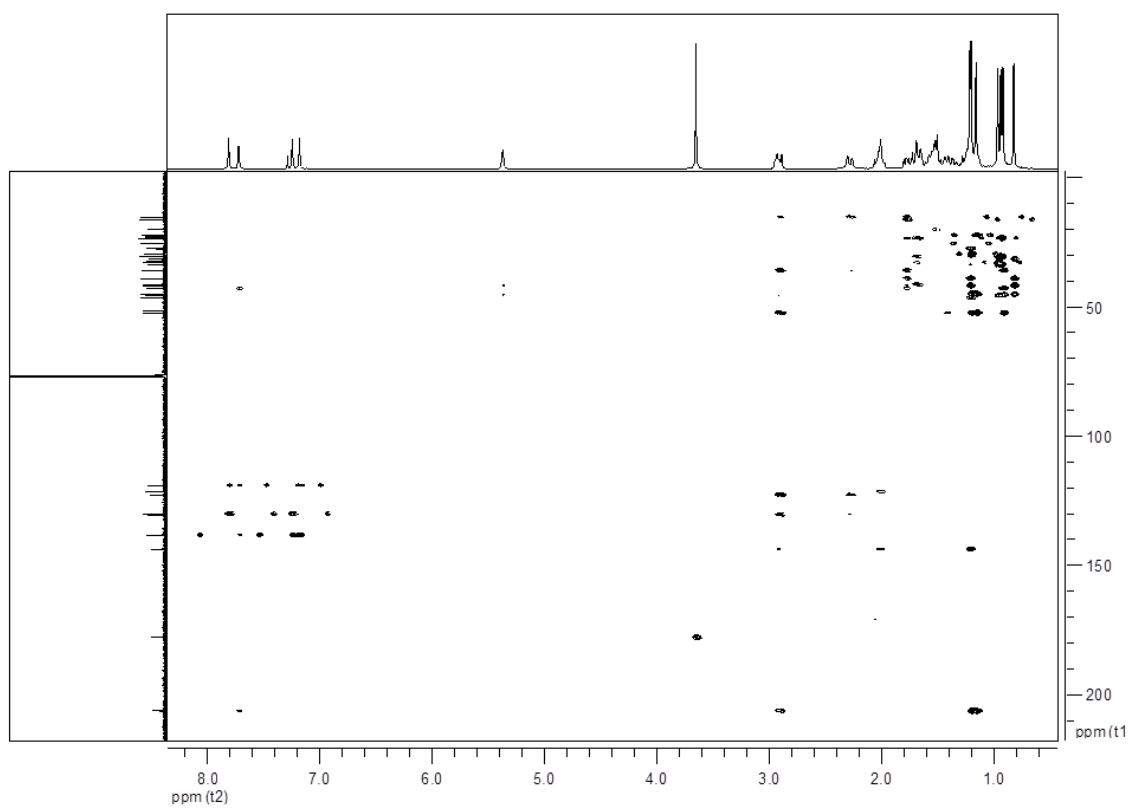

## 14. Spectral data for compound **28**

$^1\text{H}$  NMR spectrum for compound **28** recorded in  $\text{CDCl}_3$ .

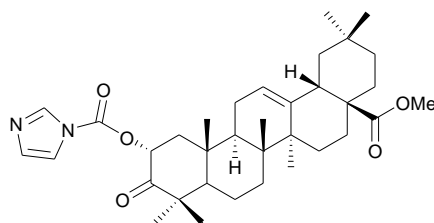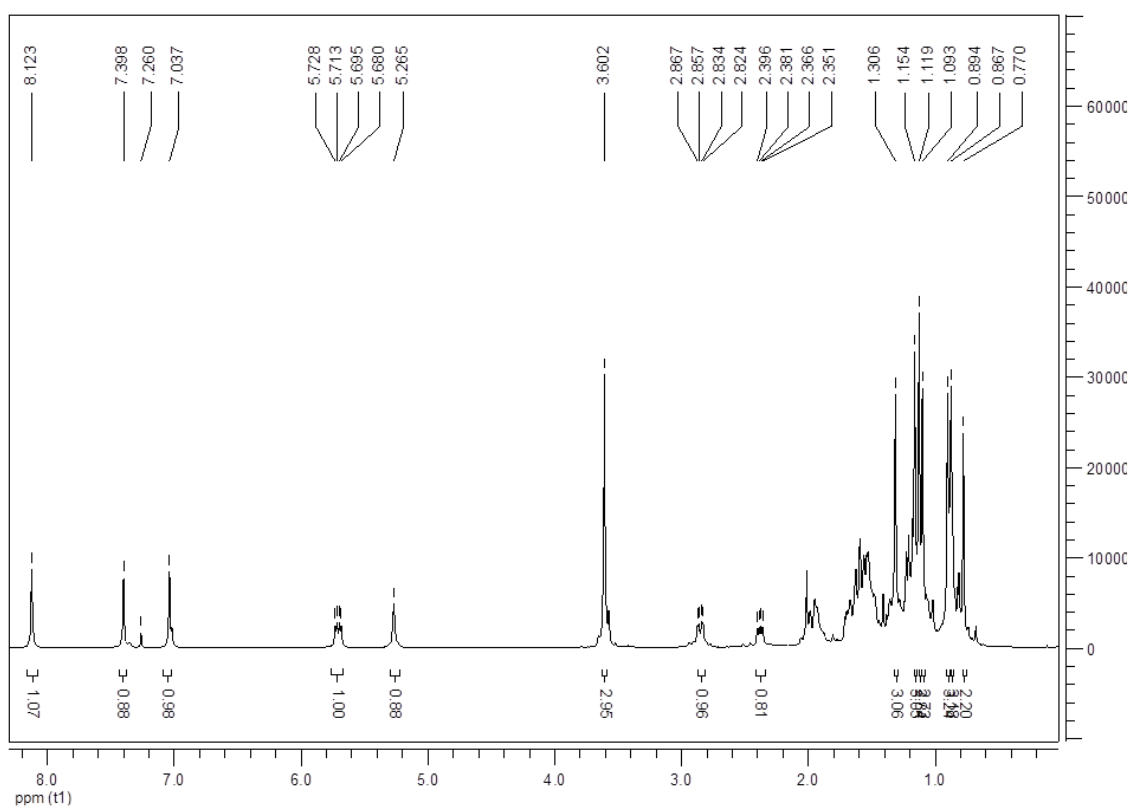

$^{13}\text{C}$  NMR spectrum for compound **28** recorded in  $\text{CDCl}_3$ .

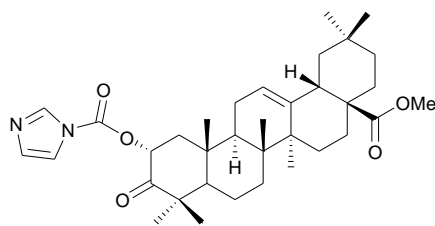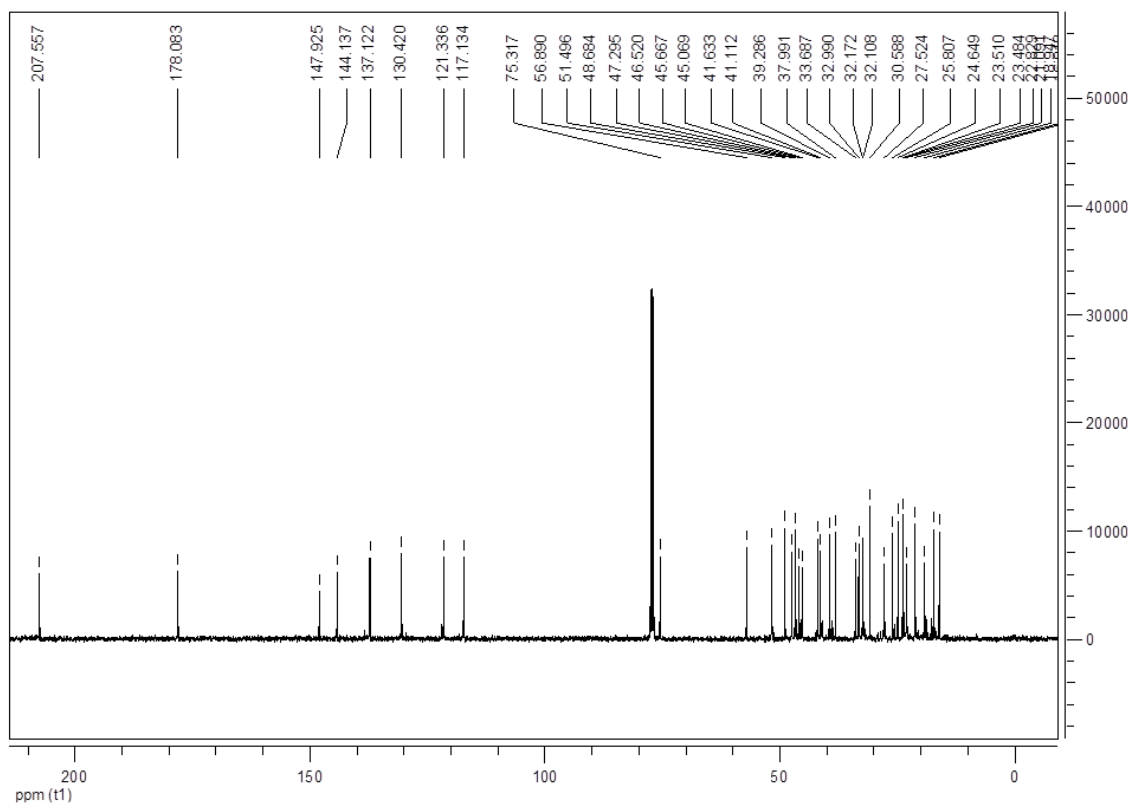

$^{13}\text{C}$  NMR spectrum detail of compound **28**.

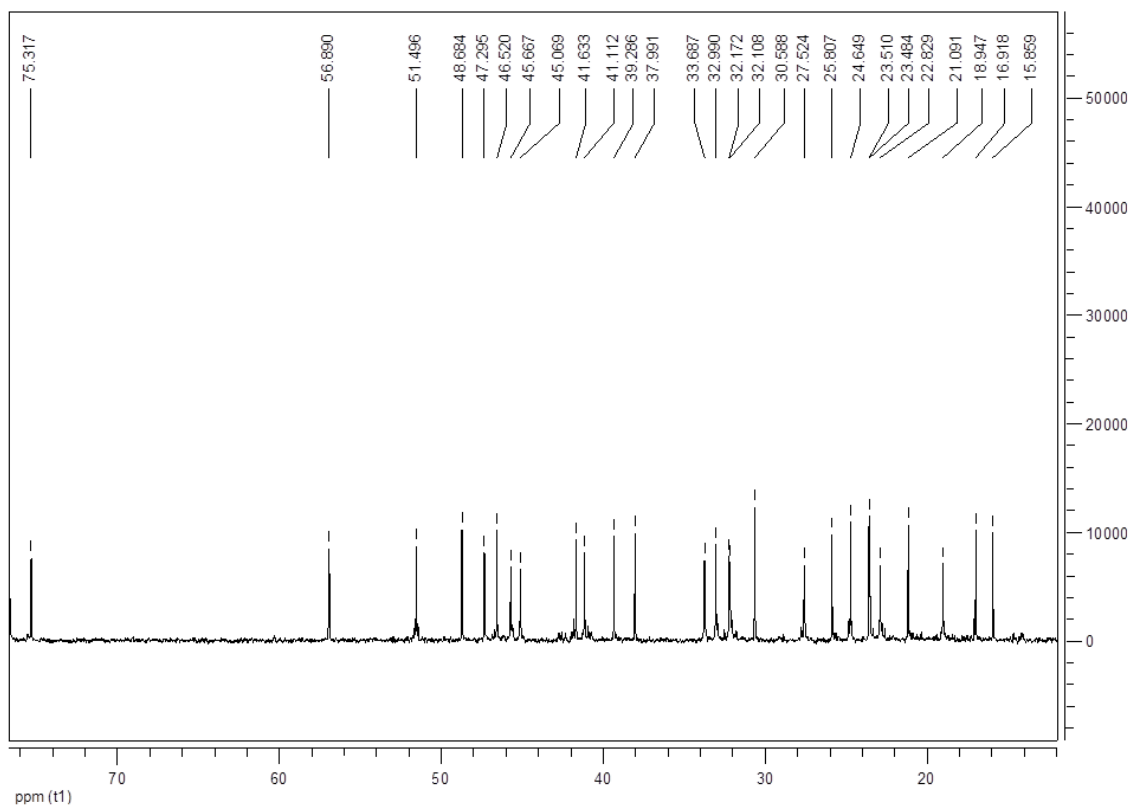

DEPT-135 NMR spectrum for compound **28** recorded in CDCl<sub>3</sub>.

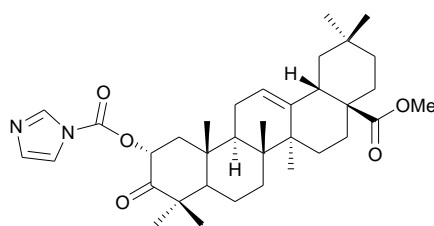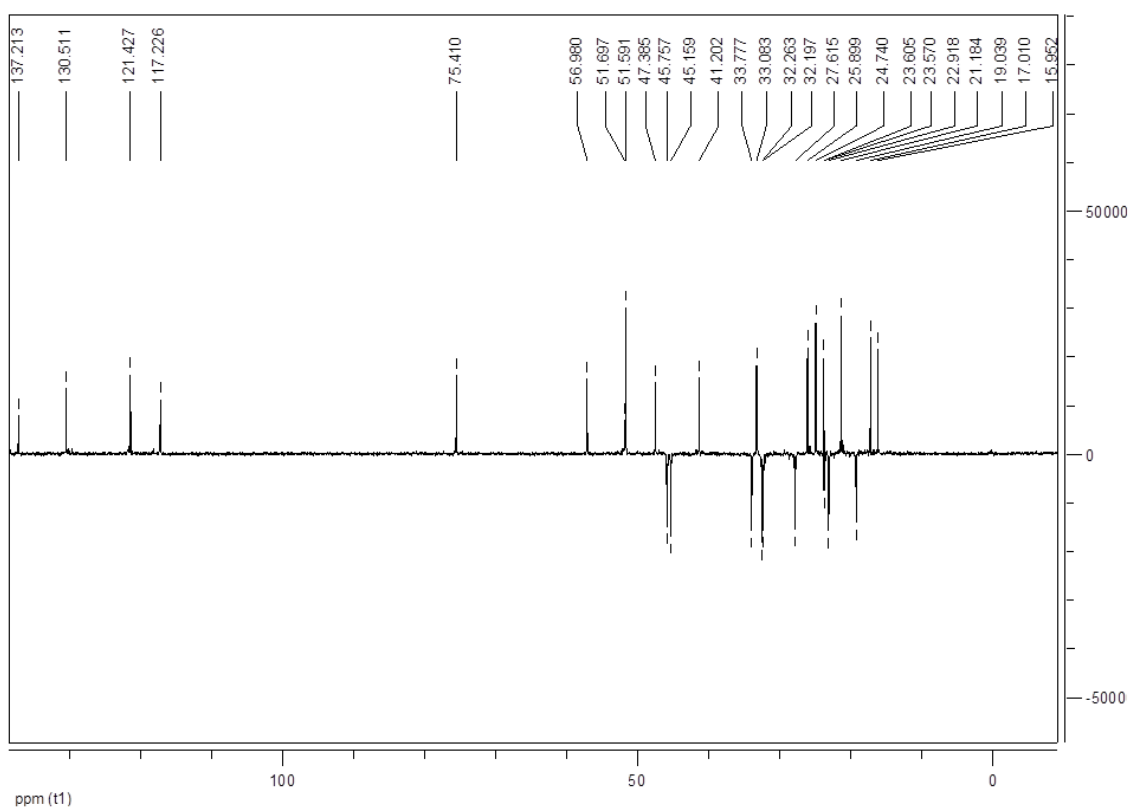

HMQC NMR spectrum for compound **28** recorded in CDCl<sub>3</sub>.

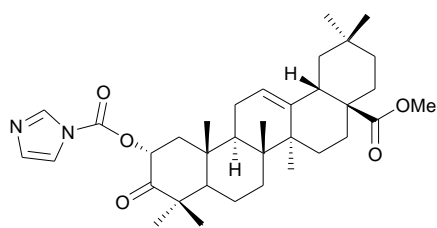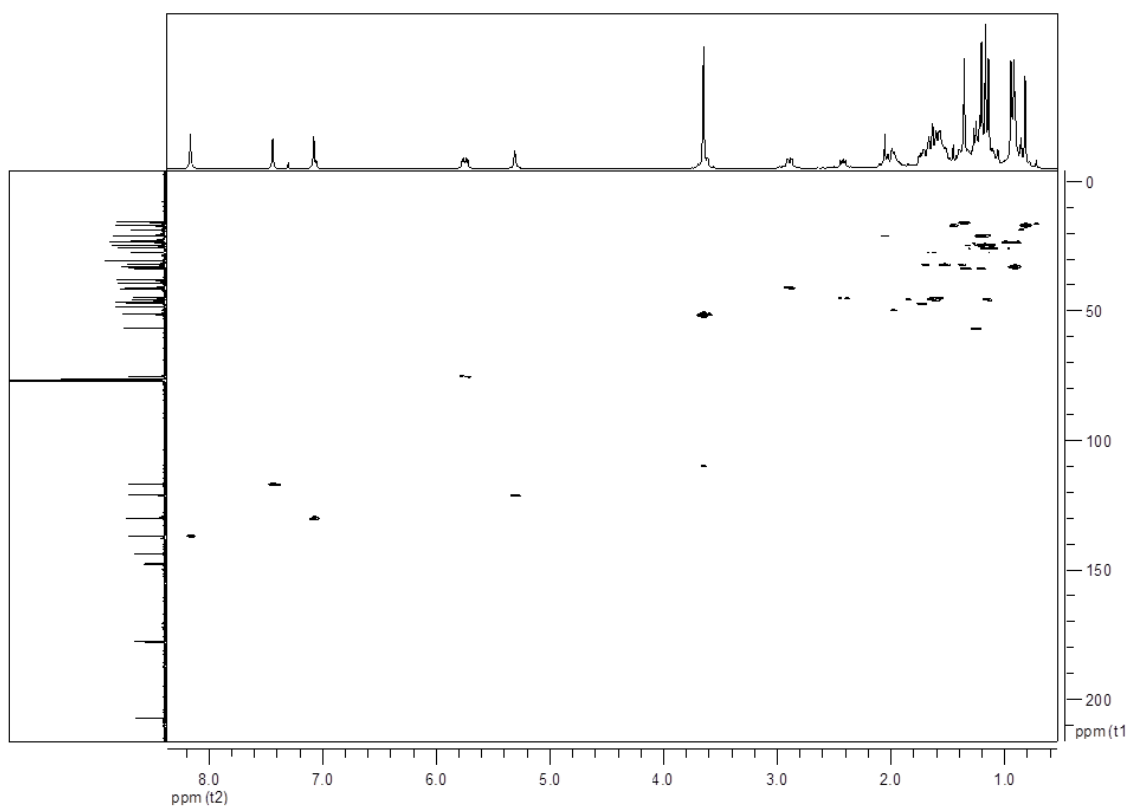



HMBC NMR spectrum for compound **28** recorded in CDCl<sub>3</sub>.

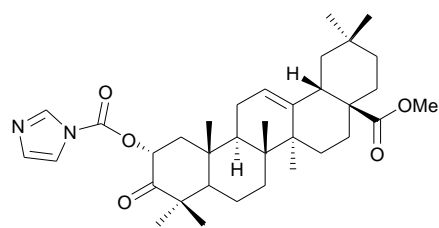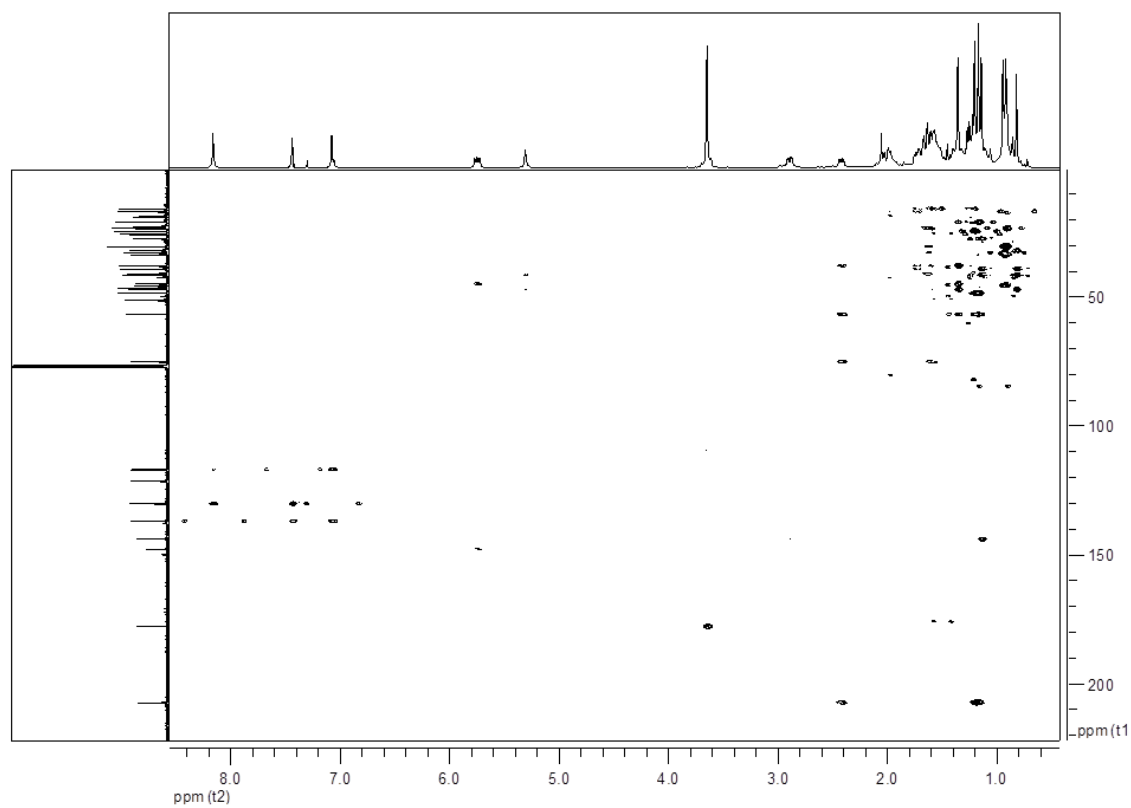

Supplement: c3ob00011g.pdf [file c3ob00011g.pdf]
